# Supplementary material for: Failure to address potential bias in non-randomised controlled clinical trials may cause lack of evidence on patient-reported outcomes: a method study
Source: PubMed Central journal article supplement — BMJ Open. 2014 Jun 4;4(6):e004720. doi: 10.1136/bmjopen-2013-004720 (PMC4054649; doi:10.1136/bmjopen-2013-004720), 2014-06-04
Supplement: bmjopen-2013-004720.draft_revisions.pdf [file bmjopen-2013-004720.draft_revisions.pdf]

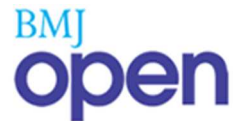

## Reasons for excluding studies on patient-reported outcomes in a systematic review

|                                 |                                                                                                                                                                                                                                                                                                                                             |
|---------------------------------|---------------------------------------------------------------------------------------------------------------------------------------------------------------------------------------------------------------------------------------------------------------------------------------------------------------------------------------------|
| Journal:                        | <i>BMJ Open</i>                                                                                                                                                                                                                                                                                                                             |
| Manuscript ID:                  | bmjopen-2013-004720                                                                                                                                                                                                                                                                                                                         |
| Article Type:                   | Research                                                                                                                                                                                                                                                                                                                                    |
| Date Submitted by the Author:   | 19-Dec-2013                                                                                                                                                                                                                                                                                                                                 |
| Complete List of Authors:       | Peinemann, Frank; Children's Hospital, University of Cologne, Kerpener Str. 62, 50937 Cologne, Germany,<br>Labeit, Alexander; University of Illinois, Outcomes Research Center<br>Thielscher, Christian; FOM University of Applied Science for Economics & Management,<br>Pinkawa, Michael; University Hospital, Department of Radiotherapy |
| <b>Primary Subject Heading</b>: | Evidence based practice                                                                                                                                                                                                                                                                                                                     |
| Secondary Subject Heading:      | Urology, Patient-centred medicine, Evidence based practice                                                                                                                                                                                                                                                                                  |
| Keywords:                       | Adult surgery < SURGERY, Radiation oncology < RADIOTHERAPY,<br>Urological tumours < ONCOLOGY                                                                                                                                                                                                                                                |
|                                 |                                                                                                                                                                                                                                                                                                                                             |

SCHOLARONE™  
Manuscripts

1 *Subject: Reasons for excluding PRO studies*

2  
3  
4 Reasons for excluding studies on patient-reported outcomes in a systematic review

5  
6  
7 Frank Peinemann,<sup>1,\*</sup> Alexander Michael Labeit,<sup>2,3</sup> Christian Thielscher,<sup>4</sup> Michael Pinkawa,<sup>5</sup>

8  
9  
10 <sup>1</sup>Children's Hospital, University of Cologne, Kerpener Str. 62, 50937 Cologne, Germany

11 <sup>2</sup>Institute of Experimental and Clinical Pharmacology and Toxicology, Medical Faculty

12  
13 Mannheim of the University of Heidelberg, Maybachstr. 14, 68169 Mannheim, Germany

14 <sup>3</sup>Outcomes Research Center, University of Illinois, One Illini Drive, Peoria, IL 61656, USA

15 <sup>4</sup>FOM University of Applied Science for Economics & Management, Leimkugelstr. 6, 45141  
16  
17 Essen, Germany

18  
19 <sup>5</sup>Department of Radiotherapy, University Hospital, Pauwelsstr. 30, 52074 Aachen, Germany

20  
21  
22 FP: [pubmedprjournal@gmail.com](mailto:pubmedprjournal@gmail.com)

23  
24 AML: [alexander.labeit@yahoo.de](mailto:alexander.labeit@yahoo.de)

25  
26 CT: [christian.thielscher@fom.de](mailto:christian.thielscher@fom.de)

27  
28 MP: [mpinkawa@ukaachen.de](mailto:mpinkawa@ukaachen.de)

29  
30  
31  
32  
33  
34 \*Corresponding author: Frank Peinemann, M.D., M.Sc., Children's Hospital, University of  
35 Cologne, Kerpener Str. 62, 50937 Cologne, Germany; e-mail: [pubmedprjournal@gmail.com](mailto:pubmedprjournal@gmail.com).  
36  
37 Phone: +49-176-31130745.  
38  
39  
40  
41  
42  
43  
44  
45  
46  
47  
48  
49  
50  
51  
52  
53  
54  
55  
56  
57  
58  
59  
60

1 *Subject: Reasons for excluding PRO studies*

2

3

## 4 **Abstract**

5

6

### 7 Background

8

9

10 Within the frame of a systematic review, we evaluated patient-reported outcomes of perma-

11

12 nent interstitial low-dose rate brachytherapy in patients with localized prostate cancer.

13

14

### 15 Objective

16

17

18 To summarize qualitatively the reasons for exclusion of nonrandomized controlled trials re-

19

20

21

22

23

24

25

26

27

28

29

30

31

32

33

34

35

36

37

38

39

40

41

42

43

44

45

46

47

48

49

50

51

52

53

54

55

56

57

58

59

60

reporting patient-reported outcomes.

### Methods

We searched PubMed, MEDLINE, EMBASE, and The Cochrane Library without restrictions on 14 June 2010. We defined the inclusion criteria according to the PICO framework. The outcomes in the present publication concerned methodological issues and were different from the initial publication: fulfilment of basic inclusion criteria according to a PICO framework and accomplishment of requirements to contain high risk of bias.

### Results

We found that 21 of 50 excluded nonrandomized controlled trials did not meet PICO inclusion criteria. The rest of 29 of 50 studies lacked quality of reporting. The resulting flaws included attrition bias due to loss of follow-up, lack of reporting baseline data, potential confounding due to unadjusted data, and lack of statistical comparison between groups.

### Conclusion

1 *Subject: Reasons for excluding PRO studies*

2  
3 With respect to the reporting of patient-reported outcomes, active efforts are required to im-  
4  
5 prove the quality of reporting in nonrandomized controlled trials concerning permanent inter-  
6  
7 stitial low-dose rate brachytherapy in patients with localized prostate cancer.  
8  
9

10  
11  
12  
13  
14  
15  
16  
17 Key words: systematic review, patient-reported outcome, risk of bias  
18  
19  
20  
21  
22  
23  
24  
25

### 26 **Strengths and limitations of this study**

- 27
- 28
- 29
- 30 • We conducted a comprehensive literature search and strictly adhered to the projected  
31 methodology.
- 32
- 33
- 34 • We identified a lack of quality in patient-reported studies, analysed the cause, and  
35 suggested possible improvements in designing studies in the future.
- 36
- 37
- 38 • The systematic review is confined to a single disease and conclusions drawn from its  
39 results may not be generalizable to other diseases.
- 40
- 41
- 42
- 43 • The limits for the inclusion of studies are arbitrarily set.
- 44
- 45
- 46
- 47
- 48
- 49
- 50
- 51
- 52
- 53
- 54
- 55
- 56
- 57
- 58
- 59
- 60

1 *Subject: Reasons for excluding PRO studies*

## 2 **Introduction**

3  
4  
5  
6  
7 We have conducted a systematic review to evaluate the effectiveness and adverse events of  
8  
9 permanent interstitial low-dose rate brachytherapy (LDR-BT) in patients with localized  
10  
11 prostate cancer categorized T1 to T2 [1]. We have compared LDR-BT with radical  
12  
13 prostatectomy (RP), external beam radiotherapy (EBRT), and 'no primary therapy' (NPT). We  
14  
15 used the term NPT to accommodate different types of observation including active  
16  
17 surveillance, watchful waiting, and observing without a distinctive management. We have  
18  
19 included one randomized controlled trial (RCT) and 30 nonrandomized controlled trials  
20  
21 (NRCT). The primary outcome was overall survival and cancer-specific survival. The  
22  
23 secondary outcomes were clinically defined disease-free survival, biochemical recurrence-free  
24  
25 survival, physician-reported severe adverse events, and patient-reported outcomes such as  
26  
27 function and bother scores as well as generic and disease-related health-related quality of life.  
28  
29 We concluded that the current evidence is insufficient to allow a definitive conclusion about  
30  
31 overall survival. RP and EBRT can severely affect the structural integrity of neighboring  
32  
33 organs and their functions and can cause considerable long-term impairment of health-related  
34  
35 quality of life. In a view of expecting similar survival but a tremendous difference of adverse  
36  
37 events between treatment alternatives, valid data on health-related quality of life could tip the  
38  
39 balance. At least, we assume that shared-decision making and consideration of patients'  
40  
41 preferences in searching for the best individual treatment would rely on information on  
42  
43 health-related quality of life data. Of the 30 included nonrandomized studies, 13 studies  
44  
45 reported patient-reported outcomes (PRO) [2]. During the study selection process, we  
46  
47 experienced that we excluded another 50 nonrandomized PRO studies. We found it a pity that  
48  
49 we could not use the many data. We had the impression that a considerable number of studies  
50  
51 were excluded because of lack in reporting quality. Therefore, we wanted to summarize the  
52  
53 reasons for excluding those PRO studies and make aware that authors of PRO studies should  
54  
55  
56  
57  
58  
59  
60

1 *Subject: Reasons for excluding PRO studies*

2  
3 meet some basic requirements for reporting of comparative PRO data to achieve higher  
4  
5 acceptance in the scientific community. The importance of reporting PRO has been addressed  
6  
7 by CONSORT [3] that recently has published a PRO extension to their acclaimed previous  
8  
9 statement with respect to RCT [4]. It may be wise to build a PRO extension to STROBE [5]  
10  
11 also to deal with the specific problems of observational studies.  
12

13  
14  
15 The first aim of this study is to assess whether the excluded studies met the basic inclusion  
16  
17 criteria using the PICO framework. The second aim of this study is to whether the excluded  
18  
19 studies met requirements to contain high risk of bias.  
20  
21  
22  
23  
24  
25  
26  
27  
28  
29  
30  
31  
32  
33  
34  
35  
36  
37  
38  
39  
40  
41  
42  
43  
44  
45  
46  
47  
48  
49  
50  
51  
52  
53  
54  
55  
56  
57  
58  
59  
60

1 *Subject: Reasons for excluding PRO studies*

## 2 **Materials and Methods**

3  
4  
5  
6  
7 While preparing this systematic review, we endorsed the PRISMA statement, adhered to its  
8 principles and conformed to its checklist [6].

### 9 **Study inclusion criteria**

10  
11  
12 We defined the inclusion criteria according to the PICO framework that should include four  
13 essential constituents, that is, the type of participants (P), intervention (I), comparator (C), and  
14 outcome (O) [7]. The four PICO items can be supplemented by timing (T) and setting (S), two  
15 other important features of a systematic review, to create the so-called PICOTS typology [8].  
16  
17 A further extension embraces the study design (SD) to complete all major items of a search  
18 strategy (PICOTS-SD) [9].  
19  
20  
21  
22  
23  
24  
25  
26  
27  
28

### 29 *Population*

30  
31  
32 Initial and present publication: Localized prostate cancer is defined by the categories T1 to T2  
33 of the Tumor-Node-Metastasis (TNM) staging system [10] if combined with an absence of  
34 both regional lymph node metastasis (N0) and distant metastasis (M0).  
35  
36  
37  
38  
39

### 40 *Intervention*

41  
42  
43 Initial and present publication: Brachytherapy [11] is short-distance radiotherapy placing  
44 radiation sources with different duration and rates of dose delivery in or near tumors [12].  
45  
46 LDR-BT means implanting of low-energy radioactive sources emitting radiation, which are  
47 contained in titanium pellets of the size of rice grains called seeds [13].  
48  
49  
50  
51  
52

### 53 *Comparator*

54  
55  
56 Initial and present publication: The European Association of Urology (EAU) suggested 3  
57  
58  
59  
60

1 *Subject: Reasons for excluding PRO studies*

2  
3 different treatment concepts for localized prostate cancer in addition to LDR-BT [11]: Radical  
4  
5 prostatectomy (RP), external beam radiotherapy (EBRT), and different types of observation  
6  
7 including active surveillance, watchful waiting, and observing without a distinctive  
8  
9 management.  
10

11  
12 *Outcome*

13  
14  
15 Initial publication: Overall survival, cancer-specific survival, disease-free survival,  
16  
17 biochemical recurrence-free survival, severe adverse events, and patient-reported outcomes.  
18  
19 Patient-reported outcomes comprised function and bother scores as well as generic and  
20  
21 disease-related health-related quality of life.  
22  
23

24  
25 Present publication: Fulfilment of basic inclusion criteria according to a PICO framework by  
26  
27 the excluded NRCT. Accomplishment of requirements to contain superimposed risk of bias in  
28  
29 addition to the high risk of bias caused by the lack of randomization framework by the  
30  
31 excluded NRCT.  
32  
33

34  
35 *Timing*

36  
37  
38 Initial and present publication: We did not set limits on the length of the observation period.  
39  
40

41  
42 *Setting*

43  
44  
45 Initial and present publication: We did not set limits on the setting such as type of country,  
46  
47 year of recruitment, or level of health care.  
48  
49

50  
51 *Study design*

52  
53  
54 Initial publication: We included RCT and NRCT evaluating LDR-BT as monotherapy in pa-  
55  
56 tients with localized prostate cancer. The proportion of relevant patients was required to be at  
57  
58  
59  
60



1 *Subject: Reasons for excluding PRO studies*

2  
3 least 80% of the study population and the response rate of questionnaires was expected to be  
4  
5 at least 70%. For NRCT to be included, comparable baseline characteristics between treat-  
6  
7 ment groups or adjustment for imbalances of these data were required. Limits on year of pub-  
8  
9 lication or language were not applied.  
10

11  
12 Present publication: We included specifically the NRCT that were excluded in the initial  
13  
14 publication.  
15

### 16 17 18 **Search strategy**

19  
20 We searched PubMed, MEDLINE, EMBASE, and The Cochrane Library without restrictions  
21  
22 on study design, publication year, and language. We conducted the last database searches on  
23  
24 14 June 2010. We tailored the terms and syntax used for the search in MEDLINE via Ovid as  
25  
26 shown Table 1 to the requirements of the other databases.  
27  
28

### 29 30 31 **Study selection**

32  
33 In the present study, we selected only those 50 nonrandomized studies on PRO that were ex-  
34  
35 cluded from the evaluation in the initial publication. In the study selection process, two re-  
36  
37 viewers independently judged whether a study was included or excluded. Differences were  
38  
39 resolved by discussion without the need for a third opinion.  
40  
41  
42

### 43 44 45 **Data collection and analysis**

46  
47 The reasons for exclusion were extracted independently by two reviewers. We sought for the  
48  
49 following data: the inclusion criteria using the PICO framework, the proportion of response of  
50  
51 participants to questionnaires, which was required to be at least 70%, the reporting of separate  
52  
53 baseline characteristics for each treatment group, the reporting of comparable baseline charac-  
54  
55 teristics or adjustment for imbalances of these data such as the use of a Cox proportional haz-  
56  
57  
58  
59  
60

1 *Subject: Reasons for excluding PRO studies*

2  
3 ard model, and the reporting of statistics comparing treatment groups. Sufficient comparabil-  
4  
5 ity was defined as a difference between baseline values that were not statistically significant.  
6  
7 If a statistical test was not reported, we assumed two comparable values if the greater of the  
8  
9 two values was less than 10% above the smaller one. We also required that authors reported  
10  
11 effect measures and statistics testing the difference between treatment groups, for example, p-  
12  
13 values or effect measures including 95% confidence intervals. Reporting of within group  
14  
15 comparisons or before-and-after analyses were not deemed sufficient for inclusion. We did  
16  
17 not apply a principal summary measure as we aimed at synthesize the information in a quali-  
18  
19 tative way.  
20  
21

#### 22 **Assessment of risk of bias and quality of reporting**

23  
24  
25 Two reviewers independently assessed the quality of reporting of NRCT according to the cri-  
26  
27 teria specified in the previous paragraph. We did not specifically assess the risk of bias be-  
28  
29 cause we decided to exclude all papers with regard to a lack of reporting essential data.  
30  
31  
32  
33  
34  
35  
36  
37  
38  
39  
40  
41  
42  
43  
44  
45  
46  
47  
48  
49  
50  
51  
52  
53  
54  
55  
56  
57  
58  
59  
60

1  
2  
3  
4  
5  
6  
7  
8  
9  
10  
11  
12  
13  
14  
15  
16  
17  
18  
19  
20  
21  
22  
23  
24  
25  
26  
27  
28  
29  
30  
31  
32  
33  
34  
35  
36  
37  
38  
39  
40  
41  
42  
43  
44  
45  
46  
47  
48  
49  
50  
51  
52  
53  
54  
55  
56  
57  
58  
59  
60

*Subject: Reasons for excluding PRO studies*

## Results

We documented the reasons for exclusion of all 50 nonrandomized studies that were identified as studies reporting on PRO (Table 2). In 42% (21 of 50) studies, simply the essential PICO framework was not met. In the majority of 58% (29 of 50) studies, the predefined requirement to apply measures to contain high risk of bias was not met. Of these 29 studies, 19 studies reported a proportion of patients responding to questionnaires of less than 70% or did not address this item. Baseline characteristics were not presented for treatment groups in 3 studies. In another 6 studies, baseline characteristics were not comparable between treatment groups or there was no confounder control in the analysis adjusting for important different factors such as mean age. The statistical comparison between treatment groups was deemed not appropriate in 1 study.

1 *Subject: Reasons for excluding PRO studies*

## 2 3 **Discussion**

### 4 5 6 **Main results**

7  
8  
9  
10 In summary, we found that roughly 4 of 10 excluded PRO studies did not meet the essential  
11 inclusion criteria using the PICO framework. This result is consistent with the problem of  
12 information retrieval aiming at a high recall and ending up with a low precision. The papers  
13 were obviously not relevant to the research question and we did not further examine the re-  
14 porting quality. We also found that roughly 6 of 10 excluded PRO studies met the PICO  
15 framework but did not provide predefined requirements to care sufficiently enough for a low  
16 response of patients to questionnaires, for reporting baseline characteristics between treatment  
17 groups, for adjusting differences in those baseline characteristics between treatment groups,  
18 and to use appropriate statistics to compare the outcome between treatment groups.  
19  
20  
21  
22  
23  
24  
25  
26  
27  
28  
29  
30

### 31 **Quality of reporting of patient-reported outcomes**

32  
33  
34 We identified a lack of quality of reporting in many excluded NRCT and we want to stress the  
35 importance of considering a series of requirements while conducting a study on PRO. Other  
36 authors have reported recently that, concerning disease-specific mortality or disease-free sur-  
37 vival, available studies did not show significant differences between treatment groups.  
38 [14,15]. In view of unknown or small differences in survival measures, the results of patient-  
39 reported outcomes studies could have a noticeable impact on medical decision making  
40 [16,17]. None of the 50 excluded studies reported a non-responder analysis, though it is  
41 known that non-responders may have different attitudes than responders. Etter 1997 conclud-  
42 ed that low response rates may be associated with overestimating an effect and that the  
43 strength and direction of a non-response bias may depend on the mechanism of non-response  
44 [18]. Therefore, results may be confounded if the proportion of included data not available for  
45  
46  
47  
48  
49  
50  
51  
52  
53  
54  
55  
56  
57  
58  
59  
60

1 *Subject: Reasons for excluding PRO studies*

2 analysis such as data from non-responders or due to loss to follow-up is considerable. We  
3 believe that a value of 30% or more can be denoted as considerable. Lowering this threshold,  
4 for example to 20%, would have resulted in less included studies. However, others suggested  
5 that 20% or more loss would be sufficient for a high risk of bias threatening the validity of  
6 results [19]. Concerning questionnaires, we recommend taking measures that are known to  
7 improve response rates [20,21]. Edwards 2009 conducted a systematic review to identify ef-  
8 fective strategies to increase the response to postal and electronic questionnaires [22]. The  
9 authors found several strategies to increase the response, for example, pre-notification, fol-  
10 low-up contact, shorter questionnaires, mentioning an obligation to respond, university spon-  
11 sorship, non-monetary incentives, a statement that others had responded, an offer of survey  
12 results, giving a deadline. We did not use a strict algorithm to differentiate between compara-  
13 ble and not comparable baseline values between treatment groups. A statistically significant  
14 difference was judged as not comparable. Not significant differences were also regarded as  
15 not comparable if the difference was at least 10% of the lower of two values. Using this ap-  
16 proach we tried to reduce subjective decisions. We are not aware of published strict algo-  
17 rithms in this matter.

### 38 **High risk of bias inherent in nonrandomized controlled trials**

39 In the view of including only 1 RCT, the initial publication was based almost exclusively on  
40 NRCT. However, the lack of randomization poses a very large challenge on the authors that  
41 are advised to deal with essential problems such as selection bias and confounding. Other-  
42 wise, the findings may not be valid and of limited usefulness and the many efforts may be in  
43 vain. We want to stress that the nonrandomized design is associated with a high risk of bias  
44 because known and unknown characteristics may be distributed unequally between groups  
45 [23]. Certain study characteristics such as prospective design, concurrent control group,  
46  
47  
48  
49  
50  
51  
52  
53  
54  
55  
56  
57  
58  
59  
60

1 *Subject: Reasons for excluding PRO studies*

2 adjustment of results with respect to different baseline values, and confounder control can  
3 limit additional bias. For example, Ioannidis 2001 [24] reported that discrepancies between  
4 RCT and NRCT were less common when only NRCT with a prospective design were  
5 considered. The Cochrane Collaboration offers a guide for inclusion of nonrandomized  
6 studies [25] and it has developed a tool for assessing the risk of bias in both RCT and  
7 controlled NRS [26]. Guidelines for reporting observational studies have been published to  
8 improve their quality [5]. Cox regression analysis, propensity-score-based analysis, and in-  
9 strumental variable analysis are methods that have been used for correction of confounding  
10 bias in non-randomized studies [27]. Different values of various outcome measures between  
11 groups may be simply caused by different baseline data in lieu of absent significant treatment  
12 effects. We accepted any type of method adjusting or stratifying for one or more known dif-  
13 ferences in baseline characteristics. Nevertheless, it should be kept in mind that methods of  
14 adjustment do not guarantee removal of bias and that residual confounding may remain high  
15 [23]. Concerning the non-randomized design, we strongly recommend the use of methods for  
16 adjusting the results for confounders to aim for a less biased estimation of the treatment effect  
17 [28] and the adoption of guidelines for the reporting of observational studies [5].

### 39 **Strengths and limitations**

40 The strengths of the present study are a comprehensive literature search, strict adherence to  
41 the projected methodology, the identification of lack of quality in PRO studies and addressing  
42 the specific problems of PRO studies. We should consider some limitations: The study is con-  
43 fined to a single disease and conclusions drawn from its results may not be generalizable to  
44 other diseases. The arbitrary limits set for inclusion of studies are responsible for the extent of  
45 excluded studies. These limits may be questioned by other investigators. During re-evaluation  
46 of study quality, we found that one study fulfilled all criteria, although, this study was exclud-  
47 ed.

1 *Subject: Reasons for excluding PRO studies*

2 ed in previous reports [29]. The minimum follow-up of 70% for inclusion was set arbitrarily  
3 and others might find this threshold too low. We did not endorse the recently published re-  
4 porting of PRO in randomized trials, an extension of the CONSORT statement [4]. All in-  
5 cluded studies in the present review are nonrandomized. We think that the lack of randomiza-  
6 tion is the prevailing issue. We did not endorse the CONSORT PRO extension for another  
7 reason. The included studies were published many years before this extension was published.  
8 There might be a need to develop an extension of the STROBE statement [5] aiming to im-  
9 prove the reporting of PRO in nonrandomized studies. This extension could emphasize the  
10 specific challenges of reporting PRO with respect to lack of randomization.  
11  
12  
13  
14  
15  
16  
17  
18  
19  
20  
21  
22  
23  
24  
25  
26  
27  
28  
29  
30  
31  
32  
33  
34  
35  
36  
37  
38  
39  
40  
41  
42  
43  
44  
45  
46  
47  
48  
49  
50  
51  
52  
53  
54  
55  
56  
57  
58  
59  
60

1 *Subject: Reasons for excluding PRO studies*

## 2 **Conclusions**

3  
4  
5  
6  
7 We found that a considerable number of non-randomized controlled reporting patient-reported  
8  
9 outcomes were excluded from a systematic review because of a lack of predefined reporting  
10  
11 requirements. The assumed overall risk of bias was regarded too high to consider the data of  
12  
13 these studies for inclusion in the systematic review. With respect to the reporting of patient-  
14  
15 reported outcomes, active efforts are required to improve the quality of reporting in nonran-  
16  
17 domized controlled trials and to increase the number of randomized controlled trials.  
18  
19  
20  
21  
22  
23  
24  
25  
26  
27  
28  
29  
30  
31  
32  
33  
34  
35  
36  
37  
38  
39  
40  
41  
42  
43  
44  
45  
46  
47  
48  
49  
50  
51  
52  
53  
54  
55  
56  
57  
58  
59  
60



1 *Subject: Reasons for excluding PRO studies*

2

3

4

5

6

## 7 **Acknowledgements**

8

9

10 The authors declare that they have no competing interests. Parts of the study have been pre-  
11 sented at 19th Cochrane Colloquium 19 to 22 October 2011 in Madrid, Spain. No funding  
12 bodies had any role in study design, data collection and analysis, decision to publish, or prep-  
13 aration of the manuscript.  
14  
15  
16  
17  
18

### 19 **Contributorship Statement**

20

21

22 Frank Peinemann: design, data analysis, writing of the manuscript  
23

24 Alexander Michael Labeit: interpretation of data  
25

26 Christian Thielscher: interpretation of data  
27

28 Michael Pinkawa: urological advice  
29

### 30 **Data Sharing Statement**

31

32

33 No additional unpublished data  
34

### 35 **Competing interests**

36

37

38 No additional unpublished data  
39

40

41

42

43

44

45

46

47

48

49

50

51

52

53

54

55

56

57

58

59

60

Subject: Reasons for excluding PRO studies

## References

1. Peinemann F, Grouven U, Bartel C, Sauerland S, Borchers H, Pinkawa M et al. Permanent interstitial low-dose rate brachytherapy for patients with localized prostate cancer – a systematic review of randomized and non-randomized controlled clinical trials. *Eur Urol* 2011; 60(5): 881-893.
2. Patrick D, Guyatt GH, Acquadro C. Chapter 17: Patient-reported outcomes. In: Higgins JPT, Green S (Ed). *Cochrane Handbook for Systematic Reviews of Interventions Version 5.1.0* [updated March 2011]. Oxford: The Cochrane Collaboration; 2011. URL: [http://www.mrc-bsu.cam.ac.uk/cochrane/handbook/chapter\\_17/17\\_patient\\_reported\\_outcomes.htm](http://www.mrc-bsu.cam.ac.uk/cochrane/handbook/chapter_17/17_patient_reported_outcomes.htm).
3. Schulz KF, Altman DG, Moher D, Group C. CONSORT 2010 statement: updated guidelines for reporting parallel group randomised trials. *PLoS Med* 2010; 7(3): e1000251.
4. Calvert M, Blazeby J, Altman DG, Revicki DA, Moher D, Brundage MD et al. Reporting of patient-reported outcomes in randomized trials: the CONSORT PRO extension. *JAMA* 2013; 309(8): 814-822.
5. von Elm E, Altman DG, Egger M, Pocock SJ, Gotsche PC, Vandenbroucke JP. The Strengthening the Reporting of Observational Studies in Epidemiology (STROBE) statement: guidelines for reporting observational studies. *PLoS Med* 2007; 4(10): e296.
6. Moher D, Liberati A, Tetzlaff J, Altman DG. Preferred reporting items for systematic reviews and meta-analyses: the PRISMA statement. *PLoS Med* 2009; 6(7): e1000097.
7. O'Connor D, Green S, Higgins JPT. Chapter 5: Defining the review question and developing criteria for including studies. In: Higgins JPT, Green S (Ed). *Cochrane Handbook for Systematic Reviews of Interventions Version 5.1.0* [updated March 2011]. Oxford: The Cochrane Collaboration; 2011. URL: [http://www.mrc-bsu.cam.ac.uk/cochrane/handbook/chapter\\_5/5\\_defining\\_the\\_review\\_question\\_and\\_developing\\_criteria\\_for.htm](http://www.mrc-bsu.cam.ac.uk/cochrane/handbook/chapter_5/5_defining_the_review_question_and_developing_criteria_for.htm).
8. AHRQ. Chapter 1. Introduction to the Methods Guide for Medical Test Reviews. In: *Methods Guide for Medical Test Reviews*. AHRQ Publication No. 12-EC017. June 2012. Rockville: Agency for Healthcare Research and Quality; 2012. URL: [http://effectivehealthcare.ahrq.gov/ehc/products/246/558/Methods-Guide-for-Medical-Test-Reviews\\_Full-Guide\\_20120530.pdf](http://effectivehealthcare.ahrq.gov/ehc/products/246/558/Methods-Guide-for-Medical-Test-Reviews_Full-Guide_20120530.pdf).
9. White CM, Ip S, McPheeters M, Carey TS, Chou R, Lohr KN et al. Using existing systematic reviews to replace de novo processes in conducting Comparative Effectiveness Reviews [posted September 2009]. In: *Methods Guide for Comparative Effectiveness Reviews*. Rockville: Agency for Healthcare Research and Quality; 2009. URL: <http://effectivehealthcare.ahrq.gov/repFiles/methodsguide/systematicreviewsreplacedenovofdf>.
10. Ebele JN, Sauter G, Epstein JI, Sesterhenn IA. *Pathology and genetics of tumours of the urinary system and male genital organs 2004*. Lyon: IARC Press; 2004. (World Health

1 *Subject: Reasons for excluding PRO studies*

2  
3 Organization classification of tumours; Band 6). URL:

4 <http://www.iarc.fr/en/publications/pdfs-online/pat-gen/bb7/bb7-cover.pdf>.

5  
6 11. Heidenreich A, Bolla M, Joniau S, Mason M, Matveev V, Mottet N et al. Guidelines on  
7 prostate cancer [PDF on Internet] [online]. [Zugriff: 31 October 2012]. URL:

8 [http://www.uroweb.org/gls/pdf/08\\_Prostate\\_Cancer.pdf](http://www.uroweb.org/gls/pdf/08_Prostate_Cancer.pdf).

9  
10 12. AUA. Prostate cancer. Guideline for the management of clinically localized prostate  
11 cancer: 2007 update [online]. 2007. URL: [http://www.auanet.org/content/guidelines-and-](http://www.auanet.org/content/guidelines-and-quality-care/clinical-guidelines/main-reports/proscan07/content.pdf)  
12 [quality-care/clinical-guidelines/main-reports/proscan07/content.pdf](http://www.auanet.org/content/guidelines-and-quality-care/clinical-guidelines/main-reports/proscan07/content.pdf).

13  
14 13. Nath R. Overview of brachytherapy physics. In: Thomadsen BR, Rivard MR, Butler W  
15 (Ed). Brachytherapy physics. Madison: Medical Physics Publishing; 2005.

16  
17 14. Wilt TJ, MacDonald R, Rutks I, Shamliyan TA, Taylor BC, Kane RL. Systematic review:  
18 comparative effectiveness and harms of treatments for clinically localized prostate cancer.  
19 Ann Intern Med 2008; 148(6): 435-448.

20  
21 15. Koukourakis G, Kelekis N, Armonis V, Kouloulis V. Brachytherapy for prostate cancer:  
22 a systematic review. Adv Urol 2009: 327945.

23  
24 16. Rosenthal SA, Bittner NH, Beyer DC, Demanes DJ, Goldsmith BJ, Horwitz EM et al.  
25 American Society for Radiation Oncology (ASTRO) and American College of Radiology  
26 (ACR) practice guideline for the transperineal permanent brachytherapy of prostate cancer.  
27 Int J Radiat Oncol Biol Phys 2011; 79(2): 335-341.

28  
29 17. Crook JM, Gomez-Iturriaga A, Wallace K, Ma C, Alibhai SM, Jewett MA et al.  
30 Comparison of health-related quality of life 5 years after SPIRIT (Surgical Prostatectomy  
31 [RP] versus Interstitial Radiation [BT] Intervention trial ACOSOG Z0070). Int J Radiat Oncol  
32 Biol Phys 2010; 78(3 Suppl 1): S76.

33  
34 18. Etter JF, Perneger TV. Analysis of non-response bias in a mailed health survey. J Clin  
35 Epidemiol 1997; 50(10): 1123-1128.

36  
37 19. Schulz KF, Grimes DA. Sample size slippages in randomised trials: exclusions and the  
38 lost and wayward. Lancet 2002; 359(9308): 781-785.

39  
40 20. Smeeth L, Fletcher AE. Improving the response rates to questionnaires. BMJ 2002;  
41 324(7347): 1168-1169.

42  
43 21. Brealey SD, Atwell C, Bryan S, Coulton S, Cox H, Cross B et al. Improving response  
44 rates using a monetary incentive for patient completion of questionnaires: an observational  
45 study. BMC Med Res Methodol 2007; 7: 12.

46  
47 22. Edwards PJ, Roberts I, Clarke MJ, Diguiseppi C, Wentz R, Kwan I et al. Methods to  
48 increase response to postal and electronic questionnaires. Cochrane Database Syst Rev 2009;  
49 (3): MR000008.

50  
51 23. Deeks JJ, Dinnes J, D'Amico R, Sowden AJ, Sakarovitch C, Song F et al. Evaluating non-  
52 randomised intervention studies. Health Technol Assess 2003; 7(27): iii-x, 1-173.

1 *Subject: Reasons for excluding PRO studies*

2  
3 24. Ioannidis JP, Haidich AB, Pappa M, Pantazis N, Kokori SI, Tektonidou MG et al.  
4 Comparison of evidence of treatment effects in randomized and nonrandomized studies.  
5 JAMA 2001; 286(7): 821-830.  
6

7 25. Reeves BC, Deeks JJ, Higgins JPT, Wells GA. Chapter 13: Including non-randomized  
8 studies [online]. (Cochrane Handbook for Systematic Reviews of Interventions Version 5.1.0  
9 [updated March 2011]). URL: [http://www.mrc-](http://www.mrc-bsu.cam.ac.uk/cochrane/handbook/chapter_13/13_including_non_randomized_studies.htm)  
10 [bsu.cam.ac.uk/cochrane/handbook/chapter\\_13/13\\_including\\_non\\_randomized\\_studies.htm](http://www.mrc-bsu.cam.ac.uk/cochrane/handbook/chapter_13/13_including_non_randomized_studies.htm).  
11

12 26. Higgins JPT, Altman DG, Sterne JAC. Chapter 8: Assessing risk of bias in included  
13 studies. In: Higgins JPT, Green S (Ed). Cochrane Handbook for Systematic Reviews of  
14 Interventions Version 5.1.0 [updated March 2011]. The Cochrane Collaboration; 2011. (Band  
15 25.05.2010). URL: [http://www.mrc-](http://www.mrc-bsu.cam.ac.uk/cochrane/handbook/chapter_8/8_assessing_risk_of_bias_in_included_studies.htm)  
16 [bsu.cam.ac.uk/cochrane/handbook/chapter\\_8/8\\_assessing\\_risk\\_of\\_bias\\_in\\_included\\_studies.h](http://www.mrc-bsu.cam.ac.uk/cochrane/handbook/chapter_8/8_assessing_risk_of_bias_in_included_studies.htm)  
17 [tm](http://www.mrc-bsu.cam.ac.uk/cochrane/handbook/chapter_8/8_assessing_risk_of_bias_in_included_studies.htm).  
18  
19

20 27. Schmoor C, Gall C, Stampf S, Graf E. Correction of confounding bias in non-randomized  
21 studies by appropriate weighting. Biometrical journal Biometrische Zeitschrift 2011; 53(2):  
22 369-387.  
23

24 28. Cox E, Martin BC, Van Staa T, Garbe E, Siebert U, Johnson ML. Good research practices  
25 for comparative effectiveness research: approaches to mitigate bias and confounding in the  
26 design of nonrandomized studies of treatment effects using secondary data sources: the  
27 International Society for Pharmacoeconomics and Outcomes Research Good Research  
28 Practices for Retrospective Database Analysis Task Force Report--Part II. Value in health :  
29 the journal of the International Society for Pharmacoeconomics and Outcomes Research  
30 2009; 12(8): 1053-1061.  
31  
32

33 29. Pinkawa M, Asadpour B, Piroth MD, Gagel B, Nussen S, Kehl M et al. Health-related  
34 quality of life after permanent I-125 brachytherapy and conformal external beam radiotherapy  
35 for prostate cancer: a matched-pair comparison. Radiother Oncol 2009; 91(2): 225-231.  
36

37 30. Bacon CG, Giovannucci E, Testa M, Kawachi I. The impact of cancer treatment on  
38 quality of life outcomes for patients with localized prostate cancer. J Urol 2001; 166(5):  
39 1804-1810.  
40

41 31. Ball AJ, Gambill B, Fabrizio MD, Davis JW, Given RW, Lynch DF et al. Prospective  
42 longitudinal comparative study of early health-related quality-of-life outcomes in patients  
43 undergoing surgical treatment for localized prostate cancer: a short-term evaluation of five  
44 approaches from a single institution. J Endourol 2006; 20(10): 723-731.  
45  
46

47 32. Befort CA, Zelefsky MJ, Scardino PT, Borrayo E, Giesler RB, Kattan MW. A measure of  
48 health-related quality of life among patients with localized prostate cancer: Results from  
49 ongoing scale development. Clinical Prostate Cancer 2005; 4(2): 100-108.  
50

51 33. Bergman J, Gore JL, Penson DF, Kwan L, Litwin MS. Erectile aid use by men treated for  
52 localized prostate cancer. J Urol 2009; 182(2): 649-654.  
53

54 34. Bergman J, Kwan L, Litwin MS. Improving decisions for men with prostate cancer:  
55 translational outcomes research. J Urol 2010; 183(6): 2186-2192.  
56  
57  
58  
59  
60

*Subject: Reasons for excluding PRO studies*

- 1  
2  
3 35. Brandeis JM, Litwin MS, Burnison CM, Reiter RE. Quality of life outcomes after  
4 brachytherapy for early stage prostate cancer. *J Urol* 2000; 163(3): 851-857.  
5  
6 36. Brown MW, Brooks JP, Albert PS, Poggi MM. An analysis of erectile function after  
7 intensity modulated radiation therapy for localized prostate carcinoma. *Prostate Cancer*  
8 *Prostatic Dis* 2007; 10(2): 189-193.  
9  
10 37. Burnett AL, Aus G, Canby-Hagino ED, Cookson MS, D'Amico AV, Dmochowski RR et  
11 al. Erectile function outcome reporting after clinically localized prostate cancer treatment. *J*  
12 *Urol* 2007; 178(2): 597-601.  
13  
14 38. Chaikin DC, Broderick GA, Malloy TR, Malkowicz SB, Whittington R, Wein AJ. Erectile  
15 dysfunction following minimally invasive treatments for prostate cancer. *Urology* 1996;  
16 48(1): 100-104.  
17  
18 39. Chen RC, Clark JA, Talcott JA. Individualizing quality-of-life outcomes reporting: how  
19 localized prostate cancer treatments affect patients with different levels of baseline urinary,  
20 bowel, and sexual function. *J Clin Oncol* 2009; 27(24): 3916-3922.  
21  
22 40. Choo R, Long J, Gray R, Morton G, Gardner S, Danjoux C. Prospective survey of sexual  
23 function among patients with clinically localized prostate cancer referred for definitive  
24 radiotherapy and the impact of radiotherapy on sexual function. *Support Care Cancer* 2010;  
25 18(6): 715-722.  
26  
27 41. Clark JA, Inui TS, Silliman RA, Bokhour BG, Krasnow SH, Robinson RA et al. Patients'  
28 perceptions of quality of life after treatment for early prostate cancer. *J Clin Oncol* 2003;  
29 21(20): 3777-3784.  
30  
31 42. Downs TM, Sadetsky N, Pasta DJ, Grossfeld GD, Kane CJ, Mehta SS et al. Health related  
32 quality of life patterns in patients treated with interstitial prostate brachytherapy for localized  
33 prostate cancer--data from CaPSURE. *The Journal of urology* 2003; 170(5): 1822-1827.  
34  
35 43. Eton DT, Lepore SJ, Helgeson VS. Early quality of life in patients with localized prostate  
36 carcinoma: an examination of treatment-related, demographic, and psychosocial factors.  
37 *Cancer* 2001; 92(6): 1451-1459.  
38  
39 44. Frank SJ, Pisters LL, Davis J, Lee AK, Bassett R, Kuban DA. An assessment of quality of  
40 life following radical prostatectomy, high dose external beam radiation therapy and  
41 brachytherapy iodine implantation as monotherapies for localized prostate cancer.[Erratum  
42 appears in *J Urol*. 2007 Sep;178(3 Pt 1):1125]. *J Urol* 2007; 177(6): 2151-2156; discussion  
43 2156.  
44  
45 45. Fulmer BR, Bissonette EA, Petroni GR, Theodorescu D. Prospective assessment of  
46 voiding and sexual function after treatment for localized prostate carcinoma: comparison of  
47 radical prostatectomy to hormonobrachytherapy with and without external beam radiotherapy.  
48 *Cancer* 2001; 91(11): 2046-2055.  
49  
50 46. Gore JL, Kwan L, Lee SP, Reiter RE, Litwin MS. Survivorship beyond convalescence:  
51 48-month quality-of-life outcomes after treatment for localized prostate cancer. *J Natl Cancer*  
52 *Inst* 2009; 101(12): 888-892.  
53  
54  
55  
56  
57  
58  
59  
60

*Subject: Reasons for excluding PRO studies*

- 1  
2  
3 47. Guedea F, Ferrer M, Pera J, Aguilo F, Boladeras A, Suarez JF et al. Quality of life two  
4 years after radical prostatectomy, prostate brachytherapy or external beam radiotherapy for  
5 clinically localised prostate cancer: the Catalan Institute of Oncology/Bellvitge Hospital  
6 experience. *Clinical & Translational Oncology: Official Publication of the Federation of*  
7 *Spanish Oncology Societies & of the National Cancer Institute of Mexico* 2009; 11(7): 470-  
8 478.  
9  
10 48. Hashine K, Kusuhara Y, Miura N, Shirato A, Sumiyoshi Y, Kataoka M. A prospective  
11 longitudinal study comparing a radical retropubic prostatectomy and permanent prostate  
12 brachytherapy regarding the health-related quality of life for localized prostate cancer. *Jpn J*  
13 *Clin Oncol* 2008; 38(7): 480-485.  
14  
15 49. Hashine K, Kusuhara Y, Miura N, Shirato A, Sumiyoshi Y, Kataoka M. Health-related  
16 quality of life using SF-8 and EPIC questionnaires after treatment with radical retropubic  
17 prostatectomy and permanent prostate brachytherapy. *Jpn J Clin Oncol* 2009; 39(8): 502-508.  
18  
19 50. Hervouet S, Savard J, Simard S, Ivers H, Laverdiere J, Vigneault E et al. Psychological  
20 functioning associated with prostate cancer: cross-sectional comparison of patients treated  
21 with radiotherapy, brachytherapy, or surgery. *J Pain Symptom Manage* 2005; 30(5): 474-484.  
22  
23 51. Hollenbeck BK, Dunn RL, Wei JT, McLaughlin PW, Han M, Sanda MG. Neoadjuvant  
24 hormonal therapy and older age are associated with adverse sexual health-related quality-of-  
25 life outcome after prostate brachytherapy. *Urology* 2002; 59(4): 480-484.  
26  
27 52. Jo Y, Junichi H, Tomohiro F, Yoshinari I, Masato F. Radical prostatectomy versus high-  
28 dose rate brachytherapy for prostate cancer: effects on health-related quality of life. *BJU Int*  
29 2005; 96(1): 43-47.  
30  
31 53. Johnstone PA, Gray C, Powell CR. Quality of life in T1-3N0 prostate cancer patients  
32 treated with radiation therapy with minimum 10-year follow-up. *Int J Radiat Oncol Biol Phys*  
33 2000; 46(4): 833-838.  
34  
35 54. Joly F, Brune D, Couette JE, Lesaunier F, Heron JF, Peny J et al. Health-related quality of  
36 life and sequelae in patients treated with brachytherapy and external beam irradiation for  
37 localized prostate cancer. *Ann Oncol* 1998; 9(7): 751-757.  
38  
39 55. Kakehi Y, Takegami M, Suzukamo Y, Namiki S, Arai Y, Kamoto T et al. Health related  
40 quality of life in Japanese men with localized prostate cancer treated with current multiple  
41 modalities assessed by a newly developed Japanese version of the Expanded Prostate Cancer  
42 Index Composite. *J Urol* 2007; 177(5): 1856-1861.  
43  
44 56. Lev EL, Eller LS, Gejerman G, Kolassa J, Colella J, Pezzino J et al. Quality of life of men  
45 treated for localized prostate cancer: outcomes at 6 and 12 months. *Support Care Cancer*  
46 2009; 17(5): 509-517.  
47  
48 57. Lilleby W, Fossa SD, Waehre HR, Olsen DR. Long-term morbidity and quality of life in  
49 patients with localized prostate cancer undergoing definitive radiotherapy or radical  
50 prostatectomy. *Int J Radiat Oncol Biol Phys* 1999; 43(4): 735-743.  
51  
52 58. Litwin MS, Sadetsky N, Pasta DJ, Lubeck DP. Bowel function and bother after treatment  
53 for early stage prostate cancer: a longitudinal quality of life analysis from CaPSURE. *The*  
54 *Journal of urology* 2004; 172(2): 515-519.  
55  
56  
57  
58  
59  
60



*Subject: Reasons for excluding PRO studies*

59. Litwin MS, Gore JL, Kwan L, Brandeis JM, Lee SP, Withers HR et al. Quality of life after surgery, external beam irradiation, or brachytherapy for early-stage prostate cancer. *Cancer* 2007; 109(11): 2239-2247.

60. Mehta SS, Lubeck DP, Pasta DJ, Litwin MS. Fear of cancer recurrence in patients undergoing definitive treatment for prostate cancer: results from CaPSURE. *J Urol* 2003; 170(5): 1931-1933.

61. Miller DC, Sanda MG, Dunn RL, Montie JE, Pimentel H, Sandler HM et al. Long-term outcomes among localized prostate cancer survivors: health-related quality-of-life changes after radical prostatectomy, external radiation, and brachytherapy. *Journal of clinical oncology : official journal of the American Society of Clinical Oncology* 2005; 23(12): 2772-2780.

62. Miller DC, Wei JT, Dunn RL, Montie JE, Pimentel H, Sandler HM et al. Use of medications or devices for erectile dysfunction among long-term prostate cancer treatment survivors: potential influence of sexual motivation and/or indifference. *Urology* 2006; 68(1): 166-171.

63. Monahan PO, Champion V, Rawl S, Giesler RB, Given B, Given CW et al. What contributes more strongly to predicting QOL during 1-year recovery from treatment for clinically localized prostate cancer: 4-weeks-post-treatment depressive symptoms or type of treatment? *Qual Life Res* 2007; 16(3): 399-411.

64. Namiki S, Satoh T, Baba S, Ishiyama H, Hayakawa K, Saito S et al. Quality of life after brachytherapy or radical prostatectomy for localized prostate cancer: a prospective longitudinal study. *Urology* 2006; 68(6): 1230-1236.

65. Namiki S, Kwan L, Kagawa-Singer M, Terai A, Satoh T, Baba S et al. Distress and social dysfunction following prostate cancer treatment: a longitudinal cross-cultural comparison of Japanese and American men. *Prostate Cancer & Prostatic Diseases* 2009; 12(1): 67-71.

66. Ohashi T, Yorozu A, Toya K, Saito S, Momma T. Serial changes of international prostate symptom score following I-125 prostate brachytherapy. *Int J Clin Oncol* 2006; 11(4): 320-325.

67. Pinkawa M, Fishedick K, Gagel B, Piroth MD, Borchers H, Jakse G et al. Association of neoadjuvant hormonal therapy with adverse health-related quality of life after permanent iodine-125 brachytherapy for localized prostate cancer. *Urology* 2006; 68(1): 104-109.

68. Roach M, 3rd, Chinn DM, Holland J, Clarke M. A pilot survey of sexual function and quality of life following 3D conformal radiotherapy for clinically localized prostate cancer. *Int J Radiat Oncol Biol Phys* 1996; 35(5): 869-874.

69. Sanda MG, Dunn RL, Michalski J, Sandler HM, Northouse L, Hembroff L et al. Quality of life and satisfaction with outcome among prostate-cancer survivors. *N Engl J Med* 2008; 358(12): 1250-1261.

70. Schover LR, Fouladi RT, Warneke CL, Neese L, Klein EA, Zippe C et al. Defining sexual outcomes after treatment for localized prostate carcinoma.[see comment]. *Cancer* 2002; 95(8): 1773-1785.

*Subject: Reasons for excluding PRO studies*

1  
2  
3 71. Soderdahl DW, Davis JW, Schellhammer PF, Given RW, Lynch DF, Shaves M et al.  
4 Prospective longitudinal comparative study of health-related quality of life in patients  
5 undergoing invasive treatments for localized prostate cancer. *Journal of endourology /*  
6 *Endourological Society* 2005; 19(3): 318-326.  
7

8 72. Speight JL, Elkin EP, Pasta DJ, Silva S, Lubeck DP, Carroll PR et al. Longitudinal  
9 assessment of changes in sexual function and bother in patients treated with external beam  
10 radiotherapy or brachytherapy, with and without neoadjuvant androgen ablation: data from  
11 CaPSURE. *Int J Radiat Oncol Biol Phys* 2004; 60(4): 1066-1075.  
12

13 73. Stone NN, Marshall DT, Stone JJ, Cesaretti JA, Stock RG. Does neoadjuvant hormonal  
14 therapy improve urinary function when given to men with large prostates undergoing prostate  
15 brachytherapy? *J Urol* 2010; 183(2): 634-639.  
16

17 74. Trojan L, Harrer K, Schafer J, Voss M, Welzel G, Bolenz C et al. [Complications and side  
18 effects of low dose rate brachytherapy for the treatment of prostate cancer: data on a 13 year  
19 follow-up study from Mannheim]. *Urologe A* 2007; 46(11): 1542-1547.  
20

21 75. Tward JD, Lee CM, Pappas LM, Szabo A, Gaffney DK, Shrieve DC. Survival of men  
22 with clinically localized prostate cancer treated with prostatectomy, brachytherapy, or no  
23 definitive treatment: impact of age at diagnosis. *Cancer* 2006; 107(10): 2392-2400.  
24

25 76. Valicenti RK, Bissondtte EA, Chen C, Theodorescu D. Longitudinal comparison of sexual  
26 function after 3-dimensional conformal radiation therapy or prostate brachytherapy. *J Urol*  
27 2002; 168(6): 2499-2504.  
28

29 77. Van de Poll-Franse LV, Sadetsky N, Kwan L, Litwin MS. Severity of cardiovascular  
30 disease and health-related quality of life in men with prostate cancer: a longitudinal analysis  
31 from CaPSURE. *Qual Life Res* 2008; 17(6): 845-855.  
32

33 78. Wyler SF, Engeler DS, Seelentag W, Ries G, Schmid HP. Health-related quality of life  
34 after radical prostatectomy and low-dose-rate brachytherapy for localized prostate cancer.  
35 *Urol Int* 2009; 82(1): 17-23.  
36

37 79. Zagar TM, Stock RG, Cesaretti JA, Stone NN. Assessment of postbrachytherapy sexual  
38 function: a comparison of the IIEF-5 and the MSEFS. *Brachytherapy* 2007; 6(1): 26-33.  
39  
40  
41  
42  
43  
44  
45  
46  
47  
48  
49  
50  
51  
52  
53  
54  
55  
56  
57  
58  
59  
60



1 *Subject: Reasons for excluding PRO studies*

2  
3 Figure legends

4  
5 Figure 1. Study flow

6 Abbreviation. PICO: population, intervention, comparator, outcome; PRO: patient-reported  
7 outcomes; RCT: randomised controlled trial  
8  
9  
10  
11  
12  
13  
14  
15  
16  
17  
18  
19  
20  
21  
22  
23  
24  
25  
26  
27  
28  
29  
30  
31  
32  
33  
34  
35  
36  
37  
38  
39  
40  
41  
42  
43  
44  
45  
46  
47  
48  
49  
50  
51  
52  
53  
54  
55  
56  
57  
58  
59  
60

For peer review only

*Subject: Reasons for excluding PRO studies*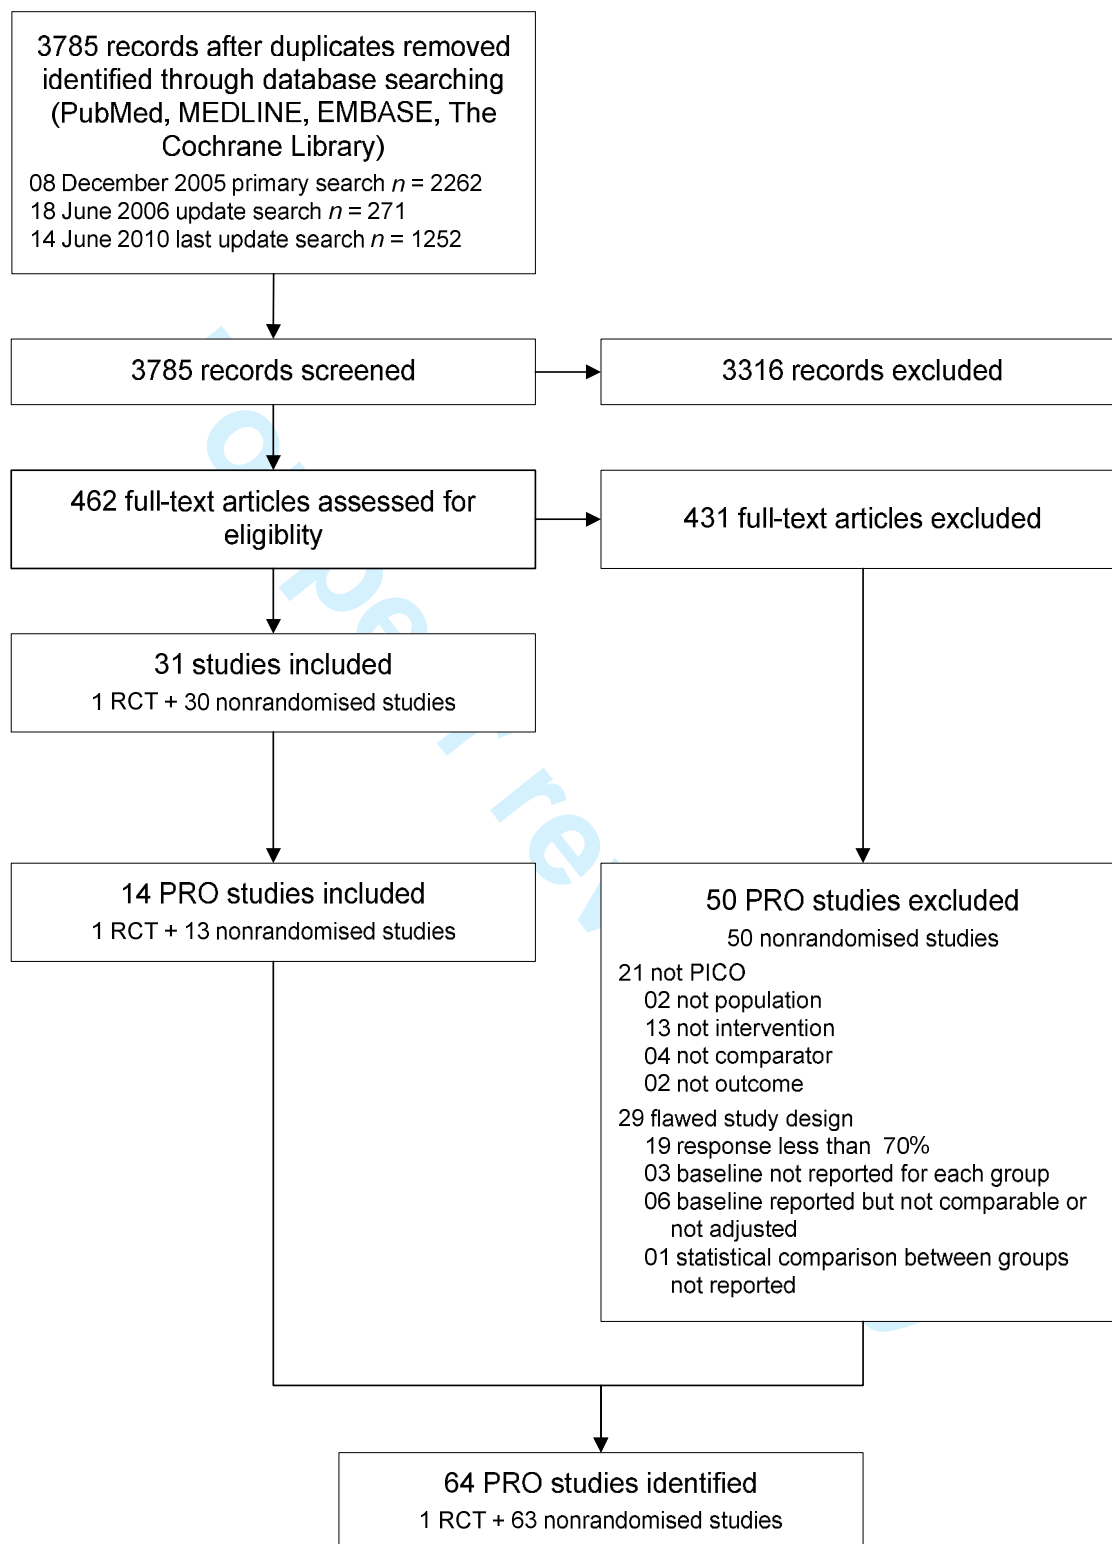

Figure 1. Study flow

1 *Subject: Reasons for excluding PRO studies*

2  
3 Table 1. Search strategy.

4 Database: Ovid MEDLINE(R) In-Process & Other Non-Indexed Citations, Ovid  
5 MEDLINE(R) Daily and Ovid MEDLINE(R) <1950 to Present>

| No | Search term                                                                                            |
|----|--------------------------------------------------------------------------------------------------------|
| 1  | PROSTATIC NEOPLASMS/                                                                                   |
| 2  | (prostat* adj6 (cancer* or carcinom* or tumor* or tumour* or neoplasm* or adenocar-<br>cinom*)).ab,ti. |
| 3  | or/1-2                                                                                                 |
| 4  | BRACHYTHERAPY/                                                                                         |
| 5  | brachytherap*.ab,ti.                                                                                   |
| 6  | ((interstit* or implant*) adj6 (radiation* or radiotherapy*)).ab,ti.                                   |
| 7  | ((seed* or permanent*) adj6 implant*).ab,ti.                                                           |
| 8  | or/4-7                                                                                                 |
| 9  | 3 and 8                                                                                                |
| 10 | RANDOMIZED CONTROLLED TRIAL.pt.                                                                        |
| 11 | CONTROLLED CLINICAL TRIAL.pt.                                                                          |
| 12 | RANDOMIZED CONTROLLED TRIALS AS TOPIC/                                                                 |
| 13 | RANDOM ALLOCATION/                                                                                     |
| 14 | DOUBLE BLIND METHOD/                                                                                   |
| 15 | SINGLE BLIND METHOD/                                                                                   |
| 16 | or/10-15                                                                                               |
| 17 | ANIMAL/ not HUMAN/                                                                                     |
| 18 | 16 not 17                                                                                              |
| 19 | CLINICAL TRIAL.pt.                                                                                     |
| 20 | exp CLINICAL TRIALS AS TOPIC/                                                                          |
| 21 | (clinic* adj25 trial*).tw.                                                                             |
| 22 | ((singl* or doubl* or trebl* or tripl*) adj (blind* or mask*)).tw.                                     |
| 23 | PLACEBOS/                                                                                              |
| 24 | placebo*.tw.                                                                                           |
| 25 | random*.tw.                                                                                            |
| 26 | RESEARCH DESIGN/                                                                                       |
| 27 | (latin adj square).tw.                                                                                 |
| 28 | or/19-27                                                                                               |
| 29 | 28 not 17                                                                                              |
| 30 | 29 not 18                                                                                              |
| 31 | COMPARATIVE STUDY.pt.                                                                                  |
| 32 | exp EVALUATION STUDIES/                                                                                |
| 33 | FOLLOW UP STUDIES/                                                                                     |
| 34 | PROSPECTIVE STUDIES/                                                                                   |
| 35 | (control* or prospectiv* or volunteer*).tw.                                                            |
| 36 | CROSS-OVER STUDIES/                                                                                    |
| 37 | or/31-36                                                                                               |
| 38 | 37 not 17                                                                                              |
| 39 | 38 not (18 or 30)                                                                                      |

*Subject: Reasons for excluding PRO studies*

- 1  
2  
3 40 18 or 30 or 39  
4 41 exp CASE-CONTROL STUDIES/  
5 42 exp COHORT STUDIES/  
6  
7 43 ((compare\* or comparison\* or versus or evaluation or follow up or case-control\*) adj8  
8 (stud\* or trial\* or analy\*).ab,ti.  
9 44 ((cohort\* or observation\* or intervention\*) adj3 (stud\* or trial\* or analy\*).ab,ti.  
10 45 exp CONTROL GROUPS/  
11 46 exp MULTICENTER STUDIES/  
12 47 (multi center adj3 stud\*).ab,ti.  
13 48 or/41-47  
14 49 40 or 48  
15 50 search\*.tw. or META ANALYSIS.mp.pt. or REVIEW.pt.  
16 51 9 and (49 or 50)
-

Subject: Reasons for excluding PRO studies

Table 1. Reasons for excluding PRO articles

| Nonrandomized studies | Inclusion criteria |     |     |     | Requirements to contain high risk of bias |                        |                                        |                                             | Comments                     |
|-----------------------|--------------------|-----|-----|-----|-------------------------------------------|------------------------|----------------------------------------|---------------------------------------------|------------------------------|
|                       | P                  | I   | C   | O   | Response<br>≥70%                          | Baseline each<br>group | Baseline<br>comparable/<br>or adjusted | Statistical<br>comparison<br>between groups |                              |
| Bacon 2001 [30]       | yes                | yes | NO  | -   | -                                         | -                      | -                                      | -                                           | No concurrent group          |
| Ball 2006 [31]        | yes                | yes | NO  | -   | -                                         | -                      | -                                      | -                                           | Cryotherapy                  |
| Befort 2005 [32]      | yes                | yes | yes | yes | NO                                        | -                      | -                                      | -                                           | Low response                 |
| Bergman 2009 [33]     | yes                | yes | yes | yes | yes                                       | yes                    | yes                                    | NO                                          | No appropriate test          |
| Bergman 2010 [34]     | yes                | yes | yes | yes | NO                                        | -                      | -                                      | -                                           | Low response                 |
| Brandeis 2000 [35]    | yes                | NO  | -   | -   | -                                         | -                      | -                                      | -                                           | 29% LDR-BT + EBRT            |
| Brown 2007 [36]       | yes                | NO  | -   | -   | -                                         | -                      | -                                      | -                                           | EBRT                         |
| Burnett 2007 [37]     | yes                | yes | yes | yes | NO                                        | -                      | -                                      | -                                           | Response not reported        |
| Chaikin 1996 [38]     | NO                 | -   | -   | -   | -                                         | -                      | -                                      | -                                           | Staging not reported         |
| Chen 2009 [39]        | yes                | yes | yes | yes | yes                                       | yes                    | NO                                     | -                                           | No confounder control        |
| Choo 2010 [40]        | yes                | yes | yes | yes | yes                                       | NO                     | -                                      | -                                           | Baseline not reported        |
| Clark 2003 [41]       | yes                | yes | yes | yes | NO                                        | -                      | -                                      | -                                           | Low response                 |
| Downs 2003 [42]       | yes                | yes | yes | yes | yes                                       | yes                    | NO                                     | -                                           | No confounder control        |
| Eton 2001 [43]        | yes                | yes | yes | yes | NO                                        | -                      | -                                      | -                                           | Low response                 |
| Frank 2007 [44]       | yes                | yes | yes | yes | NO                                        | -                      | -                                      | -                                           | Low response                 |
| Fulmer 2001 [45]      | yes                | yes | yes | yes | NO                                        | -                      | -                                      | -                                           | Response not reported        |
| Gore 2009 [46]        | yes                | yes | yes | yes | NO                                        | -                      | -                                      | -                                           | Low response                 |
| Guedea 2009 [47]      | yes                | yes | yes | yes | yes                                       | yes                    | NO                                     | -                                           | No confounder control        |
| Hashine 2008 [48]     | yes                | yes | yes | yes | yes                                       | yes                    | NO                                     | -                                           | No confounder control        |
| Hashine 2009 [49]     | yes                | yes | yes | yes | yes                                       | yes                    | NO                                     | -                                           | No confounder control        |
| Hervouet 2005 [50]    | NO                 | -   | -   | -   | -                                         | -                      | -                                      | -                                           | ≥20% T3-T4 in control groups |
| Hollenbeck 2002 [51]  | yes                | NO  | -   | -   | -                                         | -                      | -                                      | -                                           | LDR-BT + EBRT                |
| Jo 2005 [52]          | yes                | NO  | -   | -   | -                                         | -                      | -                                      | -                                           | High-dose rate brachytherapy |
| Johnstone 2000 [53]   | yes                | NO  | -   | -   | -                                         | -                      | -                                      | -                                           | EBRT                         |
| Joly 1998 [54]        | yes                | NO  | -   | -   | -                                         | -                      | -                                      | -                                           | LDR-BT + EBRT                |
| Kakehi 2007 [55]      | yes                | yes | yes | yes | yes                                       | NO                     | -                                      | -                                           | Baseline not reported        |
| Lev 2009 [56]         | yes                | NO  | -   | -   | -                                         | -                      | -                                      | -                                           | LDR-BT + EBRT                |
| Lilleby 1999 [57]     | yes                | NO  | -   | -   | -                                         | -                      | -                                      | -                                           | EBRT                         |
| Litwin 2004 [58]      | yes                | yes | yes | yes | NO                                        | -                      | -                                      | -                                           | Low response                 |
| Litwin 2007 [59]      | yes                | NO  | -   | -   | -                                         | -                      | -                                      | -                                           | 25% LDR-BT + EBRT            |
| Mehta 2003 [60]       | yes                | yes | yes | NO  | -                                         | -                      | -                                      | -                                           | "Fear of cancer"             |

## Subject: Reasons for excluding PRO studies

| Nonrandomized studies   | Inclusion criteria |     |     |     | Requirements to contain high risk of bias |                        |                                        |                                             | Comments                       |
|-------------------------|--------------------|-----|-----|-----|-------------------------------------------|------------------------|----------------------------------------|---------------------------------------------|--------------------------------|
|                         | P                  | I   | C   | O   | Response<br>≥70%                          | Baseline each<br>group | Baseline<br>comparable/<br>or adjusted | Statistical<br>comparison<br>between groups |                                |
| Miller 2005 [61]        | yes                | NO  | -   | -   | -                                         | -                      | -                                      | -                                           | 44% LDR-BT + EBRT              |
| Miller 2006 [62]        | yes                | yes | yes | yes | yes                                       | NO                     | -                                      | -                                           | Baseline not reported          |
| Monahan 2007 [63]       | yes                | yes | yes | yes | NO                                        | -                      | -                                      | -                                           | Low response                   |
| Namiki 2006 [64]        | yes                | yes | yes | yes | NO                                        | -                      | -                                      | -                                           | Low response                   |
| Namiki 2009 [65]        | yes                | yes | yes | yes | NO                                        | -                      | -                                      | -                                           | Low response                   |
| Ohashi 2006 [66]        | yes                | yes | yes | yes | NO                                        | -                      | -                                      | -                                           | Low response                   |
| Pinkawa 2006 [67]       | yes                | yes | NO  | -   | -                                         | -                      | -                                      | -                                           | LDR-BT + hormones <sup>†</sup> |
| Roach 1996 [68]         | yes                | NO  | -   | -   | -                                         | -                      | -                                      | -                                           | EBRT, single-arm trial         |
| Sanda 2008 [69]         | yes                | yes | yes | yes | NO                                        | -                      | -                                      | -                                           | Low response                   |
| Schover 2002 [70]       | yes                | yes | yes | yes | NO                                        | -                      | -                                      | -                                           | Low response                   |
| Soderdahl 2005 [71]     | yes                | yes | yes | yes | NO                                        | -                      | -                                      | -                                           | Low response                   |
| Speight 2004 [72]       | yes                | yes | yes | yes | NO                                        | -                      | -                                      | -                                           | Response not reported          |
| Stone 2010 [73]         | yes                | yes | NO  | -   | -                                         | -                      | -                                      | -                                           | LDR-BT + hormones <sup>†</sup> |
| Trojan 2007 [74]        | yes                | yes | yes | yes | NO                                        | -                      | -                                      | -                                           | Low response                   |
| Tward 2006 [75]         | yes                | yes | yes | NO  | -                                         | -                      | -                                      | -                                           | Mortality differs <sup>§</sup> |
| Valicenti 2002 [76]     | yes                | yes | yes | yes | NO                                        | -                      | -                                      | -                                           | Response not reported          |
| Van de Poll-F 2008 [77] | yes                | NO  | -   | -   | -                                         | -                      | -                                      | -                                           | LDR-BT + EBRT                  |
| Wyler 2009 [78]         | yes                | yes | yes | yes | yes                                       | yes                    | NO                                     | -                                           | No confounder control          |
| Zagar 2007 [79]         | yes                | NO  | -   | -   | -                                         | -                      | -                                      | -                                           | LDR-BT + EBRT                  |
| "NO" counts             | 2                  | 13  | 4   | 2   | 19                                        | 3                      | 6                                      | 1                                           | Total: 50 studies              |
|                         | PICO not met: 21   |     |     |     | High risk of bias: 29                     |                        |                                        |                                             |                                |

-: not appropriate

\*Mehta 2003: no appropriate endpoint

<sup>†</sup>Pinkawa 2006; Stone 2010: neoadjuvant hormonal therapy

<sup>§</sup>Tward 2006: non-disease-related mortality differs greatly

Abbreviations: C: comparison of interest is radical prostatectomy, external beam radiotherapy, or no primary therapy; EBRT: external beam radiotherapy; I: intervention of interest is low-dose rate brachytherapy as monotherapy; LDR-BT: low-dose rate brachytherapy; O: outcome of interest is function, bother, or generic health-related quality of life; P: patients with localized prostate cancer; PRO: patient-reported outcomes

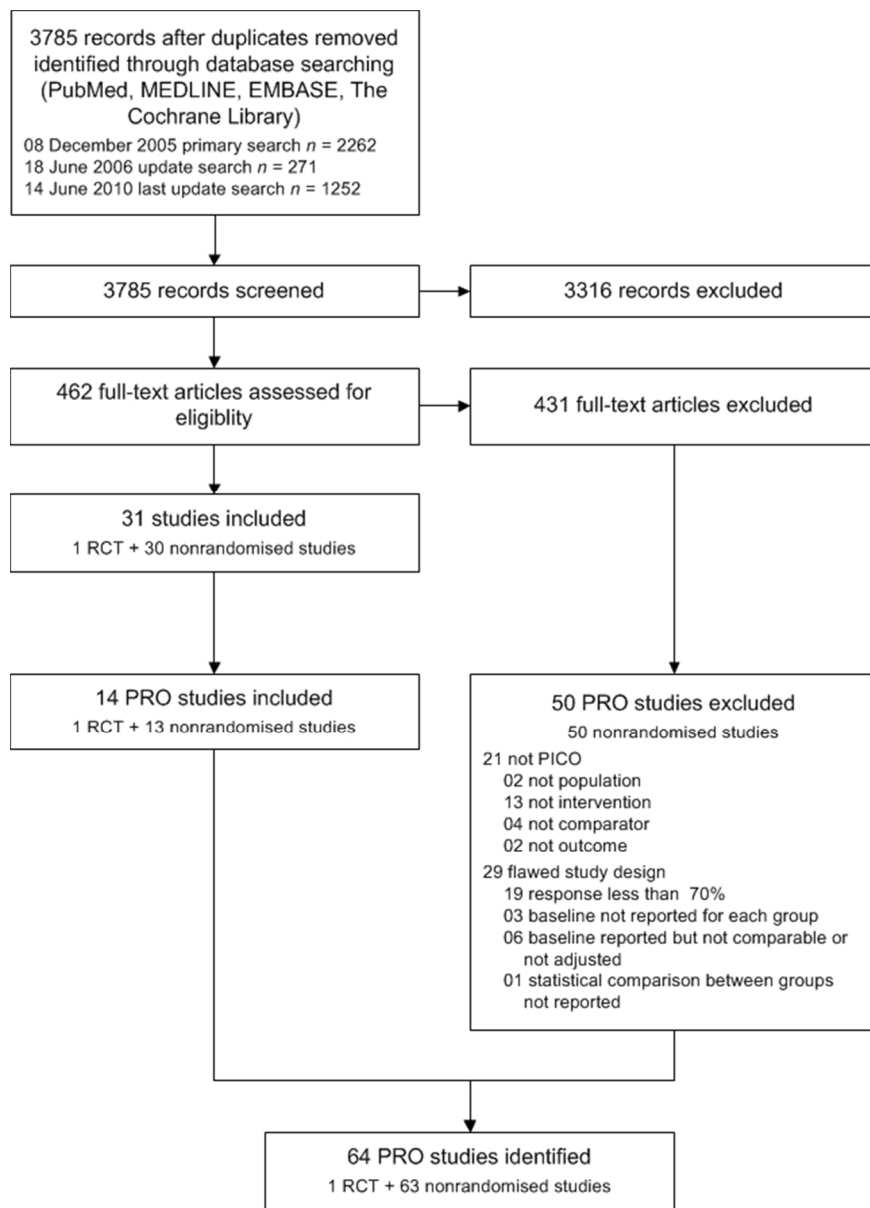

Study flow  
170x235mm (96 x 96 DPI)

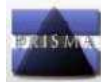

# PRISMA 2009 Checklist

| Section/topic                      | #  | Checklist item                                                                                                                                                                                                                                                                                              | Reported on page # |
|------------------------------------|----|-------------------------------------------------------------------------------------------------------------------------------------------------------------------------------------------------------------------------------------------------------------------------------------------------------------|--------------------|
| <b>TITLE</b>                       |    |                                                                                                                                                                                                                                                                                                             |                    |
| Title                              | 1  | Identify the report as a systematic review, meta-analysis, or both.                                                                                                                                                                                                                                         | 1                  |
| <b>ABSTRACT</b>                    |    |                                                                                                                                                                                                                                                                                                             |                    |
| Structured summary                 | 2  | Provide a structured summary including, as applicable: background; objectives; data sources; study eligibility criteria, participants, and interventions; study appraisal and synthesis methods; results; limitations; conclusions and implications of key findings; systematic review registration number. | 2-3                |
| <b>INTRODUCTION</b>                |    |                                                                                                                                                                                                                                                                                                             |                    |
| Rationale                          | 3  | Describe the rationale for the review in the context of what is already known.                                                                                                                                                                                                                              | 4                  |
| Objectives                         | 4  | Provide an explicit statement of questions being addressed with reference to participants, interventions, comparisons, outcomes, and study design (PICOS).                                                                                                                                                  | 4-5                |
| <b>METHODS</b>                     |    |                                                                                                                                                                                                                                                                                                             |                    |
| Protocol and registration          | 5  | Indicate if a review protocol exists, if and where it can be accessed (e.g., Web address), and, if available, provide registration information including registration number.                                                                                                                               | none               |
| Eligibility criteria               | 6  | Specify study characteristics (e.g., PICOS, length of follow-up) and report characteristics (e.g., years considered, language, publication status) used as criteria for eligibility, giving rationale.                                                                                                      | 6-8                |
| Information sources                | 7  | Describe all information sources (e.g., databases with dates of coverage, contact with study authors to identify additional studies) in the search and date last searched.                                                                                                                                  | 8                  |
| Search                             | 8  | Present full electronic search strategy for at least one database, including any limits used, such that it could be repeated.                                                                                                                                                                               | table 1            |
| Study selection                    | 9  | State the process for selecting studies (i.e., screening, eligibility, included in systematic review, and, if applicable, included in the meta-analysis).                                                                                                                                                   | 8                  |
| Data collection process            | 10 | Describe method of data extraction from reports (e.g., piloted forms, independently, in duplicate) and any processes for obtaining and confirming data from investigators.                                                                                                                                  | 8-9                |
| Data items                         | 11 | List and define all variables for which data were sought (e.g., PICOS, funding sources) and any assumptions and simplifications made.                                                                                                                                                                       | 8-9                |
| Risk of bias in individual studies | 12 | Describe methods used for assessing risk of bias of individual studies (including specification of whether this was done at the study or outcome level), and how this information is to be used in any data synthesis.                                                                                      | 9                  |
| Summary measures                   | 13 | State the principal summary measures (e.g., risk ratio, difference in means).                                                                                                                                                                                                                               | 9                  |
| Synthesis of results               | 14 | Describe the methods of handling data and combining results of studies, if done, including measures of consistency (e.g., $I^2$ for each meta-analysis)                                                                                                                                                     | 9                  |



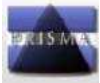

# PRISMA 2009 Checklist

Page 1 of 2

| Section/topic                 | #  | Checklist item                                                                                                                                                                                           | Reported on page # |
|-------------------------------|----|----------------------------------------------------------------------------------------------------------------------------------------------------------------------------------------------------------|--------------------|
| Risk of bias across studies   | 15 | Specify any assessment of risk of bias that may affect the cumulative evidence (e.g., publication bias, selective reporting within studies).                                                             | none               |
| Additional analyses           | 16 | Describe methods of additional analyses (e.g., sensitivity or subgroup analyses, meta-regression), if done, indicating which were pre-specified.                                                         | none               |
| <b>RESULTS</b>                |    |                                                                                                                                                                                                          |                    |
| Study selection               | 17 | Give numbers of studies screened, assessed for eligibility, and included in the review, with reasons for exclusions at each stage, ideally with a flow diagram.                                          | figure 1           |
| Study characteristics         | 18 | For each study, present characteristics for which data were extracted (e.g., study size, PICOS, follow-up period) and provide the citations.                                                             | table 2            |
| Risk of bias within studies   | 19 | Present data on risk of bias of each study and, if available, any outcome level assessment (see item 12).                                                                                                | none               |
| Results of individual studies | 20 | For all outcomes considered (benefits or harms), present, for each study: (a) simple summary data for each intervention group (b) effect estimates and confidence intervals, ideally with a forest plot. | 10                 |
| Synthesis of results          | 21 | Present results of each meta-analysis done, including confidence intervals and measures of consistency.                                                                                                  | none               |
| Risk of bias across studies   | 22 | Present results of any assessment of risk of bias across studies (see Item 15).                                                                                                                          | none               |
| Additional analysis           | 23 | Give results of additional analyses, if done (e.g., sensitivity or subgroup analyses, meta-regression [see Item 16]).                                                                                    | none               |
| <b>DISCUSSION</b>             |    |                                                                                                                                                                                                          |                    |
| Summary of evidence           | 24 | Summarize the main findings including the strength of evidence for each main outcome; consider their relevance to key groups (e.g., healthcare providers, users, and policy makers).                     | 11                 |
| Limitations                   | 25 | Discuss limitations at study and outcome level (e.g., risk of bias), and at review-level (e.g., incomplete retrieval of identified research, reporting bias).                                            | 11-14              |
| Conclusions                   | 26 | Provide a general interpretation of the results in the context of other evidence, and implications for future research.                                                                                  | 11-14              |
| <b>FUNDING</b>                |    |                                                                                                                                                                                                          |                    |
| Funding                       | 27 | Describe sources of funding for the systematic review and other support (e.g., supply of data); role of funders for the systematic review.                                                               | 15                 |

From: Moher D, Liberati A, Tetzlaff J, Altman DG, The PRISMA Group (2009). Preferred Reporting Items for Systematic Reviews and Meta-Analyses: The PRISMA Statement. PLoS Med 6(6): e1000097. doi:10.1371/journal.pmed1000097

For more information, visit: [www.prisma-statement.org](http://www.prisma-statement.org).

Page 2 of 2  
For peer review only - <http://bmjopen.bmj.com/site/about/guidelines.xhtml>

# BMJ Open

## Failure to address potential bias in nonrandomized controlled clinical trials may cause lack of evidence on patient-reported outcomes - a method study

|                                 |                                                                                                                                                                                                                                                                                                                                    |
|---------------------------------|------------------------------------------------------------------------------------------------------------------------------------------------------------------------------------------------------------------------------------------------------------------------------------------------------------------------------------|
| Journal:                        | <i>BMJ Open</i>                                                                                                                                                                                                                                                                                                                    |
| Manuscript ID:                  | bmjopen-2013-004720.R1                                                                                                                                                                                                                                                                                                             |
| Article Type:                   | Research                                                                                                                                                                                                                                                                                                                           |
| Date Submitted by the Author:   | 28-Apr-2014                                                                                                                                                                                                                                                                                                                        |
| Complete List of Authors:       | Peinemann, Frank; Children's Hospital, University of Cologne, Kerpener Str. 62, 50937 Cologne, Germany, Labeit, Alexander; University of Illinois, Outcomes Research Center Thielscher, Christian; FOM University of Applied Science for Economics & Management, Pinkawa, Michael; University Hospital, Department of Radiotherapy |
| <b>Primary Subject Heading</b>: | Evidence based practice                                                                                                                                                                                                                                                                                                            |
| Secondary Subject Heading:      | Urology, Patient-centred medicine, Evidence based practice                                                                                                                                                                                                                                                                         |
| Keywords:                       | Adult surgery < SURGERY, Radiation oncology < RADIOTHERAPY, Urological tumours < ONCOLOGY                                                                                                                                                                                                                                          |
|                                 |                                                                                                                                                                                                                                                                                                                                    |

SCHOLARONE™  
Manuscripts

1 *Subject: bmjopen-2013-004720.R1.: Failure to address potential bias in CCT*

2  
3  
4 Failure to address potential bias in nonrandomized controlled clinical trials may cause lack of  
5  
6 evidence on patient-reported outcomes – a method study  
7

8  
9 Frank Peinemann,<sup>1,\*</sup> Alexander Michael Labeit,<sup>2</sup> Christian Thielscher,<sup>3</sup> Michael Pinkawa,<sup>4</sup>

10  
11 <sup>1</sup>Children's Hospital, University of Cologne, Kerpener Str. 62, 50937 Cologne, Germany

12 <sup>2</sup>Outcomes Research Center, University of Illinois, One Illini Drive, Peoria, IL 61656, USA

13 <sup>3</sup>FOM University of Applied Science for Economics & Management, Leimkugelstr. 6, 45141  
14  
15 Essen, Germany

16  
17 <sup>4</sup>Department of Radiotherapy, University Hospital, Pauwelsstr. 30, 52074 Aachen, Germany

18  
19  
20  
21 FP: [pubmedprjournal@gmail.com](mailto:pubmedprjournal@gmail.com)

22  
23 AML: [alabeit.publications@gmail.com](mailto:alabeit.publications@gmail.com)

24  
25 CT: [christian.thielscher@fom.de](mailto:christian.thielscher@fom.de)

26  
27 MP: [mpinkawa@ukaachen.de](mailto:mpinkawa@ukaachen.de)

28  
29  
30  
31  
32  
33 \*Corresponding author: Frank Peinemann, M.D., M.Sc., Children's Hospital, University of  
34 Cologne, Kerpener Str. 62, 50937 Cologne, Germany; e-mail: [pubmedprjournal@gmail.com](mailto:pubmedprjournal@gmail.com).  
35  
36 Phone: +49-176-31130745.  
37

38  
39  
40 Word count, excluding title page, abstract, references, figures and tables: 6102  
41  
42  
43  
44  
45  
46  
47  
48  
49  
50  
51  
52  
53  
54  
55  
56  
57  
58  
59  
60

1  
2  
3  
4  
5  
6  
7  
8  
9  
10  
11  
12  
13  
14  
15  
16  
17  
18  
19  
20  
21  
22  
23  
24  
25  
26  
27  
28  
29  
30  
31  
32  
33  
34  
35  
36  
37  
38  
39  
40  
41  
42  
43  
44  
45  
46  
47  
48  
49  
50  
51  
52  
53  
54  
55  
56  
57  
58  
59  
60

*Subject: bmjopen-2013-004720.R1.: Failure to address potential bias in CCT*

## Abstract

Objectives: We conducted a workup of a previously published systematic review and aimed to analyse why most of the identified nonrandomized controlled clinical trials with patient-reported outcomes did not match a set of basic quality criteria.

Setting: There were no limits on the level of care and the geographical location.

Participants: The review evaluated permanent interstitial low-dose rate brachytherapy in patients with localized prostate cancer and compared that intervention to alternative procedures such as external beam radiotherapy, radical prostatectomy, and no primary therapy.

Primary outcome measure: Fulfilment of basic inclusion criteria according to a PICO framework and accomplishment of requirements to contain superimposed risk of bias.

Results: We found that 21 of 50 excluded nonrandomized controlled trials did not meet PICO inclusion criteria. The rest of 29 of 50 studies lacked quality of reporting. The resulting flaws included attrition bias due to loss of follow-up, lack of reporting baseline data, potential confounding due to unadjusted data and lack of statistical comparison between groups.

Conclusions: With respect to the reporting of patient-reported outcomes, active efforts are required to improve the quality of reporting in nonrandomized controlled trials concerning permanent interstitial low-dose rate brachytherapy in patients with localized prostate cancer.

1 *Subject: bmjopen-2013-004720.R1.: Failure to address potential bias in CCT*

2

3

4

5

6

7

8

9

10

11

12

13

14

15

16

17

18

19

20

21

22

23

24

25

26

27

28

29

30

31

32

33

34

35

36

37

38

39

40

41

42

43

44

45

46

47

48

49

50

51

52

53

54

55

56

57

58

59

60

Key words: systematic review, patient-reported outcome, risk of bias

### Strengths and limitations of this study

- We conducted a comprehensive literature search and strictly adhered to the projected methodology.
- We identified a lack of quality in nonrandomized controlled clinical trials reporting patient-reported outcomes, analysed the cause, and suggested possible improvements in designing studies in the future.
- The analysis is confined to a single disease and a specific treatment and conclusions drawn from its results may not be generalizable to other diseases and treatments.
- The limits for the inclusion of studies are arbitrarily set.

1  
2  
3  
4  
5  
6  
7  
8  
9  
10  
11  
12  
13  
14  
15  
16  
17  
18  
19  
20  
21  
22  
23  
24  
25  
26  
27  
28  
29  
30  
31  
32  
33  
34  
35  
36  
37  
38  
39  
40  
41  
42  
43  
44  
45  
46  
47  
48  
49  
50  
51  
52  
53  
54  
55  
56  
57  
58  
59  
60

*Subject: bmjopen-2013-004720.R1.: Failure to address potential bias in CCT*

| <b>Abbreviation</b> | <b>Term</b>                                                                        |
|---------------------|------------------------------------------------------------------------------------|
| CCT                 | Nonrandomized controlled clinical trial                                            |
| CONSORT             | Consolidated standards of reporting trials                                         |
| EBRT                | External beam radiotherapy                                                         |
| EMBASE              | Excerpta medica database                                                           |
| LDR-BT              | Permanent interstitial low-dose rate brachytherapy                                 |
| MEDLINE             | Medical literature analysis and retrieval system online                            |
| PICO<br>(TS-SD)     | Participants, intervention, comparator, outcome<br>(timing, setting, study design) |
| PRO                 | Patient-reported outcome                                                           |
| RCT                 | Randomized controlled trial                                                        |
| STROBE              | Strengthening the reporting of observational studies in epidemiology               |
| TNM                 | Tumor-Node-Metastasis                                                              |

Subject: *bmjopen-2013-004720.R1.: Failure to address potential bias in CCT*

## Introduction

The present paper reports a workup of a previously published systematic review [1]. It may be regarded as a methodological supplement adding information on a subset of excluded studies. We have compared permanent interstitial low-dose rate brachytherapy, with radical prostatectomy, external beam radiotherapy, and 'no primary therapy' in patients with localized prostate cancer categorized T1 to T2. We used the term 'no primary therapy' to accommodate different types of observation including active surveillance, watchful waiting, and observing without a distinctive management. As a result, we included one randomized controlled trial (RCT) and 30 nonrandomized controlled clinical trials (CCT). The primary outcome was overall survival. The secondary outcomes were clinically defined disease-free survival, biochemical recurrence-free survival, physician-reported severe adverse events, and patient-reported outcomes such as function and bother scores as well as generic and disease-related health-related quality of life. We concluded that the current evidence is insufficient to allow a definitive conclusion about overall survival. Radical prostatectomy and external beam radiotherapy can severely affect the structural integrity of neighboring organs and their functions and can cause considerable long-term impairment of health-related quality of life. In a view of expecting similar survival but a tremendous difference of adverse events between treatment alternatives, valid data on health-related quality of life could tip the balance. At least, we assume that shared-decision making and consideration of patients' preferences in searching for the best individual treatment would rely on information on health-related quality of life data. Of the 30 included nonrandomized studies, 13 studies reported patient-reported outcomes (PROs), that is, only the patients provided the information [2]. During the study selection process, we experienced that we excluded another 50 nonrandomized PRO studies. We found it a pity that we could not use the many data. We had the impression that a considerable number of studies were excluded because of lack in reporting quality. Therefore,

1 *Subject: bmjopen-2013-004720.R1.: Failure to address potential bias in CCT*

2  
3 we wanted to summarize the reasons for excluding those PRO studies and make aware that  
4  
5 authors of PRO studies should meet some basic requirements for reporting of comparative  
6  
7 PRO data to achieve higher acceptance in the scientific community. The importance of  
8  
9 reporting PRO has been addressed by the Consolidated Standards of Reporting Trials  
10  
11 (CONSORT) group [3] that recently has published a PRO extension to their acclaimed  
12  
13 previous statement [4]. It may be wise to build a PRO extension to the STrengthening the  
14  
15 Reporting of OBServational studies in Epidemiology (STROBE) statement [5] that addresses  
16  
17 specific issues of observational studies.  
18  
19

20  
21 The first aim of this study was to assess whether the excluded studies met the basic inclusion  
22  
23 criteria using the PICO framework. The second aim of this study was whether the excluded  
24  
25 studies met requirements to contain high risk of bias.  
26  
27  
28  
29  
30  
31  
32  
33  
34  
35  
36  
37  
38  
39  
40  
41  
42  
43  
44  
45  
46  
47  
48  
49  
50  
51  
52  
53  
54  
55  
56  
57  
58  
59  
60



1 *Subject: bmjopen-2013-004720.R1.: Failure to address potential bias in CCT*

## 2 3 **Materials and Methods**

### 4 5 6 **Study inclusion criteria**

7  
8  
9  
10 We defined the inclusion criteria according to the PICO framework that should include four  
11 essential constituents, that is, the type of participants (P), intervention (I), comparator (C), and  
12 outcome (O) [6]. The four PICO items can be supplemented by timing (T) and setting (S), two  
13 other important features of a systematic review, to create the so-called PICOTS typology [7].  
14  
15 A further extension embraces the study design (SD) to complete all major items of a search  
16 strategy (PICOTS-SD) [8].  
17  
18  
19  
20  
21  
22

### 23 24 *Population*

25  
26  
27 Initial and present publication: Localized prostate cancer is defined by the categories T1 to T2  
28 of the Tumor-Node-Metastasis (TNM) staging system [9] if combined with an absence of  
29 both regional lymph node metastasis and distant metastasis.  
30  
31  
32  
33

### 34 35 *Intervention*

36  
37  
38 Initial and present publication: Brachytherapy [10] is short-distance radiotherapy placing  
39 radiation sources with different duration and rates of dose delivery in or near tumors [11].  
40  
41 Permanent interstitial low-dose rate brachytherapy means implanting of low-energy  
42 radioactive sources emitting radiation, which are contained in titanium pellets of the size of  
43 rice grains called seeds [12].  
44  
45  
46  
47  
48  
49

### 50 51 *Comparator*

52  
53  
54 Initial and present publication: The European Association of Urology suggested 3 different  
55 treatment concepts for localized prostate cancer in addition to permanent interstitial low-dose  
56 rate brachytherapy [10]: Radical prostatectomy, external beam radiotherapy, and different  
57  
58  
59  
60

1 *Subject: bmjopen-2013-004720.R1.: Failure to address potential bias in CCT*

2 types of observation including active surveillance, watchful waiting, and observing without a  
3  
4 distinctive management.  
5  
6

7  
8 *Outcome*  
9

10  
11 Initial publication: Overall survival, cancer-specific survival, disease-free survival,  
12 biochemical recurrence-free survival, severe adverse events, and patient-reported outcomes.  
13 Patient-reported outcomes comprised function and bother scores as well as generic and  
14 disease-related health-related quality of life.  
15  
16  
17  
18  
19

20  
21 Present publication: Fulfilment of basic inclusion criteria according to a PICO framework by  
22 the excluded CCT. Accomplishment of requirements to contain superimposed risk of bias in  
23 addition to the high risk of bias caused by the lack of randomization framework by the  
24 excluded CCT.  
25  
26  
27  
28  
29

30  
31 *Timing*  
32

33  
34 Initial and present publication: We did not set limits on the length of the observation period.  
35  
36

37  
38 *Setting*  
39

40  
41 Initial and present publication: We did not set limits on the setting such as type of country,  
42 year of recruitment, or level of health care.  
43  
44

45  
46 *Study design*  
47

48  
49 Initial publication: We included RCT and CCT evaluating permanent interstitial low-dose rate  
50 brachytherapy as monotherapy in patients with localized prostate cancer. The proportion of  
51 relevant patients was required to be at least 80% of the study population and the response rate  
52 of questionnaires was expected to be at least 70%. For CCT to be included, comparable base-  
53  
54  
55  
56  
57  
58  
59  
60

1 *Subject: bmjopen-2013-004720.R1.: Failure to address potential bias in CCT*

2  
3 line characteristics between treatment groups or adjustment for imbalances of these data were  
4  
5 required. Limits on year of publication or language were not applied.  
6  
7

8 Present publication: We included specifically the CCT that were excluded in the initial  
9  
10 publication.  
11

### 12 13 **Search strategy**

14  
15  
16  
17 The search strategy was reported previously [1].  
18  
19

### 20 **Study selection**

21  
22  
23 In the present study, we selected only those 50 nonrandomized studies on PRO that were ex-  
24  
25 cluded from the evaluation in the initial publication. In the study selection process, two re-  
26  
27 viewers independently judged whether a study was included or excluded. Differences were  
28  
29 resolved by discussion without the need for a third opinion.  
30  
31

### 32 **Data collection and analysis**

33  
34  
35  
36 The reasons for exclusion were extracted independently by two reviewers. We sought for the  
37  
38 following data: the inclusion criteria using the PICO framework, the proportion of response of  
39  
40 participants to questionnaires, which was required to be at least 70%, the reporting of separate  
41  
42 baseline characteristics for each treatment group, the reporting of comparable baseline charac-  
43  
44 teristics or adjustment for imbalances of these data such as the use of a Cox proportional haz-  
45  
46 ard model, and the reporting of statistics comparing treatment groups. Sufficient comparabil-  
47  
48 ity was defined as a difference between baseline values that were not statistically significant.  
49  
50 If a statistical test was not reported, we assumed two comparable values if the greater of the  
51  
52 two values was less than 10% above the smaller one. We also required that authors reported  
53  
54 effect measures and statistics testing the difference between treatment groups, for example, p-  
55  
56  
57  
58  
59  
60

1 *Subject: bmjopen-2013-004720.R1.: Failure to address potential bias in CCT*

2 values or effect measures including 95% confidence intervals. Reporting of within group  
3 comparisons or before-and-after analyses was not deemed sufficient for inclusion. We did not  
4 apply a principal summary measure as we aimed at synthesize the information in a qualitative  
5 way.  
6  
7  
8  
9  
10

### 11 **Assessment of risk of bias and quality of reporting**

12  
13 Two reviewers independently assessed the quality of reporting of CCT according to the crite-  
14 ria specified in the previous paragraph. We did not specifically assess the risk of bias because  
15 we decided to exclude all papers with regard to a lack of reporting essential data.  
16  
17  
18  
19  
20  
21  
22  
23  
24  
25  
26  
27  
28  
29  
30  
31  
32  
33  
34  
35  
36  
37  
38  
39  
40  
41  
42  
43  
44  
45  
46  
47  
48  
49  
50  
51  
52  
53  
54  
55  
56  
57  
58  
59  
60

1 *Subject: bmjopen-2013-004720.R1.: Failure to address potential bias in CCT*

## 2 3 **Results**

4  
5  
6  
7 Of a total of 462 full-text articles assessed for eligibility in the previously published systemat-  
8  
9 ic review, 31 studies were included and 431 studies were excluded. Among the 431 excluded  
10  
11 articles, we identified 50 nonrandomised studies that were reporting on PRO (Figure 1). We  
12  
13 evaluated the reasons for exclusion of those 50 studies and documented the results in Table 1.  
14  
15 In 42% (21 of 50) studies, simply the essential PICO framework was not met. In the majority  
16  
17 of 58% (29 of 50) studies, the predefined requirement to apply measures to contain high risk  
18  
19 of bias was not met. Of these 29 studies, 19 studies reported a proportion of patients respond-  
20  
21 ing to questionnaires of less than 70% or did not address this item. Baseline characteristics  
22  
23 were not presented for treatment groups in 3 studies. In another 6 studies, baseline character-  
24  
25 istics were not comparable between treatment groups or there was no confounder control in  
26  
27 the analysis adjusting for important different factors such as mean age. The statistical compar-  
28  
29 ison between treatment groups was deemed not appropriate in 1 study.  
30  
31  
32  
33  
34  
35  
36  
37  
38  
39  
40  
41  
42  
43  
44  
45  
46  
47  
48  
49  
50  
51  
52  
53  
54  
55  
56  
57  
58  
59  
60

1  
2  
3  
4  
5  
6  
7  
8  
9  
10  
11  
12  
13  
14  
15  
16  
17  
18  
19  
20  
21  
22  
23  
24  
25  
26  
27  
28  
29  
30  
31  
32  
33  
34  
35  
36  
37  
38  
39  
40  
41  
42  
43  
44  
45  
46  
47  
48  
49  
50  
51  
52  
53  
54  
55  
56  
57  
58  
59  
60

*Subject: bmjopen-2013-004720.R1.: Failure to address potential bias in CCT*

## Discussion

### Main results

In summary, we found that roughly 4 of 10 excluded PRO studies did not meet the essential inclusion criteria using the PICO framework. This result is consistent with the problem of information retrieval aiming at a high recall and ending up with a low precision. The papers were obviously not relevant to the research question and we did not further examine the reporting quality. We also found that roughly 6 of 10 excluded PRO studies met the PICO framework but did not provide predefined requirements to care sufficiently enough for a low response of patients to questionnaires, for reporting baseline characteristics between treatment groups, for adjusting differences in those baseline characteristics between treatment groups, and to use appropriate statistics to compare the outcome between treatment groups.

### Quality of reporting of patient-reported outcomes

We identified a lack of quality of reporting in many excluded CCT and we want to stress the importance of considering a series of requirements while conducting a study on PRO. Other authors have reported recently that, concerning disease-specific mortality or disease-free survival, available studies did not show significant differences between treatment groups. [13 14]. In view of unknown or small differences in survival measures, the results of patient-reported outcomes studies could have a noticeable impact on medical decision making [15 16]. None of the 50 excluded studies reported a non-responder analysis, though it is known that non-responders may have different attitudes than responders. Etter 1997 concluded that low response rates may be associated with overestimating an effect and that the strength and direction of a non-response bias may depend on the mechanism of non-response [17]. Therefore, results may be confounded if the proportion of included data not available for analysis

1 *Subject: bmjopen-2013-004720.R1.: Failure to address potential bias in CCT*

2 such as data from non-responders or due to loss to follow-up is considerable. We believe that  
3 a value of 30% or more can be denoted as considerable. Lowering this threshold, for example  
4 a value of 30% or more can be denoted as considerable. Lowering this threshold, for example  
5 to 20%, would have resulted in less included studies. However, others suggested that 20% or  
6 more loss would be sufficient for a high risk of bias threatening the validity of results [18].  
7 Concerning questionnaires, we recommend taking measures that are known to improve re-  
8 sponse rates [19 20]. Edwards 2009 conducted a systematic review to identify effective strat-  
9 egies to increase the response to postal and electronic questionnaires [21]. The authors found  
10 several strategies to increase the response, for example, pre-notification, follow-up contact,  
11 shorter questionnaires, mentioning an obligation to respond, university sponsorship, non-  
12 monetary incentives, a statement that others had responded, an offer of survey results, giving  
13 a deadline. We did not use a strict algorithm to differentiate between comparable and not  
14 comparable baseline values between treatment groups. A statistically significant difference  
15 was judged as not comparable. Not significant differences were also regarded as not compa-  
16 rable if the difference was at least 10% of the lower of two values. Using this approach we  
17 tried to reduce subjective decisions. We are not aware of published strict algorithms in this  
18 matter.  
19  
20  
21  
22  
23  
24  
25  
26  
27  
28  
29  
30  
31  
32  
33  
34  
35  
36  
37

### 38 **High risk of bias inherent in nonrandomized controlled trials**

39 In the view of including only 1 RCT, the initial publication was based almost exclusively on  
40 CCT. However, the lack of randomization poses a very large challenge on the authors that are  
41 advised to deal with essential problems such as selection bias and confounding. Otherwise,  
42 the findings may not be valid and of limited usefulness and the many efforts may be in vain.  
43 We want to stress that the nonrandomized design is associated with a high risk of bias because  
44 known and unknown characteristics may be distributed unequally between groups [22].  
45 Certain study characteristics such as prospective design, concurrent control group, adjustment  
46  
47  
48  
49  
50  
51  
52  
53  
54  
55  
56  
57  
58  
59  
60

1 *Subject: bmjopen-2013-004720.R1.: Failure to address potential bias in CCT*

2  
3 of results with respect to different baseline values, and confounder control can limit additional  
4  
5 bias. For example, Ioannidis 2001 [23] reported that discrepancies between RCT and CCT  
6  
7 were less common when only CCT with a prospective design were considered. The Cochrane  
8  
9 Collaboration offers a guide for inclusion of nonrandomized studies [24] and it has developed  
10  
11 a tool for assessing the risk of bias in both RCT and CCT [25]. Guidelines for reporting ob-  
12  
13 servational studies have been published to improve their quality [5]. Cox regression analysis,  
14  
15 propensity-score-based analysis, and instrumental variable analysis are methods that have  
16  
17 been used for correction of confounding bias in non-randomized studies [26]. Different values  
18  
19 of various outcome measures between groups may be simply caused by different baseline data  
20  
21 in lieu of absent significant treatment effects. We accepted any type of method adjusting or  
22  
23 stratifying for one or more known differences in baseline characteristics. Nevertheless, it  
24  
25 should be kept in mind that methods of adjustment do not guarantee removal of bias and that  
26  
27 residual confounding may remain high [22]. Concerning the non-randomized design, we  
28  
29 strongly recommend the use of methods for adjusting the results for confounders to aim for a  
30  
31 less biased estimation of the treatment effect [27] and the adoption of guidelines for the re-  
32  
33 porting of observational studies [5].  
34  
35  
36  
37  
38

### 39 **Strengths and limitations**

40  
41  
42 The strengths of the present study are a comprehensive literature search, strict adherence to  
43  
44 the projected methodology, the identification of lack of quality in PRO studies and addressing  
45  
46 the specific problems of PRO studies. We should consider some limitations: The study is con-  
47  
48 fined to a single disease and conclusions drawn from its results may not be generalizable to  
49  
50 other diseases. The arbitrary limits set for inclusion of studies are responsible for the extent of  
51  
52 excluded studies. These limits may be questioned by other investigators. During re-evaluation  
53  
54 of study quality, we found that one study fulfilled all criteria, although, this study was exclud-  
55  
56  
57  
58  
59  
60



1 *Subject: bmjopen-2013-004720.R1.: Failure to address potential bias in CCT*

2 ed in previous reports [28]. The minimum follow-up of 70% for inclusion was set arbitrarily  
3 and others might find this threshold too low. We did not endorse the recently published re-  
4 porting of PRO in randomized trials, an extension of the CONSORT statement [4]. All in-  
5 cluded studies in the present review are nonrandomized. We think that the lack of randomiza-  
6 tion is the prevailing issue. We did not endorse the CONSORT PRO extension for another  
7 reason. The included studies were published many years before this extension was published.  
8 There might be a need to develop an extension of the STROBE statement [5] aiming to im-  
9 prove the reporting of PRO in nonrandomized studies. This extension could emphasize the  
10 specific challenges of reporting PRO with respect to lack of randomization.  
11  
12  
13  
14  
15  
16  
17  
18  
19  
20  
21  
22  
23  
24  
25  
26  
27  
28  
29  
30  
31  
32  
33  
34  
35  
36  
37  
38  
39  
40  
41  
42  
43  
44  
45  
46  
47  
48  
49  
50  
51  
52  
53  
54  
55  
56  
57  
58  
59  
60

1  
2  
3  
4  
5  
6  
7  
8  
9  
10  
11  
12  
13  
14  
15  
16  
17  
18  
19  
20  
21  
22  
23  
24  
25  
26  
27  
28  
29  
30  
31  
32  
33  
34  
35  
36  
37  
38  
39  
40  
41  
42  
43  
44  
45  
46  
47  
48  
49  
50  
51  
52  
53  
54  
55  
56  
57  
58  
59  
60

*Subject: bmjopen-2013-004720.R1.: Failure to address potential bias in CCT*

## Conclusions

We found that a considerable number of non-randomized controlled reporting patient-reported outcomes were excluded from a systematic review because of a lack of predefined reporting requirements. The assumed overall risk of bias was regarded too high to consider the data of these studies for inclusion in the systematic review. With respect to the reporting of patient-reported outcomes, active efforts are required to improve the quality of reporting in nonrandomized controlled trials and to increase the number of randomized controlled trials.

1 *Subject: bmjopen-2013-004720.R1.: Failure to address potential bias in CCT*

2  
3 **Acknowledgements:** Parts of the study have been presented at 19th Cochrane Colloquium 19  
4  
5 to 22 October 2011 in Madrid, Spain.  
6  
7

8 **Funding:** This research received no specific grant from any funding agency in the public,  
9  
10 commercial or not-for-profit sectors. The University of Cologne provided full-texts. The fun-  
11  
12 ders had no role in study design, data collection and analysis, decision to publish, or prepara-  
13  
14 tion of the manuscript.  
15  
16

17  
18 **Author contribution:** Conceived and designed the experiments: FP. Performed the experi-  
19  
20 ments: FP. Analysed the data: FP, MP. Wrote the manuscript: FP, AML, CT, MP.  
21  
22

23 **Competing interests:** None  
24  
25

26 **Data Sharing Statement:** No additional data are available  
27  
28

29  
30 **Reporting guidelines:** PRISMA checklist is attached  
31  
32  
33  
34  
35  
36  
37  
38  
39  
40  
41  
42  
43  
44  
45  
46  
47  
48  
49  
50  
51  
52  
53  
54  
55  
56  
57  
58  
59  
60

Subject: bmjopen-2013-004720.R1.: Failure to address potential bias in CCT

## References

1. Peinemann F, Grouven U, Bartel C, et al. Permanent interstitial low-dose rate brachytherapy for patients with localized prostate cancer – a systematic review of randomized and non-randomized controlled clinical trials. *Eur Urol* 2011;**60**(5):881-93
2. Patrick D, Guyatt GH, Acquadro C. Chapter 17: Patient-reported outcomes. In: Higgins JPT, Green S, eds. *Cochrane Handbook for Systematic Reviews of Interventions* Version 510 [updated March 2011]. Chichester: The Cochrane Collaboration, 2011.
3. Schulz KF, Altman DG, Moher D, et al. CONSORT 2010 statement: updated guidelines for reporting parallel group randomised trials. *PLoS Med* 2010;**7**(3):e1000251
4. Calvert M, Blazeby J, Altman DG, et al. Reporting of patient-reported outcomes in randomized trials: the CONSORT PRO extension. *JAMA* 2013;**309**(8):814-22
5. von Elm E, Altman DG, Egger M, et al. The Strengthening the Reporting of Observational Studies in Epidemiology (STROBE) statement: guidelines for reporting observational studies. *PLoS Med* 2007;**4**(10):e296
6. O'Connor D, Green S, Higgins JPT. Chapter 5: Defining the review question and developing criteria for including studies. In: Higgins JPT, Green S, eds. *Cochrane Handbook for Systematic Reviews of Interventions* Version 510 [updated March 2011]. Chichester: The Cochrane Collaboration, 2011.
7. *Methods Guide for Medical Test Reviews*. AHRQ Publication No. 12-EC017. Rockville: Agency for Healthcare Research and Quality, 2012.
8. White CM, Ip S, McPheeters M, et al. Using existing systematic reviews to replace de novo processes in conducting Comparative Effectiveness Reviews. *Methods Guide for Comparative Effectiveness Reviews*. Rockville: Agency for Healthcare Research and Quality, 2009.
9. Ebele JN, Sauter G, Epstein JI, et al. *Pathology and genetics of tumours of the urinary system and male genital organs*. Lyon: IARC Press, 2004.
10. Heidenreich A, Bolla M, Joniau S, et al. *Guidelines on prostate cancer*. Arnhem: European Association of Urology, 2011.
11. *Prostate cancer. Guideline for the management of clinically localized prostate cancer: 2007 update*. Linthicum: American Urological Association, 2007.
12. Nath R. Overview of brachytherapy physics. In: Thomadsen BR, Rivard MR, Butler W, eds. *Brachytherapy physics*. Second ed. Madison: Medical Physics Publishing, 2005.
13. Wilt TJ, MacDonald R, Rutks I, et al. Systematic review: comparative effectiveness and harms of treatments for clinically localized prostate cancer. *Ann Intern Med* 2008;**148**(6):435-48

1 *Subject: bmjopen-2013-004720.R1.: Failure to address potential bias in CCT*

- 2
- 3 14. Koukourakis G, Kelekis N, Armonis V, et al. Brachytherapy for prostate cancer: a  
4 systematic review. *Adv Urol* 2009;327945
- 5
- 6 15. Rosenthal SA, Bittner NH, Beyer DC, et al. American Society for Radiation Oncology  
7 (ASTRO) and American College of Radiology (ACR) practice guideline for the  
8 transperineal permanent brachytherapy of prostate cancer. *Int J Radiat Oncol Biol Phys*  
9 2011;**79**(2):335-41
- 10
- 11 16. Crook JM, Gomez-Iturriaga A, Wallace K, et al. Comparison of health-related quality of  
12 life 5 years after SPIRIT (Surgical Prostatectomy [RP] versus Interstitial Radiation [BT]  
13 Intervention trial ACOSOG Z0070). *Int J Radiat Oncol Biol Phys* 2010;**78**(3 Suppl  
14 1):S76
- 15
- 16
- 17 17. Etter JF, Perneger TV. Analysis of non-response bias in a mailed health survey. *J Clin*  
18 *Epidemiol* 1997;**50**(10):1123-8
- 19
- 20 18. Schulz KF, Grimes DA. Sample size slippages in randomised trials: exclusions and the  
21 lost and wayward. *Lancet* 2002;**359**(9308):781-5
- 22
- 23 19. Smeeth L, Fletcher AE. Improving the response rates to questionnaires. *BMJ*  
24 2002;**324**(7347):1168-9
- 25
- 26 20. Brealey SD, Atwell C, Bryan S, et al. Improving response rates using a monetary  
27 incentive for patient completion of questionnaires: an observational study. *BMC Med*  
28 *Res Methodol* 2007;**7**:12
- 29
- 30 21. Edwards PJ, Roberts I, Clarke MJ, et al. Methods to increase response to postal and  
31 electronic questionnaires. *Cochrane Database Syst Rev* 2009(3):MR000008
- 32
- 33 22. Deeks JJ, Dinnes J, D'Amico R, et al. Evaluating non-randomised intervention studies.  
34 *Health Technol Assess* 2003;**7**(27):iii-x, 1-173
- 35
- 36 23. Ioannidis JP, Haidich AB, Pappa M, et al. Comparison of evidence of treatment effects in  
37 randomized and nonrandomized studies. *JAMA : the journal of the American Medical*  
38 *Association* 2001;**286**(7):821-30
- 39
- 40 24. Reeves BC, Deeks JJ, Higgins JPT, et al. Chapter 13: Including non-randomized studies.  
41 In: Higgins JPT, Green S, eds. *Cochrane Handbook for Systematic Reviews of*  
42 *Interventions* Version 510 [updated March 2011]. Chichester: The Cochrane  
43 *Collaboration*, 2011.
- 44
- 45 25. Higgins JPT, Altman DG, Sterne JAC. Chapter 8 Assessing risk of bias in included  
46 studies. In: Higgins JPT, Green S, eds. *Cochrane Handbook for Systematic Reviews of*  
47 *Interventions* Version 510 [updated March 2011]. Oxford: The Cochrane Collaboration,  
48 2011.
- 49
- 50 26. Schmoor C, Gall C, Stampf S, et al. Correction of confounding bias in non-randomized  
51 studies by appropriate weighting. *Biom J* 2011;**53**(2):369-87
- 52
- 53 27. Cox E, Martin BC, Van Staa T, et al. Good research practices for comparative  
54 effectiveness research: approaches to mitigate bias and confounding in the design of  
55 nonrandomized studies of treatment effects using secondary data sources: the
- 56
- 57
- 58
- 59
- 60

1  
2  
3  
4  
5  
6  
7  
8  
9  
10  
11  
12  
13  
14  
15  
16  
17  
18  
19  
20  
21  
22  
23  
24  
25  
26  
27  
28  
29  
30  
31  
32  
33  
34  
35  
36  
37  
38  
39  
40  
41  
42  
43  
44  
45  
46  
47  
48  
49  
50  
51  
52  
53  
54  
55  
56  
57  
58  
59  
60

*Subject: bmjopen-2013-004720.R1.: Failure to address potential bias in CCT*

International Society for Pharmacoeconomics and Outcomes Research Good Research Practices for Retrospective Database Analysis Task Force Report--Part II. *Value Health* 2009;**12**(8):1053-61

28. Pinkawa M, Asadpour B, Piroth MD, et al. Health-related quality of life after permanent I-125 brachytherapy and conformal external beam radiotherapy for prostate cancer: a matched-pair comparison. *Radiother Oncol* 2009;**91**(2):225-31
29. Bacon CG, Giovannucci E, Testa M, et al. The impact of cancer treatment on quality of life outcomes for patients with localized prostate cancer. *J Urol* 2001;**166**(5):1804-10
30. Ball AJ, Gambill B, Fabrizio MD, et al. Prospective longitudinal comparative study of early health-related quality-of-life outcomes in patients undergoing surgical treatment for localized prostate cancer: a short-term evaluation of five approaches from a single institution. *J Endourol* 2006;**20**(10):723-31
31. Befort CA, Zelefsky MJ, Scardino PT, et al. A measure of health-related quality of life among patients with localized prostate cancer: Results from ongoing scale development. *Clinical Prostate Cancer* 2005;**4**(2):100-08
32. Bergman J, Gore JL, Penson DF, et al. Erectile aid use by men treated for localized prostate cancer. *J Urol* 2009;**182**(2):649-54
33. Bergman J, Kwan L, Litwin MS. Improving decisions for men with prostate cancer: translational outcomes research. *J Urol* 2010;**183**(6):2186-92
34. Brandeis JM, Litwin MS, Burnison CM, et al. Quality of life outcomes after brachytherapy for early stage prostate cancer. *J Urol* 2000;**163**(3):851-57
35. Brown MW, Brooks JP, Albert PS, et al. An analysis of erectile function after intensity modulated radiation therapy for localized prostate carcinoma. *Prostate Cancer Prostatic Dis* 2007;**10**(2):189-93
36. Burnett AL, Aus G, Canby-Hagino ED, et al. Erectile function outcome reporting after clinically localized prostate cancer treatment. *J Urol* 2007;**178**(2):597-601
37. Chaikin DC, Broderick GA, Malloy TR, et al. Erectile dysfunction following minimally invasive treatments for prostate cancer. *Urology* 1996;**48**(1):100-04
38. Chen RC, Clark JA, Talcott JA. Individualizing quality-of-life outcomes reporting: how localized prostate cancer treatments affect patients with different levels of baseline urinary, bowel, and sexual function. *J Clin Oncol* 2009;**27**(24):3916-22
39. Choo R, Long J, Gray R, et al. Prospective survey of sexual function among patients with clinically localized prostate cancer referred for definitive radiotherapy and the impact of radiotherapy on sexual function. *Support Care Cancer* 2010;**18**(6):715-22
40. Clark JA, Inui TS, Silliman RA, et al. Patients' perceptions of quality of life after treatment for early prostate cancer. *J Clin Oncol* 2003;**21**(20):3777-84

1 *Subject: bmjopen-2013-004720.R1.: Failure to address potential bias in CCT*

- 2
- 3 41. Downs TM, Sadetsky N, Pasta DJ, et al. Health related quality of life patterns in patients  
4 treated with interstitial prostate brachytherapy for localized prostate cancer--data from  
5 CaPSURE. *J Urol* 2003;**170**(5):1822-7
- 6
- 7 42. Eton DT, Lepore SJ, Helgeson VS. Early quality of life in patients with localized prostate  
8 carcinoma: an examination of treatment-related, demographic, and psychosocial factors.  
9 *Cancer* 2001;**92**(6):1451-9
- 10
- 11 43. Frank SJ, Pisters LL, Davis J, et al. An assessment of quality of life following radical  
12 prostatectomy, high dose external beam radiation therapy and brachytherapy iodine  
13 implantation as monotherapies for localized prostate cancer. *J Urol* 2007;**177**(6):2151-56
- 14
- 15 44. Fulmer BR, Bissonette EA, Petroni GR, et al. Prospective assessment of voiding and  
16 sexual function after treatment for localized prostate carcinoma: comparison of radical  
17 prostatectomy to hormonobrachytherapy with and without external beam radiotherapy.  
18 *Cancer* 2001;**91**(11):2046-55
- 19
- 20 45. Gore JL, Kwan L, Lee SP, et al. Survivorship beyond convalescence: 48-month quality-  
21 of-life outcomes after treatment for localized prostate cancer. *J Natl Cancer Inst*  
22 2009;**101**(12):888-92
- 23
- 24 46. Guedea F, Ferrer M, Pera J, et al. Quality of life two years after radical prostatectomy,  
25 prostate brachytherapy or external beam radiotherapy for clinically localised prostate  
26 cancer: the Catalan Institute of Oncology/Bellvitge Hospital experience. *Clin Transl*  
27 *Oncol* 2009;**11**(7):470-78
- 28
- 29 47. Hashine K, Kusuhara Y, Miura N, et al. A prospective longitudinal study comparing a  
30 radical retropubic prostatectomy and permanent prostate brachytherapy regarding the  
31 health-related quality of life for localized prostate cancer. *Jpn J Clin Oncol*  
32 2008;**38**(7):480-85
- 33
- 34 48. Hashine K, Kusuhara Y, Miura N, et al. Health-related quality of life using SF-8 and  
35 EPIC questionnaires after treatment with radical retropubic prostatectomy and permanent  
36 prostate brachytherapy. *Jpn J Clin Oncol* 2009;**39**(8):502-08
- 37
- 38 49. Hervouet S, Savard J, Simard S, et al. Psychological functioning associated with prostate  
39 cancer: cross-sectional comparison of patients treated with radiotherapy, brachytherapy,  
40 or surgery. *J Pain Symptom Manage* 2005;**30**(5):474-84
- 41
- 42 50. Hollenbeck BK, Dunn RL, Wei JT, et al. Neoadjuvant hormonal therapy and older age are  
43 associated with adverse sexual health-related quality-of-life outcome after prostate  
44 brachytherapy. *Urology* 2002;**59**(4):480-4
- 45
- 46 51. Jo Y, Junichi H, Tomohiro F, et al. Radical prostatectomy versus high-dose rate  
47 brachytherapy for prostate cancer: effects on health-related quality of life. *BJU Int*  
48 2005;**96**(1):43-47
- 49
- 50 52. Johnstone PA, Gray C, Powell CR. Quality of life in T1-3N0 prostate cancer patients  
51 treated with radiation therapy with minimum 10-year follow-up. *Int J Radiat Oncol Biol*  
52 *Phys* 2000;**46**(4):833-8
- 53
- 54
- 55
- 56
- 57
- 58
- 59
- 60



1  
2  
3  
4  
5  
6  
7  
8  
9  
10  
11  
12  
13  
14  
15  
16  
17  
18  
19  
20  
21  
22  
23  
24  
25  
26  
27  
28  
29  
30  
31  
32  
33  
34  
35  
36  
37  
38  
39  
40  
41  
42  
43  
44  
45  
46  
47  
48  
49  
50  
51  
52  
53  
54  
55  
56  
57  
58  
59  
60

*Subject: bmjopen-2013-004720.R1.: Failure to address potential bias in CCT*

53. Joly F, Brune D, Couette JE, et al. Health-related quality of life and sequelae in patients treated with brachytherapy and external beam irradiation for localized prostate cancer. *Ann Oncol* 1998;**9**:(7):751-57
54. Kakehi Y, Takegami M, Suzukamo Y, et al. Health related quality of life in Japanese men with localized prostate cancer treated with current multiple modalities assessed by a newly developed Japanese version of the Expanded Prostate Cancer Index Composite. *J Urol* 2007;**177**(5):1856-61
55. Lev EL, Eller LS, Gejerman G, et al. Quality of life of men treated for localized prostate cancer: outcomes at 6 and 12 months. *Support Care Cancer* 2009;**17**(5):509-17
56. Lilleby W, Fossa SD, Waehre HR, et al. Long-term morbidity and quality of life in patients with localized prostate cancer undergoing definitive radiotherapy or radical prostatectomy. *Int J Radiat Oncol Biol Phys* 1999;**43**(4):735-43
57. Litwin MS, Sadetsky N, Pasta DJ, et al. Bowel function and bother after treatment for early stage prostate cancer: a longitudinal quality of life analysis from CaPSURE. *J Urol* 2004;**172**(2):515-9
58. Litwin MS, Gore JL, Kwan L, et al. Quality of life after surgery, external beam irradiation, or brachytherapy for early-stage prostate cancer. *Cancer* 2007;**109**(11):2239-47
59. Mehta SS, Lubeck DP, Pasta DJ, et al. Fear of cancer recurrence in patients undergoing definitive treatment for prostate cancer: results from CaPSURE. *J Urol* 2003;**170**:(5):1931-33
60. Miller DC, Sanda MG, Dunn RL, et al. Long-term outcomes among localized prostate cancer survivors: health-related quality-of-life changes after radical prostatectomy, external radiation, and brachytherapy. *J Clin Oncol* 2005;**23**(12):2772-80
61. Miller DC, Wei JT, Dunn RL, et al. Use of medications or devices for erectile dysfunction among long-term prostate cancer treatment survivors: potential influence of sexual motivation and/or indifference. *Urology* 2006;**68**(1):166-71
62. Monahan PO, Champion V, Rawl S, et al. What contributes more strongly to predicting QOL during 1-year recovery from treatment for clinically localized prostate cancer: 4-weeks-post-treatment depressive symptoms or type of treatment? *Qual Life Res* 2007;**16**(3):399-411
63. Namiki S, Satoh T, Baba S, et al. Quality of life after brachytherapy or radical prostatectomy for localized prostate cancer: a prospective longitudinal study. *Urology* 2006;**68**(6):1230-36
64. Namiki S, Kwan L, Kagawa-Singer M, et al. Distress and social dysfunction following prostate cancer treatment: a longitudinal cross-cultural comparison of Japanese and American men. *Prostate Cancer Prostatic Dis* 2009;**12**(1):67-71
65. Ohashi T, Yorozu A, Toya K, et al. Serial changes of international prostate symptom score following I-125 prostate brachytherapy. *Int J Clin Oncol* 2006;**11**(4):320-25



1 *Subject: bmjopen-2013-004720.R1.: Failure to address potential bias in CCT*

- 2  
3 66. Pinkawa M, Fishedick K, Gagel B, et al. Association of neoadjuvant hormonal therapy  
4 with adverse health-related quality of life after permanent iodine-125 brachytherapy for  
5 localized prostate cancer. *Urology* 2006;**68**(1):104-09  
6  
7 67. Roach M, 3rd, Chinn DM, Holland J, et al. A pilot survey of sexual function and quality  
8 of life following 3D conformal radiotherapy for clinically localized prostate cancer. *Int J*  
9 *Radiat Oncol Biol Phys* 1996;**35**(5):869-74  
10  
11 68. Sanda MG, Dunn RL, Michalski J, et al. Quality of life and satisfaction with outcome  
12 among prostate-cancer survivors. *N Engl J Med* 2008;**358**(12):1250-61  
13  
14 69. Schover LR, Fouladi RT, Warneke CL, et al. Defining sexual outcomes after treatment for  
15 localized prostate carcinoma. *Cancer* 2002;**95**(8):1773-85  
16  
17 70. Soderdahl DW, Davis JW, Schellhammer PF, et al. Prospective longitudinal comparative  
18 study of health-related quality of life in patients undergoing invasive treatments for  
19 localized prostate cancer. *J Endourol* 2005;**19**(3):318-26  
20  
21 71. Speight JL, Elkin EP, Pasta DJ, et al. Longitudinal assessment of changes in sexual  
22 function and bother in patients treated with external beam radiotherapy or brachytherapy,  
23 with and without neoadjuvant androgen ablation: data from CaPSURE. *Int J Radiat*  
24 *Oncol Biol Phys* 2004;**60**(4):1066-75  
25  
26 72. Stone NN, Marshall DT, Stone JJ, et al. Does neoadjuvant hormonal therapy improve  
27 urinary function when given to men with large prostates undergoing prostate  
28 brachytherapy? *J Urol* 2010;**183**(2):634-39  
29  
30 73. Trojan L, Harrer K, Schafer J, et al. [Complications and side effects of low dose rate  
31 brachytherapy for the treatment of prostate cancer: data on a 13 year follow-up study  
32 from Mannheim]. *Urologe A* 2007;**46**(11):1542-47  
33  
34 74. Tward JD, Lee CM, Pappas LM, et al. Survival of men with clinically localized prostate  
35 cancer treated with prostatectomy, brachytherapy, or no definitive treatment: impact of  
36 age at diagnosis. *Cancer* 2006;**107**(10):2392-400  
37  
38 75. Valicenti RK, Bissondtte EA, Chen C, et al. Longitudinal comparison of sexual function  
39 after 3-dimensional conformal radiation therapy or prostate brachytherapy. *J Urol*  
40 2002;**168**(6):2499-504  
41  
42 76. Van de Poll-Franse LV, Sadetsky N, Kwan L, et al. Severity of cardiovascular disease and  
43 health-related quality of life in men with prostate cancer: a longitudinal analysis from  
44 CaPSURE. *Qual Life Res* 2008;**17**(6):845-55  
45  
46 77. Wyler SF, Engeler DS, Seelentag W, et al. Health-related quality of life after radical  
47 prostatectomy and low-dose-rate brachytherapy for localized prostate cancer. *Urol Int*  
48 2009;**82**(1):17-23  
49  
50 78. Zagar TM, Stock RG, Cesaretti JA, et al. Assessment of postbrachytherapy sexual  
51 function: a comparison of the IIEF-5 and the MSEFS. *Brachytherapy* 2007;**6**(1):26-33  
52  
53  
54  
55  
56  
57  
58  
59  
60

1 *Subject: bmjopen-2013-004720.R1.: Failure to address potential bias in CCT*

2  
3 Figure legends

4  
5 Figure 1. Study flow

6 Abbreviation. PICO: population, intervention, comparator, outcome; PRO: patient-reported  
7 outcomes; RCT: randomised controlled trial  
8  
9  
10  
11  
12  
13  
14  
15  
16  
17  
18  
19  
20  
21  
22  
23  
24  
25  
26  
27  
28  
29  
30  
31  
32  
33  
34  
35  
36  
37  
38  
39  
40  
41  
42  
43  
44  
45  
46  
47  
48  
49  
50  
51  
52  
53  
54  
55  
56  
57  
58  
59  
60

For peer review only

1  
2  
3  
4  
5  
6  
7  
8  
9  
10  
11  
12  
13  
14  
15  
16  
17  
18  
19  
20  
21  
22  
23  
24  
25  
26  
27  
28  
29  
30  
31  
32  
33  
34  
35  
36  
37  
38  
39  
40  
41  
42  
43  
44  
45  
46  
47  
48  
49

Subject: *bmjopen-2013-004720.R1.: Failure to address potential bias in CCT*

Table 1. Reasons for excluding PRO articles

| Nonrandomized studies | Inclusion criteria |     |     |     | Requirements to contain high risk of bias |                     |                                  |                                       | Comments                     |
|-----------------------|--------------------|-----|-----|-----|-------------------------------------------|---------------------|----------------------------------|---------------------------------------|------------------------------|
|                       | P                  | I   | C   | O   | Response ≥70%                             | Baseline each group | Baseline comparable/ or adjusted | Statistical comparison between groups |                              |
| Bacon 2001 [29]       | yes                | yes | NO  | -   | -                                         | -                   | -                                | -                                     | No concurrent group          |
| Ball 2006 [30]        | yes                | yes | NO  | -   | -                                         | -                   | -                                | -                                     | Cryotherapy                  |
| Befort 2005 [31]      | yes                | yes | yes | yes | NO                                        | -                   | -                                | -                                     | Low response                 |
| Bergman 2009 [32]     | yes                | yes | yes | yes | yes                                       | yes                 | yes                              | NO                                    | No appropriate test          |
| Bergman 2010 [33]     | yes                | yes | yes | yes | NO                                        | -                   | -                                | -                                     | Low response                 |
| Brandeis 2000 [34]    | yes                | NO  | -   | -   | -                                         | -                   | -                                | -                                     | 29% LDR-BT + EBRT            |
| Brown 2007 [35]       | yes                | NO  | -   | -   | -                                         | -                   | -                                | -                                     | EBRT                         |
| Burnett 2007 [36]     | yes                | yes | yes | yes | NO                                        | -                   | -                                | -                                     | Response not reported        |
| Chaikin 1996 [37]     | NO                 | -   | -   | -   | -                                         | -                   | -                                | -                                     | Staging not reported         |
| Chen 2009 [38]        | yes                | yes | yes | yes | yes                                       | yes                 | NO                               | -                                     | No confounder control        |
| Choo 2010 [39]        | yes                | yes | yes | yes | yes                                       | NO                  | -                                | -                                     | Baseline not reported        |
| Clark 2003 [40]       | yes                | yes | yes | yes | NO                                        | -                   | -                                | -                                     | Low response                 |
| Downs 2003 [41]       | yes                | yes | yes | yes | yes                                       | yes                 | NO                               | -                                     | No confounder control        |
| Eton 2001 [42]        | yes                | yes | yes | yes | NO                                        | -                   | -                                | -                                     | Low response                 |
| Frank 2007 [43]       | yes                | yes | yes | yes | NO                                        | -                   | -                                | -                                     | Low response                 |
| Fulmer 2001 [44]      | yes                | yes | yes | yes | NO                                        | -                   | -                                | -                                     | Response not reported        |
| Gore 2009 [45]        | yes                | yes | yes | yes | NO                                        | -                   | -                                | -                                     | Low response                 |
| Guedea 2009 [46]      | yes                | yes | yes | yes | yes                                       | yes                 | NO                               | -                                     | No confounder control        |
| Hashine 2008 [47]     | yes                | yes | yes | yes | yes                                       | yes                 | NO                               | -                                     | No confounder control        |
| Hashine 2009 [48]     | yes                | yes | yes | yes | yes                                       | yes                 | NO                               | -                                     | No confounder control        |
| Hervouet 2005 [49]    | NO                 | -   | -   | -   | -                                         | -                   | -                                | -                                     | ≥20% T3-T4 in control groups |
| Hollenbeck 2002 [50]  | yes                | NO  | -   | -   | -                                         | -                   | -                                | -                                     | LDR-BT + EBRT                |
| Jo 2005 [51]          | yes                | NO  | -   | -   | -                                         | -                   | -                                | -                                     | High-dose rate brachytherapy |
| Johnstone 2000 [52]   | yes                | NO  | -   | -   | -                                         | -                   | -                                | -                                     | EBRT                         |
| Joly 1998 [53]        | yes                | NO  | -   | -   | -                                         | -                   | -                                | -                                     | LDR-BT + EBRT                |
| Kakehi 2007 [54]      | yes                | yes | yes | yes | yes                                       | NO                  | -                                | -                                     | Baseline not reported        |
| Lev 2009 [55]         | yes                | NO  | -   | -   | -                                         | -                   | -                                | -                                     | LDR-BT + EBRT                |
| Lilleby 1999 [56]     | yes                | NO  | -   | -   | -                                         | -                   | -                                | -                                     | EBRT                         |
| Litwin 2004 [57]      | yes                | yes | yes | yes | NO                                        | -                   | -                                | -                                     | Low response                 |
| Litwin 2007 [58]      | yes                | NO  | -   | -   | -                                         | -                   | -                                | -                                     | 25% LDR-BT + EBRT            |
| Mehta 2003 [59]       | yes                | yes | yes | NO  | -                                         | -                   | -                                | -                                     | "Fear of cancer"             |

Subject: *bmjopen-2013-004720.R1.: Failure to address potential bias in CCT*

| Nonrandomized studies   | Inclusion criteria |     |     |     | Requirements to contain high risk of bias |                     |                                  |                                       | Comments                       |
|-------------------------|--------------------|-----|-----|-----|-------------------------------------------|---------------------|----------------------------------|---------------------------------------|--------------------------------|
|                         | P                  | I   | C   | O   | Response ≥70%                             | Baseline each group | Baseline comparable/ or adjusted | Statistical comparison between groups |                                |
| Miller 2005 [60]        | yes                | NO  | -   | -   | -                                         | -                   | -                                | -                                     | 44% LDR-BT + EBRT              |
| Miller 2006 [61]        | yes                | yes | yes | yes | yes                                       | NO                  | -                                | -                                     | Baseline not reported          |
| Monahan 2007 [62]       | yes                | yes | yes | yes | NO                                        | -                   | -                                | -                                     | Low response                   |
| Namiki 2006 [63]        | yes                | yes | yes | yes | NO                                        | -                   | -                                | -                                     | Low response                   |
| Namiki 2009 [64]        | yes                | yes | yes | yes | NO                                        | -                   | -                                | -                                     | Low response                   |
| Ohashi 2006 [65]        | yes                | yes | yes | yes | NO                                        | -                   | -                                | -                                     | Low response                   |
| Pinkawa 2006 [66]       | yes                | yes | NO  | -   | -                                         | -                   | -                                | -                                     | LDR-BT + hormones <sup>†</sup> |
| Roach 1996 [67]         | yes                | NO  | -   | -   | -                                         | -                   | -                                | -                                     | EBRT, single-arm trial         |
| Sanda 2008 [68]         | yes                | yes | yes | yes | NO                                        | -                   | -                                | -                                     | Low response                   |
| Schover 2002 [69]       | yes                | yes | yes | yes | NO                                        | -                   | -                                | -                                     | Low response                   |
| Soderdahl 2005 [70]     | yes                | yes | yes | yes | NO                                        | -                   | -                                | -                                     | Low response                   |
| Speight 2004 [71]       | yes                | yes | yes | yes | NO                                        | -                   | -                                | -                                     | Response not reported          |
| Stone 2010 [72]         | yes                | yes | NO  | -   | -                                         | -                   | -                                | -                                     | LDR-BT + hormones <sup>†</sup> |
| Trojan 2007 [73]        | yes                | yes | yes | yes | NO                                        | -                   | -                                | -                                     | Low response                   |
| Tward 2006 [74]         | yes                | yes | yes | NO  | -                                         | -                   | -                                | -                                     | Mortality differs <sup>§</sup> |
| Valicenti 2002 [75]     | yes                | yes | yes | yes | NO                                        | -                   | -                                | -                                     | Response not reported          |
| Van de Poll-F 2008 [76] | yes                | NO  | -   | -   | -                                         | -                   | -                                | -                                     | LDR-BT + EBRT                  |
| Wyler 2009 [77]         | yes                | yes | yes | yes | yes                                       | yes                 | NO                               | -                                     | No confounder control          |
| Zagar 2007 [78]         | yes                | NO  | -   | -   | -                                         | -                   | -                                | -                                     | LDR-BT + EBRT                  |
| "NO" counts             | 2                  | 13  | 4   | 2   | 19                                        | 3                   | 6                                | 1                                     | Total: 50 studies              |
| PICO not met: 21        |                    |     |     |     | High risk of bias: 29                     |                     |                                  |                                       |                                |

-: not appropriate

\*Mehta 2003: no appropriate endpoint

<sup>†</sup>Pinkawa 2006; Stone 2010: neoadjuvant hormonal therapy

<sup>§</sup>Tward 2006: non-disease-related mortality differs greatly

Abbreviations: C: comparison of interest is radical prostatectomy, external beam radiotherapy, or no primary therapy; EBRT: external beam radiotherapy; I: intervention of interest is low-dose rate brachytherapy as monotherapy; LDR-BT: permanent interstitial low-dose rate brachytherapy; O: outcome of interest is function, bother, or generic health-related quality of life; P: patients with localized prostate cancer; PRO: patient-reported outcomes

1 *Subject: bmjopen-2013-004720.R1.: Failure to address potential bias in CCT*

2  
3  
4 Failure to address potential bias in nonrandomized controlled clinical trials may cause lack of  
5  
6 evidence on patient-reported outcomes – a method study  
7

8  
9 Frank Peinemann,<sup>1,\*</sup> Alexander Michael Labeit,<sup>2</sup> Christian Thielscher,<sup>3</sup> Michael Pinkawa,<sup>4</sup>

10  
11 <sup>1</sup>Children's Hospital, University of Cologne, Kerpener Str. 62, 50937 Cologne, Germany

12 <sup>2</sup>Outcomes Research Center, University of Illinois, One Illini Drive, Peoria, IL 61656, USA

13 <sup>3</sup>FOM University of Applied Science for Economics & Management, Leimkugelstr. 6, 45141  
14  
15 Essen, Germany

16  
17 <sup>4</sup>Department of Radiotherapy, University Hospital, Pauwelsstr. 30, 52074 Aachen, Germany

18  
19  
20  
21 FP: [pubmedprjournal@gmail.com](mailto:pubmedprjournal@gmail.com)

22  
23 AML: [alabeit.publications@gmail.com](mailto:alabeit.publications@gmail.com)

24  
25 CT: [christian.thielscher@fom.de](mailto:christian.thielscher@fom.de)

26  
27 MP: [mpinkawa@ukaachen.de](mailto:mpinkawa@ukaachen.de)

28  
29  
30  
31  
32  
33 \*Corresponding author: Frank Peinemann, M.D., M.Sc., Children's Hospital, University of  
34 Cologne, Kerpener Str. 62, 50937 Cologne, Germany; e-mail: [pubmedprjournal@gmail.com](mailto:pubmedprjournal@gmail.com).  
35  
36 Phone: +49-176-31130745.  
37

38  
39  
40 Word count, excluding title page, abstract, references, figures and tables: 6102  
41  
42  
43  
44  
45  
46  
47  
48  
49  
50  
51  
52  
53  
54  
55  
56  
57  
58  
59  
60

1  
2  
3  
4  
5  
6  
7  
8  
9  
10  
11  
12  
13  
14  
15  
16  
17  
18  
19  
20  
21  
22  
23  
24  
25  
26  
27  
28  
29  
30  
31  
32  
33  
34  
35  
36  
37  
38  
39  
40  
41  
42  
43  
44  
45  
46  
47  
48  
49  
50  
51  
52  
53  
54  
55  
56  
57  
58  
59  
60

*Subject: bmjopen-2013-004720.R1.: Failure to address potential bias in CCT*

## Abstract

Objectives: We conducted a workup of a previously published systematic review and aimed to analyse why most of the identified nonrandomized controlled clinical trials with patient-reported outcomes did not match a set of basic quality criteria.

Setting: There were no limits on the level of care and the geographical location.

Participants: The review evaluated permanent interstitial low-dose rate brachytherapy in patients with localized prostate cancer and compared that intervention to alternative procedures such as external beam radiotherapy, radical prostatectomy, and no primary therapy.

Primary outcome measure: Fulfilment of basic inclusion criteria according to a PICO framework and accomplishment of requirements to contain superimposed risk of bias.

Results: We found that 21 of 50 excluded nonrandomized controlled trials did not meet PICO inclusion criteria. The rest of 29 of 50 studies lacked quality of reporting. The resulting flaws included attrition bias due to loss of follow-up, lack of reporting baseline data, potential confounding due to unadjusted data and lack of statistical comparison between groups.

Conclusions: With respect to the reporting of patient-reported outcomes, active efforts are required to improve the quality of reporting in nonrandomized controlled trials concerning permanent interstitial low-dose rate brachytherapy in patients with localized prostate cancer.

1 *Subject: bmjopen-2013-004720.R1.: Failure to address potential bias in CCT*

2

3

4

5

6

7

8

9

10

11

12

13

14

15

16

17

18

19

20

21

22

23

24

25

26

27

28

29

30

31

32

33

34

35

36

37

38

39

40

41

42

43

44

45

46

47

48

49

50

51

52

53

54

55

56

57

58

59

60

Key words: systematic review, patient-reported outcome, risk of bias

### Strengths and limitations of this study

- We conducted a comprehensive literature search and strictly adhered to the projected methodology.
- We identified a lack of quality in nonrandomized controlled clinical trials reporting patient-reported outcomes, analysed the cause, and suggested possible improvements in designing studies in the future.
- The analysis is confined to a single disease and a specific treatment and conclusions drawn from its results may not be generalizable to other diseases and treatments.
- The limits for the inclusion of studies are arbitrarily set.

1  
2  
3  
4  
5  
6  
7  
8  
9  
10  
11  
12  
13  
14  
15  
16  
17  
18  
19  
20  
21  
22  
23  
24  
25  
26  
27  
28  
29  
30  
31  
32  
33  
34  
35  
36  
37  
38  
39  
40  
41  
42  
43  
44  
45  
46  
47  
48  
49  
50  
51  
52  
53  
54  
55  
56  
57  
58  
59  
60

*Subject: bmjopen-2013-004720.R1.: Failure to address potential bias in CCT*

| <b>Abbreviation</b> | <b>Term</b>                                                                        |
|---------------------|------------------------------------------------------------------------------------|
| CCT                 | Nonrandomized controlled clinical trial                                            |
| CONSORT             | Consolidated standards of reporting trials                                         |
| EBRT                | External beam radiotherapy                                                         |
| EMBASE              | Excerpta medica database                                                           |
| LDR-BT              | Permanent interstitial low-dose rate brachytherapy                                 |
| MEDLINE             | Medical literature analysis and retrieval system online                            |
| PICO<br>(TS-SD)     | Participants, intervention, comparator, outcome<br>(timing, setting, study design) |
| PRO                 | Patient-reported outcome                                                           |
| RCT                 | Randomized controlled trial                                                        |
| STROBE              | Strengthening the reporting of observational studies in epidemiology               |
| TNM                 | Tumor-Node-Metastasis                                                              |



1 *Subject: bmjopen-2013-004720.R1.: Failure to address potential bias in CCT*

## 2 3 **Introduction**

4  
5  
6  
7 The present paper reports a workup of a previously published systematic review [1]. It may be  
8  
9 regarded as a methodological supplement adding information on a subset of excluded studies.  
10  
11 We have compared permanent interstitial low-dose rate brachytherapy, with radical  
12  
13 prostatectomy, external beam radiotherapy, and 'no primary therapy' in patients with localized  
14  
15 prostate cancer categorized T1 to T2. We used the term 'no primary therapy' to accommodate  
16  
17 different types of observation including active surveillance, watchful waiting, and observing  
18  
19 without a distinctive management. As a result, we included one randomized controlled trial  
20  
21 (RCT) and 30 nonrandomized controlled clinical trials (CCT). The primary outcome was  
22  
23 overall survival. The secondary outcomes were clinically defined disease-free survival,  
24  
25 biochemical recurrence-free survival, physician-reported severe adverse events, and patient-  
26  
27 reported outcomes such as function and bother scores as well as generic and disease-related  
28  
29 health-related quality of life. We concluded that the current evidence is insufficient to allow a  
30  
31 definitive conclusion about overall survival. Radical prostatectomy and external beam  
32  
33 radiotherapy can severely affect the structural integrity of neighboring organs and their  
34  
35 functions and can cause considerable long-term impairment of health-related quality of life. In  
36  
37 a view of expecting similar survival but a tremendous difference of adverse events between  
38  
39 treatment alternatives, valid data on health-related quality of life could tip the balance. At  
40  
41 least, we assume that shared-decision making and consideration of patients' preferences in  
42  
43 searching for the best individual treatment would rely on information on health-related quality  
44  
45 of life data. Of the 30 included nonrandomized studies, 13 studies reported patient-reported  
46  
47 outcomes (PROs), that is, only the patients provided the information [2]. During the study  
48  
49 selection process, we experienced that we excluded another 50 nonrandomized PRO studies.  
50  
51 We found it a pity that we could not use the many data. We had the impression that a  
52  
53 considerable number of studies were excluded because of lack in reporting quality. Therefore,  
54  
55  
56  
57  
58  
59  
60

1 *Subject: bmjopen-2013-004720.R1.: Failure to address potential bias in CCT*

2  
3 we wanted to summarize the reasons for excluding those PRO studies and make aware that  
4  
5 authors of PRO studies should meet some basic requirements for reporting of comparative  
6  
7 PRO data to achieve higher acceptance in the scientific community. The importance of  
8  
9 reporting PRO has been addressed by the Consolidated Standards of Reporting Trials  
10  
11 (CONSORT) group [3] that recently has published a PRO extension to their acclaimed  
12  
13 previous statement [4]. It may be wise to build a PRO extension to the STrengthening the  
14  
15 Reporting of OBServational studies in Epidemiology (STROBE) statement [5] that addresses  
16  
17 specific issues of observational studies.  
18  
19

20  
21 The first aim of this study was to assess whether the excluded studies met the basic inclusion  
22  
23 criteria using the PICO framework. The second aim of this study was whether the excluded  
24  
25 studies met requirements to contain high risk of bias.  
26  
27  
28  
29  
30  
31  
32  
33  
34  
35  
36  
37  
38  
39  
40  
41  
42  
43  
44  
45  
46  
47  
48  
49  
50  
51  
52  
53  
54  
55  
56  
57  
58  
59  
60

1 *Subject: bmjopen-2013-004720.R1.: Failure to address potential bias in CCT*

## 2 3 **Materials and Methods**

### 4 5 6 **Study inclusion criteria**

7  
8  
9  
10 We defined the inclusion criteria according to the PICO framework that should include four  
11 essential constituents, that is, the type of participants (P), intervention (I), comparator (C), and  
12 outcome (O) [6]. The four PICO items can be supplemented by timing (T) and setting (S), two  
13 other important features of a systematic review, to create the so-called PICOTS typology [7].  
14  
15 A further extension embraces the study design (SD) to complete all major items of a search  
16 strategy (PICOTS-SD) [8].  
17  
18  
19  
20  
21  
22

### 23 24 *Population*

25  
26  
27 Initial and present publication: Localized prostate cancer is defined by the categories T1 to T2  
28 of the Tumor-Node-Metastasis (TNM) staging system [9] if combined with an absence of  
29 both regional lymph node metastasis and distant metastasis.  
30  
31  
32

### 33 34 35 *Intervention*

36  
37  
38 Initial and present publication: Brachytherapy [10] is short-distance radiotherapy placing  
39 radiation sources with different duration and rates of dose delivery in or near tumors [11].  
40  
41 Permanent interstitial low-dose rate brachytherapy means implanting of low-energy  
42 radioactive sources emitting radiation, which are contained in titanium pellets of the size of  
43 rice grains called seeds [12].  
44  
45  
46  
47  
48

### 49 50 51 *Comparator*

52  
53  
54 Initial and present publication: The European Association of Urology suggested 3 different  
55 treatment concepts for localized prostate cancer in addition to permanent interstitial low-dose  
56 rate brachytherapy [10]: Radical prostatectomy, external beam radiotherapy, and different  
57  
58  
59  
60

1 *Subject: bmjopen-2013-004720.R1.: Failure to address potential bias in CCT*

2 types of observation including active surveillance, watchful waiting, and observing without a  
3  
4 distinctive management.  
5  
6

7  
8 *Outcome*  
9

10  
11 Initial publication: Overall survival, cancer-specific survival, disease-free survival,  
12 biochemical recurrence-free survival, severe adverse events, and patient-reported outcomes.  
13  
14 Patient-reported outcomes comprised function and bother scores as well as generic and  
15  
16 disease-related health-related quality of life.  
17  
18

19  
20  
21 Present publication: Fulfilment of basic inclusion criteria according to a PICO framework by  
22  
23 the excluded CCT. Accomplishment of requirements to contain superimposed risk of bias in  
24  
25 addition to the high risk of bias caused by the lack of randomization framework by the  
26  
27 excluded CCT.  
28  
29

30  
31 *Timing*  
32

33  
34 Initial and present publication: We did not set limits on the length of the observation period.  
35  
36

37  
38 *Setting*  
39

40  
41 Initial and present publication: We did not set limits on the setting such as type of country,  
42  
43 year of recruitment, or level of health care.  
44  
45

46  
47 *Study design*  
48

49  
50 Initial publication: We included RCT and CCT evaluating permanent interstitial low-dose rate  
51  
52 brachytherapy as monotherapy in patients with localized prostate cancer. The proportion of  
53  
54 relevant patients was required to be at least 80% of the study population and the response rate  
55  
56 of questionnaires was expected to be at least 70%. For CCT to be included, comparable base-  
57  
58  
59  
60

1 *Subject: bmjopen-2013-004720.R1.: Failure to address potential bias in CCT*

2  
3 line characteristics between treatment groups or adjustment for imbalances of these data were  
4  
5 required. Limits on year of publication or language were not applied.  
6  
7

8 Present publication: We included specifically the CCT that were excluded in the initial  
9  
10 publication.  
11

### 12 13 **Search strategy**

14  
15  
16 The search strategy was reported previously [1].  
17  
18  
19

### 20 **Study selection**

21  
22 In the present study, we selected only those 50 nonrandomized studies on PRO that were ex-  
23  
24 cluded from the evaluation in the initial publication. In the study selection process, two re-  
25  
26 viewers independently judged whether a study was included or excluded. Differences were  
27  
28 resolved by discussion without the need for a third opinion.  
29  
30  
31

### 32 **Data collection and analysis**

33  
34 The reasons for exclusion were extracted independently by two reviewers. We sought for the  
35  
36 following data: the inclusion criteria using the PICO framework, the proportion of response of  
37  
38 participants to questionnaires, which was required to be at least 70%, the reporting of separate  
39  
40 baseline characteristics for each treatment group, the reporting of comparable baseline charac-  
41  
42 teristics or adjustment for imbalances of these data such as the use of a Cox proportional haz-  
43  
44 ard model, and the reporting of statistics comparing treatment groups. Sufficient comparabil-  
45  
46 ity was defined as a difference between baseline values that were not statistically significant.  
47  
48 If a statistical test was not reported, we assumed two comparable values if the greater of the  
49  
50 two values was less than 10% above the smaller one. We also required that authors reported  
51  
52 effect measures and statistics testing the difference between treatment groups, for example, p-  
53  
54  
55  
56  
57  
58  
59  
60

1 *Subject: bmjopen-2013-004720.R1.: Failure to address potential bias in CCT*

2 values or effect measures including 95% confidence intervals. Reporting of within group  
3 comparisons or before-and-after analyses was not deemed sufficient for inclusion. We did not  
4 apply a principal summary measure as we aimed at synthesize the information in a qualitative  
5 way.  
6  
7  
8  
9  
10

### 11 **Assessment of risk of bias and quality of reporting**

12  
13 Two reviewers independently assessed the quality of reporting of CCT according to the crite-  
14 ria specified in the previous paragraph. We did not specifically assess the risk of bias because  
15 we decided to exclude all papers with regard to a lack of reporting essential data.  
16  
17  
18  
19  
20  
21  
22  
23  
24  
25  
26  
27  
28  
29  
30  
31  
32  
33  
34  
35  
36  
37  
38  
39  
40  
41  
42  
43  
44  
45  
46  
47  
48  
49  
50  
51  
52  
53  
54  
55  
56  
57  
58  
59  
60

Subject: *bmjopen-2013-004720.R1.: Failure to address potential bias in CCT*

## Results

Of a total of 462 full-text articles assessed for eligibility in the previously published systematic review, 31 studies were included and 431 studies were excluded. Among the 431 excluded articles, we identified 50 nonrandomised studies that were reporting on PRO (Figure 1). We evaluated the reasons for exclusion of those 50 studies and documented the results in Table 1.

~~We documented the reasons for exclusion of all 50 nonrandomized studies that were identified as studies reporting on PRO (Table 1).~~ In 42% (21 of 50) studies, simply the essential PICO framework was not met. In the majority of 58% (29 of 50) studies, the predefined requirement to apply measures to contain high risk of bias was not met. Of these 29 studies, 19 studies reported a proportion of patients responding to questionnaires of less than 70% or did not address this item. Baseline characteristics were not presented for treatment groups in 3 studies. In another 6 studies, baseline characteristics were not comparable between treatment groups or there was no confounder control in the analysis adjusting for important different factors such as mean age. The statistical comparison between treatment groups was deemed not appropriate in 1 study.

1 *Subject: bmjopen-2013-004720.R1.: Failure to address potential bias in CCT*

## 2 3 **Discussion**

### 4 5 6 **Main results**

7  
8  
9  
10 In summary, we found that roughly 4 of 10 excluded PRO studies did not meet the essential  
11 inclusion criteria using the PICO framework. This result is consistent with the problem of  
12 information retrieval aiming at a high recall and ending up with a low precision. The papers  
13 were obviously not relevant to the research question and we did not further examine the re-  
14 porting quality. We also found that roughly 6 of 10 excluded PRO studies met the PICO  
15 framework but did not provide predefined requirements to care sufficiently enough for a low  
16 response of patients to questionnaires, for reporting baseline characteristics between treatment  
17 groups, for adjusting differences in those baseline characteristics between treatment groups,  
18 and to use appropriate statistics to compare the outcome between treatment groups.  
19  
20  
21  
22  
23  
24  
25  
26  
27  
28  
29  
30

### 31 **Quality of reporting of patient-reported outcomes**

32  
33  
34 We identified a lack of quality of reporting in many excluded CCT and we want to stress the  
35 importance of considering a series of requirements while conducting a study on PRO. Other  
36 authors have reported recently that, concerning disease-specific mortality or disease-free sur-  
37 vival, available studies did not show significant differences between treatment groups. [13  
38 14]. In view of unknown or small differences in survival measures, the results of patient-  
39 reported outcomes studies could have a noticeable impact on medical decision making [15  
40 16]. None of the 50 excluded studies reported a non-responder analysis, though it is known  
41 that non-responders may have different attitudes than responders. Etter 1997 concluded that  
42 low response rates may be associated with overestimating an effect and that the strength and  
43 direction of a non-response bias may depend on the mechanism of non-response [17]. There-  
44 fore, results may be confounded if the proportion of included data not available for analysis  
45  
46  
47  
48  
49  
50  
51  
52  
53  
54  
55  
56  
57  
58  
59  
60



1 *Subject: bmjopen-2013-004720.R1.: Failure to address potential bias in CCT*

2 such as data from non-responders or due to loss to follow-up is considerable. We believe that  
3 a value of 30% or more can be denoted as considerable. Lowering this threshold, for example  
4 a value of 30% or more can be denoted as considerable. Lowering this threshold, for example  
5 to 20%, would have resulted in less included studies. However, others suggested that 20% or  
6 more loss would be sufficient for a high risk of bias threatening the validity of results [18].  
7 Concerning questionnaires, we recommend taking measures that are known to improve re-  
8 sponse rates [19 20]. Edwards 2009 conducted a systematic review to identify effective strat-  
9 egies to increase the response to postal and electronic questionnaires [21]. The authors found  
10 several strategies to increase the response, for example, pre-notification, follow-up contact,  
11 shorter questionnaires, mentioning an obligation to respond, university sponsorship, non-  
12 monetary incentives, a statement that others had responded, an offer of survey results, giving  
13 a deadline. We did not use a strict algorithm to differentiate between comparable and not  
14 comparable baseline values between treatment groups. A statistically significant difference  
15 was judged as not comparable. Not significant differences were also regarded as not compa-  
16 rable if the difference was at least 10% of the lower of two values. Using this approach we  
17 tried to reduce subjective decisions. We are not aware of published strict algorithms in this  
18 matter.  
19  
20  
21  
22  
23  
24  
25  
26  
27  
28  
29  
30  
31  
32  
33  
34  
35  
36  
37

### 38 **High risk of bias inherent in nonrandomized controlled trials**

39  
40  
41  
42 In the view of including only 1 RCT, the initial publication was based almost exclusively on  
43 CCT. However, the lack of randomization poses a very large challenge on the authors that are  
44 advised to deal with essential problems such as selection bias and confounding. Otherwise,  
45 the findings may not be valid and of limited usefulness and the many efforts may be in vain.  
46 We want to stress that the nonrandomized design is associated with a high risk of bias because  
47 known and unknown characteristics may be distributed unequally between groups [22].  
48  
49  
50  
51  
52  
53  
54  
55  
56  
57  
58  
59  
60  
61  
62  
63  
64  
65  
66  
67  
68  
69  
70  
71  
72  
73  
74  
75  
76  
77  
78  
79  
80  
81  
82  
83  
84  
85  
86  
87  
88  
89  
90  
91  
92  
93  
94  
95  
96  
97  
98  
99  
100  
101  
102  
103  
104  
105  
106  
107  
108  
109  
110  
111  
112  
113  
114  
115  
116  
117  
118  
119  
120  
121  
122  
123  
124  
125  
126  
127  
128  
129  
130  
131  
132  
133  
134  
135  
136  
137  
138  
139  
140  
141  
142  
143  
144  
145  
146  
147  
148  
149  
150  
151  
152  
153  
154  
155  
156  
157  
158  
159  
160  
161  
162  
163  
164  
165  
166  
167  
168  
169  
170  
171  
172  
173  
174  
175  
176  
177  
178  
179  
180  
181  
182  
183  
184  
185  
186  
187  
188  
189  
190  
191  
192  
193  
194  
195  
196  
197  
198  
199  
200  
201  
202  
203  
204  
205  
206  
207  
208  
209  
210  
211  
212  
213  
214  
215  
216  
217  
218  
219  
220  
221  
222  
223  
224  
225  
226  
227  
228  
229  
230  
231  
232  
233  
234  
235  
236  
237  
238  
239  
240  
241  
242  
243  
244  
245  
246  
247  
248  
249  
250  
251  
252  
253  
254  
255  
256  
257  
258  
259  
260  
261  
262  
263  
264  
265  
266  
267  
268  
269  
270  
271  
272  
273  
274  
275  
276  
277  
278  
279  
280  
281  
282  
283  
284  
285  
286  
287  
288  
289  
290  
291  
292  
293  
294  
295  
296  
297  
298  
299  
300  
301  
302  
303  
304  
305  
306  
307  
308  
309  
310  
311  
312  
313  
314  
315  
316  
317  
318  
319  
320  
321  
322  
323  
324  
325  
326  
327  
328  
329  
330  
331  
332  
333  
334  
335  
336  
337  
338  
339  
340  
341  
342  
343  
344  
345  
346  
347  
348  
349  
350  
351  
352  
353  
354  
355  
356  
357  
358  
359  
360  
361  
362  
363  
364  
365  
366  
367  
368  
369  
370  
371  
372  
373  
374  
375  
376  
377  
378  
379  
380  
381  
382  
383  
384  
385  
386  
387  
388  
389  
390  
391  
392  
393  
394  
395  
396  
397  
398  
399  
400  
401  
402  
403  
404  
405  
406  
407  
408  
409  
410  
411  
412  
413  
414  
415  
416  
417  
418  
419  
420  
421  
422  
423  
424  
425  
426  
427  
428  
429  
430  
431  
432  
433  
434  
435  
436  
437  
438  
439  
440  
441  
442  
443  
444  
445  
446  
447  
448  
449  
450  
451  
452  
453  
454  
455  
456  
457  
458  
459  
460  
461  
462  
463  
464  
465  
466  
467  
468  
469  
470  
471  
472  
473  
474  
475  
476  
477  
478  
479  
480  
481  
482  
483  
484  
485  
486  
487  
488  
489  
490  
491  
492  
493  
494  
495  
496  
497  
498  
499  
500  
501  
502  
503  
504  
505  
506  
507  
508  
509  
510  
511  
512  
513  
514  
515  
516  
517  
518  
519  
520  
521  
522  
523  
524  
525  
526  
527  
528  
529  
530  
531  
532  
533  
534  
535  
536  
537  
538  
539  
540  
541  
542  
543  
544  
545  
546  
547  
548  
549  
550  
551  
552  
553  
554  
555  
556  
557  
558  
559  
560  
561  
562  
563  
564  
565  
566  
567  
568  
569  
570  
571  
572  
573  
574  
575  
576  
577  
578  
579  
580  
581  
582  
583  
584  
585  
586  
587  
588  
589  
590  
591  
592  
593  
594  
595  
596  
597  
598  
599  
600  
601  
602  
603  
604  
605  
606  
607  
608  
609  
610  
611  
612  
613  
614  
615  
616  
617  
618  
619  
620  
621  
622  
623  
624  
625  
626  
627  
628  
629  
630  
631  
632  
633  
634  
635  
636  
637  
638  
639  
640  
641  
642  
643  
644  
645  
646  
647  
648  
649  
650  
651  
652  
653  
654  
655  
656  
657  
658  
659  
660  
661  
662  
663  
664  
665  
666  
667  
668  
669  
670  
671  
672  
673  
674  
675  
676  
677  
678  
679  
680  
681  
682  
683  
684  
685  
686  
687  
688  
689  
690  
691  
692  
693  
694  
695  
696  
697  
698  
699  
700  
701  
702  
703  
704  
705  
706  
707  
708  
709  
710  
711  
712  
713  
714  
715  
716  
717  
718  
719  
720  
721  
722  
723  
724  
725  
726  
727  
728  
729  
730  
731  
732  
733  
734  
735  
736  
737  
738  
739  
740  
741  
742  
743  
744  
745  
746  
747  
748  
749  
750  
751  
752  
753  
754  
755  
756  
757  
758  
759  
760  
761  
762  
763  
764  
765  
766  
767  
768  
769  
770  
771  
772  
773  
774  
775  
776  
777  
778  
779  
780  
781  
782  
783  
784  
785  
786  
787  
788  
789  
790  
791  
792  
793  
794  
795  
796  
797  
798  
799  
800  
801  
802  
803  
804  
805  
806  
807  
808  
809  
810  
811  
812  
813  
814  
815  
816  
817  
818  
819  
820  
821  
822  
823  
824  
825  
826  
827  
828  
829  
830  
831  
832  
833  
834  
835  
836  
837  
838  
839  
840  
841  
842  
843  
844  
845  
846  
847  
848  
849  
850  
851  
852  
853  
854  
855  
856  
857  
858  
859  
860  
861  
862  
863  
864  
865  
866  
867  
868  
869  
870  
871  
872  
873  
874  
875  
876  
877  
878  
879  
880  
881  
882  
883  
884  
885  
886  
887  
888  
889  
890  
891  
892  
893  
894  
895  
896  
897  
898  
899  
900  
901  
902  
903  
904  
905  
906  
907  
908  
909  
910  
911  
912  
913  
914  
915  
916  
917  
918  
919  
920  
921  
922  
923  
924  
925  
926  
927  
928  
929  
930  
931  
932  
933  
934  
935  
936  
937  
938  
939  
940  
941  
942  
943  
944  
945  
946  
947  
948  
949  
950  
951  
952  
953  
954  
955  
956  
957  
958  
959  
960  
961  
962  
963  
964  
965  
966  
967  
968  
969  
970  
971  
972  
973  
974  
975  
976  
977  
978  
979  
980  
981  
982  
983  
984  
985  
986  
987  
988  
989  
990  
991  
992  
993  
994  
995  
996  
997  
998  
999  
1000

1 *Subject: bmjopen-2013-004720.R1.: Failure to address potential bias in CCT*

2  
3 of results with respect to different baseline values, and confounder control can limit additional  
4  
5 bias. For example, Ioannidis 2001 [23] reported that discrepancies between RCT and CCT  
6  
7 were less common when only CCT with a prospective design were considered. The Cochrane  
8  
9 Collaboration offers a guide for inclusion of nonrandomized studies [24] and it has developed  
10  
11 a tool for assessing the risk of bias in both RCT and CCT [25]. Guidelines for reporting ob-  
12  
13 servational studies have been published to improve their quality [5]. Cox regression analysis,  
14  
15 propensity-score-based analysis, and instrumental variable analysis are methods that have  
16  
17 been used for correction of confounding bias in non-randomized studies [26]. Different values  
18  
19 of various outcome measures between groups may be simply caused by different baseline data  
20  
21 in lieu of absent significant treatment effects. We accepted any type of method adjusting or  
22  
23 stratifying for one or more known differences in baseline characteristics. Nevertheless, it  
24  
25 should be kept in mind that methods of adjustment do not guarantee removal of bias and that  
26  
27 residual confounding may remain high [22]. Concerning the non-randomized design, we  
28  
29 strongly recommend the use of methods for adjusting the results for confounders to aim for a  
30  
31 less biased estimation of the treatment effect [27] and the adoption of guidelines for the re-  
32  
33 porting of observational studies [5].  
34  
35  
36  
37  
38

### 39 **Strengths and limitations**

40  
41  
42 The strengths of the present study are a comprehensive literature search, strict adherence to  
43  
44 the projected methodology, the identification of lack of quality in PRO studies and addressing  
45  
46 the specific problems of PRO studies. We should consider some limitations: The study is con-  
47  
48 fined to a single disease and conclusions drawn from its results may not be generalizable to  
49  
50 other diseases. The arbitrary limits set for inclusion of studies are responsible for the extent of  
51  
52 excluded studies. These limits may be questioned by other investigators. During re-evaluation  
53  
54 of study quality, we found that one study fulfilled all criteria, although, this study was exclud-  
55  
56  
57  
58  
59  
60

1 *Subject: bmjopen-2013-004720.R1.: Failure to address potential bias in CCT*

2 ed in previous reports [28]. The minimum follow-up of 70% for inclusion was set arbitrarily  
3 and others might find this threshold too low. We did not endorse the recently published re-  
4 porting of PRO in randomized trials, an extension of the CONSORT statement [4]. All in-  
5 cluded studies in the present review are nonrandomized. We think that the lack of randomiza-  
6 tion is the prevailing issue. We did not endorse the CONSORT PRO extension for another  
7 reason. The included studies were published many years before this extension was published.  
8 There might be a need to develop an extension of the STROBE statement [5] aiming to im-  
9 prove the reporting of PRO in nonrandomized studies. This extension could emphasize the  
10 specific challenges of reporting PRO with respect to lack of randomization.  
11  
12  
13  
14  
15  
16  
17  
18  
19  
20  
21  
22  
23  
24  
25  
26  
27  
28  
29  
30  
31  
32  
33  
34  
35  
36  
37  
38  
39  
40  
41  
42  
43  
44  
45  
46  
47  
48  
49  
50  
51  
52  
53  
54  
55  
56  
57  
58  
59  
60

1  
2  
3  
4  
5  
6  
7  
8  
9  
10  
11  
12  
13  
14  
15  
16  
17  
18  
19  
20  
21  
22  
23  
24  
25  
26  
27  
28  
29  
30  
31  
32  
33  
34  
35  
36  
37  
38  
39  
40  
41  
42  
43  
44  
45  
46  
47  
48  
49  
50  
51  
52  
53  
54  
55  
56  
57  
58  
59  
60

*Subject: bmjopen-2013-004720.R1.: Failure to address potential bias in CCT*

## Conclusions

We found that a considerable number of non-randomized controlled reporting patient-reported outcomes were excluded from a systematic review because of a lack of predefined reporting requirements. The assumed overall risk of bias was regarded too high to consider the data of these studies for inclusion in the systematic review. With respect to the reporting of patient-reported outcomes, active efforts are required to improve the quality of reporting in nonrandomized controlled trials and to increase the number of randomized controlled trials.

1 *Subject: bmjopen-2013-004720.R1.: Failure to address potential bias in CCT*

## 2 **Acknowledgements**

3  
4  
5  
6  
7 Acknowledgements: The authors declare that they have no competing interests. Parts of the  
8  
9 study have been presented at 19th Cochrane Colloquium 19 to 22 October 2011 in Madrid,  
10  
11 Spain. No funding bodies had any role in study design, data collection and analysis, decision  
12  
13 to publish, or preparation of the manuscript.

14  
15  
16  
17 Funding: This research received no specific grant from any funding agency in the public,  
18  
19 commercial or not-for-profit sectors. The University of Cologne provided fulltexts. The fun-  
20  
21 ders had no role in study design, data collection and analysis, decision to publish, or prepara-  
22  
23 tion of the manuscript.

24  
25  
26 Competing interests: None declared

27  
28  
29  
30 Author contribution: Conceived and designed the experiments: FP. Performed the experi-  
31  
32 ments: FP. Analyzed the data: FP MP. Wrote the manuscript: FP AML CT MP.

33  
34  
35 Reporting guidelines: PRISMA checklist is attached

Subject: bmjopen-2013-004720.R1.: Failure to address potential bias in CCT

## References

1. Peinemann F, Grouven U, Bartel C, et al. Permanent interstitial low-dose rate brachytherapy for patients with localized prostate cancer – a systematic review of randomized and non-randomized controlled clinical trials. *Eur Urol* 2011;**60**(5):881-93
2. Patrick D, Guyatt GH, Acquadro C. Chapter 17: Patient-reported outcomes. In: Higgins JPT, Green S, eds. *Cochrane Handbook for Systematic Reviews of Interventions* Version 510 [updated March 2011]. Chichester: The Cochrane Collaboration, 2011.
3. Schulz KF, Altman DG, Moher D, et al. CONSORT 2010 statement: updated guidelines for reporting parallel group randomised trials. *PLoS Med* 2010;**7**(3):e1000251
4. Calvert M, Blazeby J, Altman DG, et al. Reporting of patient-reported outcomes in randomized trials: the CONSORT PRO extension. *JAMA* 2013;**309**(8):814-22
5. von Elm E, Altman DG, Egger M, et al. The Strengthening the Reporting of Observational Studies in Epidemiology (STROBE) statement: guidelines for reporting observational studies. *PLoS Med* 2007;**4**(10):e296
6. O'Connor D, Green S, Higgins JPT. Chapter 5: Defining the review question and developing criteria for including studies. In: Higgins JPT, Green S, eds. *Cochrane Handbook for Systematic Reviews of Interventions* Version 510 [updated March 2011]. Chichester: The Cochrane Collaboration, 2011.
7. *Methods Guide for Medical Test Reviews*. AHRQ Publication No. 12-EC017. Rockville: Agency for Healthcare Research and Quality, 2012.
8. White CM, Ip S, McPheeters M, et al. Using existing systematic reviews to replace de novo processes in conducting Comparative Effectiveness Reviews. *Methods Guide for Comparative Effectiveness Reviews*. Rockville: Agency for Healthcare Research and Quality, 2009.
9. Ebele JN, Sauter G, Epstein JI, et al. *Pathology and genetics of tumours of the urinary system and male genital organs*. Lyon: IARC Press, 2004.
10. Heidenreich A, Bolla M, Joniau S, et al. Guidelines on prostate cancer. Arnhem: European Association of Urology, 2011.
11. Prostate cancer. Guideline for the management of clinically localized prostate cancer: 2007 update. Linthicum: American Urological Association, 2007.
12. Nath R. Overview of brachytherapy physics. In: Thomadsen BR, Rivard MR, Butler W, eds. *Brachytherapy physics*. Second ed. Madison: Medical Physics Publishing, 2005.
13. Wilt TJ, MacDonald R, Rutks I, et al. Systematic review: comparative effectiveness and harms of treatments for clinically localized prostate cancer. *Ann Intern Med* 2008;**148**(6):435-48

1 *Subject: bmjopen-2013-004720.R1.: Failure to address potential bias in CCT*

- 2
- 3 14. Koukourakis G, Kelekis N, Armonis V, et al. Brachytherapy for prostate cancer: a  
4 systematic review. *Adv Urol* 2009;327945
- 5
- 6 15. Rosenthal SA, Bittner NH, Beyer DC, et al. American Society for Radiation Oncology  
7 (ASTRO) and American College of Radiology (ACR) practice guideline for the  
8 transperineal permanent brachytherapy of prostate cancer. *Int J Radiat Oncol Biol Phys*  
9 2011;**79**(2):335-41
- 10
- 11 16. Crook JM, Gomez-Iturriaga A, Wallace K, et al. Comparison of health-related quality of  
12 life 5 years after SPIRIT (Surgical Prostatectomy [RP] versus Interstitial Radiation [BT]  
13 Intervention trial ACOSOG Z0070). *Int J Radiat Oncol Biol Phys* 2010;**78**(3 Suppl  
14 1):S76
- 15
- 16
- 17 17. Etter JF, Perneger TV. Analysis of non-response bias in a mailed health survey. *J Clin*  
18 *Epidemiol* 1997;**50**(10):1123-8
- 19
- 20 18. Schulz KF, Grimes DA. Sample size slippages in randomised trials: exclusions and the  
21 lost and wayward. *Lancet* 2002;**359**(9308):781-5
- 22
- 23 19. Smeeth L, Fletcher AE. Improving the response rates to questionnaires. *BMJ*  
24 2002;**324**(7347):1168-9
- 25
- 26 20. Brealey SD, Atwell C, Bryan S, et al. Improving response rates using a monetary  
27 incentive for patient completion of questionnaires: an observational study. *BMC Med*  
28 *Res Methodol* 2007;**7**:12
- 29
- 30 21. Edwards PJ, Roberts I, Clarke MJ, et al. Methods to increase response to postal and  
31 electronic questionnaires. *Cochrane Database Syst Rev* 2009(3):MR000008
- 32
- 33 22. Deeks JJ, Dinnes J, D'Amico R, et al. Evaluating non-randomised intervention studies.  
34 *Health Technol Assess* 2003;**7**(27):iii-x, 1-173
- 35
- 36 23. Ioannidis JP, Haidich AB, Pappa M, et al. Comparison of evidence of treatment effects in  
37 randomized and nonrandomized studies. *JAMA : the journal of the American Medical*  
38 *Association* 2001;**286**(7):821-30
- 39
- 40 24. Reeves BC, Deeks JJ, Higgins JPT, et al. Chapter 13: Including non-randomized studies.  
41 In: Higgins JPT, Green S, eds. *Cochrane Handbook for Systematic Reviews of*  
42 *Interventions* Version 510 [updated March 2011]. Chichester: The Cochrane  
43 *Collaboration*, 2011.
- 44
- 45 25. Higgins JPT, Altman DG, Sterne JAC. Chapter 8 Assessing risk of bias in included  
46 studies. In: Higgins JPT, Green S, eds. *Cochrane Handbook for Systematic Reviews of*  
47 *Interventions* Version 510 [updated March 2011]. Oxford: The Cochrane Collaboration,  
48 2011.
- 49
- 50 26. Schmoor C, Gall C, Stampf S, et al. Correction of confounding bias in non-randomized  
51 studies by appropriate weighting. *Biom J* 2011;**53**(2):369-87
- 52
- 53 27. Cox E, Martin BC, Van Staa T, et al. Good research practices for comparative  
54 effectiveness research: approaches to mitigate bias and confounding in the design of  
55 nonrandomized studies of treatment effects using secondary data sources: the
- 56
- 57
- 58
- 59
- 60

1  
2  
3  
4  
5  
6  
7  
8  
9  
10  
11  
12  
13  
14  
15  
16  
17  
18  
19  
20  
21  
22  
23  
24  
25  
26  
27  
28  
29  
30  
31  
32  
33  
34  
35  
36  
37  
38  
39  
40  
41  
42  
43  
44  
45  
46  
47  
48  
49  
50  
51  
52  
53  
54  
55  
56  
57  
58  
59  
60

*Subject: bmjopen-2013-004720.R1.: Failure to address potential bias in CCT*

International Society for Pharmacoeconomics and Outcomes Research Good Research Practices for Retrospective Database Analysis Task Force Report--Part II. *Value Health* 2009;**12**(8):1053-61

28. Pinkawa M, Asadpour B, Piroth MD, et al. Health-related quality of life after permanent I-125 brachytherapy and conformal external beam radiotherapy for prostate cancer: a matched-pair comparison. *Radiother Oncol* 2009;**91**(2):225-31
29. Bacon CG, Giovannucci E, Testa M, et al. The impact of cancer treatment on quality of life outcomes for patients with localized prostate cancer. *J Urol* 2001;**166**(5):1804-10
30. Ball AJ, Gambill B, Fabrizio MD, et al. Prospective longitudinal comparative study of early health-related quality-of-life outcomes in patients undergoing surgical treatment for localized prostate cancer: a short-term evaluation of five approaches from a single institution. *J Endourol* 2006;**20**(10):723-31
31. Befort CA, Zelefsky MJ, Scardino PT, et al. A measure of health-related quality of life among patients with localized prostate cancer: Results from ongoing scale development. *Clinical Prostate Cancer* 2005;**4**(2):100-08
32. Bergman J, Gore JL, Penson DF, et al. Erectile aid use by men treated for localized prostate cancer. *J Urol* 2009;**182**(2):649-54
33. Bergman J, Kwan L, Litwin MS. Improving decisions for men with prostate cancer: translational outcomes research. *J Urol* 2010;**183**(6):2186-92
34. Brandeis JM, Litwin MS, Burnison CM, et al. Quality of life outcomes after brachytherapy for early stage prostate cancer. *J Urol* 2000;**163**(3):851-57
35. Brown MW, Brooks JP, Albert PS, et al. An analysis of erectile function after intensity modulated radiation therapy for localized prostate carcinoma. *Prostate Cancer Prostatic Dis* 2007;**10**(2):189-93
36. Burnett AL, Aus G, Canby-Hagino ED, et al. Erectile function outcome reporting after clinically localized prostate cancer treatment. *J Urol* 2007;**178**(2):597-601
37. Chaikin DC, Broderick GA, Malloy TR, et al. Erectile dysfunction following minimally invasive treatments for prostate cancer. *Urology* 1996;**48**(1):100-04
38. Chen RC, Clark JA, Talcott JA. Individualizing quality-of-life outcomes reporting: how localized prostate cancer treatments affect patients with different levels of baseline urinary, bowel, and sexual function. *J Clin Oncol* 2009;**27**(24):3916-22
39. Choo R, Long J, Gray R, et al. Prospective survey of sexual function among patients with clinically localized prostate cancer referred for definitive radiotherapy and the impact of radiotherapy on sexual function. *Support Care Cancer* 2010;**18**(6):715-22
40. Clark JA, Inui TS, Silliman RA, et al. Patients' perceptions of quality of life after treatment for early prostate cancer. *J Clin Oncol* 2003;**21**(20):3777-84



1 *Subject: bmjopen-2013-004720.R1.: Failure to address potential bias in CCT*

- 2
- 3 41. Downs TM, Sadetsky N, Pasta DJ, et al. Health related quality of life patterns in patients  
4 treated with interstitial prostate brachytherapy for localized prostate cancer--data from  
5 CaPSURE. *J Urol* 2003;**170**(5):1822-7
- 6
- 7 42. Eton DT, Lepore SJ, Helgeson VS. Early quality of life in patients with localized prostate  
8 carcinoma: an examination of treatment-related, demographic, and psychosocial factors.  
9 *Cancer* 2001;**92**(6):1451-9
- 10
- 11 43. Frank SJ, Pisters LL, Davis J, et al. An assessment of quality of life following radical  
12 prostatectomy, high dose external beam radiation therapy and brachytherapy iodine  
13 implantation as monotherapies for localized prostate cancer. *J Urol* 2007;**177**(6):2151-56
- 14
- 15 44. Fulmer BR, Bissonette EA, Petroni GR, et al. Prospective assessment of voiding and  
16 sexual function after treatment for localized prostate carcinoma: comparison of radical  
17 prostatectomy to hormonobrachytherapy with and without external beam radiotherapy.  
18 *Cancer* 2001;**91**(11):2046-55
- 19
- 20 45. Gore JL, Kwan L, Lee SP, et al. Survivorship beyond convalescence: 48-month quality-  
21 of-life outcomes after treatment for localized prostate cancer. *J Natl Cancer Inst*  
22 2009;**101**(12):888-92
- 23
- 24 46. Guedea F, Ferrer M, Pera J, et al. Quality of life two years after radical prostatectomy,  
25 prostate brachytherapy or external beam radiotherapy for clinically localised prostate  
26 cancer: the Catalan Institute of Oncology/Bellvitge Hospital experience. *Clin Transl*  
27 *Oncol* 2009;**11**(7):470-78
- 28
- 29 47. Hashine K, Kusuhara Y, Miura N, et al. A prospective longitudinal study comparing a  
30 radical retropubic prostatectomy and permanent prostate brachytherapy regarding the  
31 health-related quality of life for localized prostate cancer. *Jpn J Clin Oncol*  
32 2008;**38**(7):480-85
- 33
- 34 48. Hashine K, Kusuhara Y, Miura N, et al. Health-related quality of life using SF-8 and  
35 EPIC questionnaires after treatment with radical retropubic prostatectomy and permanent  
36 prostate brachytherapy. *Jpn J Clin Oncol* 2009;**39**(8):502-08
- 37
- 38 49. Hervouet S, Savard J, Simard S, et al. Psychological functioning associated with prostate  
39 cancer: cross-sectional comparison of patients treated with radiotherapy, brachytherapy,  
40 or surgery. *J Pain Symptom Manage* 2005;**30**(5):474-84
- 41
- 42 50. Hollenbeck BK, Dunn RL, Wei JT, et al. Neoadjuvant hormonal therapy and older age are  
43 associated with adverse sexual health-related quality-of-life outcome after prostate  
44 brachytherapy. *Urology* 2002;**59**(4):480-4
- 45
- 46 51. Jo Y, Junichi H, Tomohiro F, et al. Radical prostatectomy versus high-dose rate  
47 brachytherapy for prostate cancer: effects on health-related quality of life. *BJU Int*  
48 2005;**96**(1):43-47
- 49
- 50 52. Johnstone PA, Gray C, Powell CR. Quality of life in T1-3N0 prostate cancer patients  
51 treated with radiation therapy with minimum 10-year follow-up. *Int J Radiat Oncol Biol*  
52 *Phys* 2000;**46**(4):833-8
- 53
- 54
- 55
- 56
- 57
- 58
- 59
- 60

1  
2  
3  
4  
5  
6  
7  
8  
9  
10  
11  
12  
13  
14  
15  
16  
17  
18  
19  
20  
21  
22  
23  
24  
25  
26  
27  
28  
29  
30  
31  
32  
33  
34  
35  
36  
37  
38  
39  
40  
41  
42  
43  
44  
45  
46  
47  
48  
49  
50  
51  
52  
53  
54  
55  
56  
57  
58  
59  
60

*Subject: bmjopen-2013-004720.R1.: Failure to address potential bias in CCT*

53. Joly F, Brune D, Couette JE, et al. Health-related quality of life and sequelae in patients treated with brachytherapy and external beam irradiation for localized prostate cancer. *Ann Oncol* 1998;**9**:(7):751-57
54. Kakehi Y, Takegami M, Suzukamo Y, et al. Health related quality of life in Japanese men with localized prostate cancer treated with current multiple modalities assessed by a newly developed Japanese version of the Expanded Prostate Cancer Index Composite. *J Urol* 2007;**177**(5):1856-61
55. Lev EL, Eller LS, Gejerman G, et al. Quality of life of men treated for localized prostate cancer: outcomes at 6 and 12 months. *Support Care Cancer* 2009;**17**(5):509-17
56. Lilleby W, Fossa SD, Waehre HR, et al. Long-term morbidity and quality of life in patients with localized prostate cancer undergoing definitive radiotherapy or radical prostatectomy. *Int J Radiat Oncol Biol Phys* 1999;**43**(4):735-43
57. Litwin MS, Sadetsky N, Pasta DJ, et al. Bowel function and bother after treatment for early stage prostate cancer: a longitudinal quality of life analysis from CaPSURE. *J Urol* 2004;**172**(2):515-9
58. Litwin MS, Gore JL, Kwan L, et al. Quality of life after surgery, external beam irradiation, or brachytherapy for early-stage prostate cancer. *Cancer* 2007;**109**(11):2239-47
59. Mehta SS, Lubeck DP, Pasta DJ, et al. Fear of cancer recurrence in patients undergoing definitive treatment for prostate cancer: results from CaPSURE. *J Urol* 2003;**170**:(5):1931-33
60. Miller DC, Sanda MG, Dunn RL, et al. Long-term outcomes among localized prostate cancer survivors: health-related quality-of-life changes after radical prostatectomy, external radiation, and brachytherapy. *J Clin Oncol* 2005;**23**(12):2772-80
61. Miller DC, Wei JT, Dunn RL, et al. Use of medications or devices for erectile dysfunction among long-term prostate cancer treatment survivors: potential influence of sexual motivation and/or indifference. *Urology* 2006;**68**(1):166-71
62. Monahan PO, Champion V, Rawl S, et al. What contributes more strongly to predicting QOL during 1-year recovery from treatment for clinically localized prostate cancer: 4-weeks-post-treatment depressive symptoms or type of treatment? *Qual Life Res* 2007;**16**(3):399-411
63. Namiki S, Satoh T, Baba S, et al. Quality of life after brachytherapy or radical prostatectomy for localized prostate cancer: a prospective longitudinal study. *Urology* 2006;**68**(6):1230-36
64. Namiki S, Kwan L, Kagawa-Singer M, et al. Distress and social dysfunction following prostate cancer treatment: a longitudinal cross-cultural comparison of Japanese and American men. *Prostate Cancer Prostatic Dis* 2009;**12**(1):67-71
65. Ohashi T, Yoroza A, Toya K, et al. Serial changes of international prostate symptom score following I-125 prostate brachytherapy. *Int J Clin Oncol* 2006;**11**(4):320-25

1 *Subject: bmjopen-2013-004720.R1.: Failure to address potential bias in CCT*

- 2  
3 66. Pinkawa M, Fishedick K, Gagel B, et al. Association of neoadjuvant hormonal therapy  
4 with adverse health-related quality of life after permanent iodine-125 brachytherapy for  
5 localized prostate cancer. *Urology* 2006;**68**(1):104-09  
6  
7 67. Roach M, 3rd, Chinn DM, Holland J, et al. A pilot survey of sexual function and quality  
8 of life following 3D conformal radiotherapy for clinically localized prostate cancer. *Int J*  
9 *Radiat Oncol Biol Phys* 1996;**35**(5):869-74  
10  
11 68. Sanda MG, Dunn RL, Michalski J, et al. Quality of life and satisfaction with outcome  
12 among prostate-cancer survivors. *N Engl J Med* 2008;**358**(12):1250-61  
13  
14 69. Schover LR, Fouladi RT, Warneke CL, et al. Defining sexual outcomes after treatment for  
15 localized prostate carcinoma. *Cancer* 2002;**95**(8):1773-85  
16  
17 70. Soderdahl DW, Davis JW, Schellhammer PF, et al. Prospective longitudinal comparative  
18 study of health-related quality of life in patients undergoing invasive treatments for  
19 localized prostate cancer. *J Endourol* 2005;**19**(3):318-26  
20  
21 71. Speight JL, Elkin EP, Pasta DJ, et al. Longitudinal assessment of changes in sexual  
22 function and bother in patients treated with external beam radiotherapy or brachytherapy,  
23 with and without neoadjuvant androgen ablation: data from CaPSURE. *Int J Radiat*  
24 *Oncol Biol Phys* 2004;**60**(4):1066-75  
25  
26 72. Stone NN, Marshall DT, Stone JJ, et al. Does neoadjuvant hormonal therapy improve  
27 urinary function when given to men with large prostates undergoing prostate  
28 brachytherapy? *J Urol* 2010;**183**(2):634-39  
29  
30 73. Trojan L, Harrer K, Schafer J, et al. [Complications and side effects of low dose rate  
31 brachytherapy for the treatment of prostate cancer: data on a 13 year follow-up study  
32 from Mannheim]. *Urologe A* 2007;**46**(11):1542-47  
33  
34 74. Tward JD, Lee CM, Pappas LM, et al. Survival of men with clinically localized prostate  
35 cancer treated with prostatectomy, brachytherapy, or no definitive treatment: impact of  
36 age at diagnosis. *Cancer* 2006;**107**(10):2392-400  
37  
38 75. Valicenti RK, Bissondtte EA, Chen C, et al. Longitudinal comparison of sexual function  
39 after 3-dimensional conformal radiation therapy or prostate brachytherapy. *J Urol*  
40 2002;**168**(6):2499-504  
41  
42 76. Van de Poll-Franse LV, Sadetsky N, Kwan L, et al. Severity of cardiovascular disease and  
43 health-related quality of life in men with prostate cancer: a longitudinal analysis from  
44 CaPSURE. *Qual Life Res* 2008;**17**(6):845-55  
45  
46 77. Wyler SF, Engeler DS, Seelentag W, et al. Health-related quality of life after radical  
47 prostatectomy and low-dose-rate brachytherapy for localized prostate cancer. *Urol Int*  
48 2009;**82**(1):17-23  
49  
50 78. Zagar TM, Stock RG, Cesaretti JA, et al. Assessment of postbrachytherapy sexual  
51 function: a comparison of the IIEF-5 and the MSEFS. *Brachytherapy* 2007;**6**(1):26-33  
52  
53  
54  
55  
56  
57  
58  
59  
60

1 *Subject: bmjopen-2013-004720.R1.: Failure to address potential bias in CCT*

2  
3 Figure legends

4  
5 Figure 1. Study flow

6 Abbreviation. PICO: population, intervention, comparator, outcome; PRO: patient-reported  
7 outcomes; RCT: randomised controlled trial  
8  
9  
10  
11  
12  
13  
14  
15  
16  
17  
18  
19  
20  
21  
22  
23  
24  
25  
26  
27  
28  
29  
30  
31  
32  
33  
34  
35  
36  
37  
38  
39  
40  
41  
42  
43  
44  
45  
46  
47  
48  
49  
50  
51  
52  
53  
54  
55  
56  
57  
58  
59  
60

For peer review only

1  
2  
3  
4  
5  
6  
7  
8  
9  
10  
11  
12  
13  
14  
15  
16  
17  
18  
19  
20  
21  
22  
23  
24  
25  
26  
27  
28  
29  
30  
31  
32  
33  
34  
35  
36  
37  
38  
39  
40  
41  
42  
43  
44  
45  
46  
47  
48  
49

Subject: *bmjopen-2013-004720.R1.: Failure to address potential bias in CCT*

Table 1. Reasons for excluding PRO articles

| Nonrandomized studies | Inclusion criteria |     |     |     | Requirements to contain high risk of bias |                     |                                  |                                       | Comments                     |
|-----------------------|--------------------|-----|-----|-----|-------------------------------------------|---------------------|----------------------------------|---------------------------------------|------------------------------|
|                       | P                  | I   | C   | O   | Response ≥70%                             | Baseline each group | Baseline comparable/ or adjusted | Statistical comparison between groups |                              |
| Bacon 2001 [29]       | yes                | yes | NO  | -   | -                                         | -                   | -                                | -                                     | No concurrent group          |
| Ball 2006 [30]        | yes                | yes | NO  | -   | -                                         | -                   | -                                | -                                     | Cryotherapy                  |
| Befort 2005 [31]      | yes                | yes | yes | yes | NO                                        | -                   | -                                | -                                     | Low response                 |
| Bergman 2009 [32]     | yes                | yes | yes | yes | yes                                       | yes                 | yes                              | NO                                    | No appropriate test          |
| Bergman 2010 [33]     | yes                | yes | yes | yes | NO                                        | -                   | -                                | -                                     | Low response                 |
| Brandeis 2000 [34]    | yes                | NO  | -   | -   | -                                         | -                   | -                                | -                                     | 29% LDR-BT + EBRT            |
| Brown 2007 [35]       | yes                | NO  | -   | -   | -                                         | -                   | -                                | -                                     | EBRT                         |
| Burnett 2007 [36]     | yes                | yes | yes | yes | NO                                        | -                   | -                                | -                                     | Response not reported        |
| Chaikin 1996 [37]     | NO                 | -   | -   | -   | -                                         | -                   | -                                | -                                     | Staging not reported         |
| Chen 2009 [38]        | yes                | yes | yes | yes | yes                                       | yes                 | NO                               | -                                     | No confounder control        |
| Choo 2010 [39]        | yes                | yes | yes | yes | yes                                       | NO                  | -                                | -                                     | Baseline not reported        |
| Clark 2003 [40]       | yes                | yes | yes | yes | NO                                        | -                   | -                                | -                                     | Low response                 |
| Downs 2003 [41]       | yes                | yes | yes | yes | yes                                       | yes                 | NO                               | -                                     | No confounder control        |
| Eton 2001 [42]        | yes                | yes | yes | yes | NO                                        | -                   | -                                | -                                     | Low response                 |
| Frank 2007 [43]       | yes                | yes | yes | yes | NO                                        | -                   | -                                | -                                     | Low response                 |
| Fulmer 2001 [44]      | yes                | yes | yes | yes | NO                                        | -                   | -                                | -                                     | Response not reported        |
| Gore 2009 [45]        | yes                | yes | yes | yes | NO                                        | -                   | -                                | -                                     | Low response                 |
| Guedea 2009 [46]      | yes                | yes | yes | yes | yes                                       | yes                 | NO                               | -                                     | No confounder control        |
| Hashine 2008 [47]     | yes                | yes | yes | yes | yes                                       | yes                 | NO                               | -                                     | No confounder control        |
| Hashine 2009 [48]     | yes                | yes | yes | yes | yes                                       | yes                 | NO                               | -                                     | No confounder control        |
| Hervouet 2005 [49]    | NO                 | -   | -   | -   | -                                         | -                   | -                                | -                                     | ≥20% T3-T4 in control groups |
| Hollenbeck 2002 [50]  | yes                | NO  | -   | -   | -                                         | -                   | -                                | -                                     | LDR-BT + EBRT                |
| Jo 2005 [51]          | yes                | NO  | -   | -   | -                                         | -                   | -                                | -                                     | High-dose rate brachytherapy |
| Johnstone 2000 [52]   | yes                | NO  | -   | -   | -                                         | -                   | -                                | -                                     | EBRT                         |
| Joly 1998 [53]        | yes                | NO  | -   | -   | -                                         | -                   | -                                | -                                     | LDR-BT + EBRT                |
| Kakehi 2007 [54]      | yes                | yes | yes | yes | yes                                       | NO                  | -                                | -                                     | Baseline not reported        |
| Lev 2009 [55]         | yes                | NO  | -   | -   | -                                         | -                   | -                                | -                                     | LDR-BT + EBRT                |
| Lilleby 1999 [56]     | yes                | NO  | -   | -   | -                                         | -                   | -                                | -                                     | EBRT                         |
| Litwin 2004 [57]      | yes                | yes | yes | yes | NO                                        | -                   | -                                | -                                     | Low response                 |
| Litwin 2007 [58]      | yes                | NO  | -   | -   | -                                         | -                   | -                                | -                                     | 25% LDR-BT + EBRT            |
| Mehta 2003 [59]       | yes                | yes | yes | NO  | -                                         | -                   | -                                | -                                     | "Fear of cancer"             |

Subject: *bmjopen-2013-004720.R1.: Failure to address potential bias in CCT*

| Nonrandomized studies   | Inclusion criteria |     |     |     | Requirements to contain high risk of bias |                        |                                        |                                             | Comments                       |
|-------------------------|--------------------|-----|-----|-----|-------------------------------------------|------------------------|----------------------------------------|---------------------------------------------|--------------------------------|
|                         | P                  | I   | C   | O   | Response<br>≥70%                          | Baseline each<br>group | Baseline<br>comparable/<br>or adjusted | Statistical<br>comparison<br>between groups |                                |
| Miller 2005 [60]        | yes                | NO  | -   | -   | -                                         | -                      | -                                      | -                                           | 44% LDR-BT + EBRT              |
| Miller 2006 [61]        | yes                | yes | yes | yes | yes                                       | NO                     | -                                      | -                                           | Baseline not reported          |
| Monahan 2007 [62]       | yes                | yes | yes | yes | NO                                        | -                      | -                                      | -                                           | Low response                   |
| Namiki 2006 [63]        | yes                | yes | yes | yes | NO                                        | -                      | -                                      | -                                           | Low response                   |
| Namiki 2009 [64]        | yes                | yes | yes | yes | NO                                        | -                      | -                                      | -                                           | Low response                   |
| Ohashi 2006 [65]        | yes                | yes | yes | yes | NO                                        | -                      | -                                      | -                                           | Low response                   |
| Pinkawa 2006 [66]       | yes                | yes | NO  | -   | -                                         | -                      | -                                      | -                                           | LDR-BT + hormones <sup>†</sup> |
| Roach 1996 [67]         | yes                | NO  | -   | -   | -                                         | -                      | -                                      | -                                           | EBRT, single-arm trial         |
| Sanda 2008 [68]         | yes                | yes | yes | yes | NO                                        | -                      | -                                      | -                                           | Low response                   |
| Schover 2002 [69]       | yes                | yes | yes | yes | NO                                        | -                      | -                                      | -                                           | Low response                   |
| Soderdahl 2005 [70]     | yes                | yes | yes | yes | NO                                        | -                      | -                                      | -                                           | Low response                   |
| Speight 2004 [71]       | yes                | yes | yes | yes | NO                                        | -                      | -                                      | -                                           | Response not reported          |
| Stone 2010 [72]         | yes                | yes | NO  | -   | -                                         | -                      | -                                      | -                                           | LDR-BT + hormones <sup>†</sup> |
| Trojan 2007 [73]        | yes                | yes | yes | yes | NO                                        | -                      | -                                      | -                                           | Low response                   |
| Tward 2006 [74]         | yes                | yes | yes | NO  | -                                         | -                      | -                                      | -                                           | Mortality differs <sup>§</sup> |
| Valicenti 2002 [75]     | yes                | yes | yes | yes | NO                                        | -                      | -                                      | -                                           | Response not reported          |
| Van de Poll-F 2008 [76] | yes                | NO  | -   | -   | -                                         | -                      | -                                      | -                                           | LDR-BT + EBRT                  |
| Wyler 2009 [77]         | yes                | yes | yes | yes | yes                                       | yes                    | NO                                     | -                                           | No confounder control          |
| Zagar 2007 [78]         | yes                | NO  | -   | -   | -                                         | -                      | -                                      | -                                           | LDR-BT + EBRT                  |
| "NO" counts             | 2                  | 13  | 4   | 2   | 19                                        | 3                      | 6                                      | 1                                           | Total: 50 studies              |
|                         | PICO not met: 21   |     |     |     | High risk of bias: 29                     |                        |                                        |                                             |                                |

-: not appropriate

\*Mehta 2003: no appropriate endpoint

<sup>†</sup>Pinkawa 2006; Stone 2010: neoadjuvant hormonal therapy

<sup>§</sup>Tward 2006: non-disease-related mortality differs greatly

Abbreviations: C: comparison of interest is radical prostatectomy, external beam radiotherapy, or no primary therapy; EBRT: external beam radiotherapy; I: intervention of interest is low-dose rate brachytherapy as monotherapy; LDR-BT: permanent interstitial low-dose rate brachytherapy; O: outcome of interest is function, bother, or generic health-related quality of life; P: patients with localized prostate cancer; PRO: patient-reported outcomes

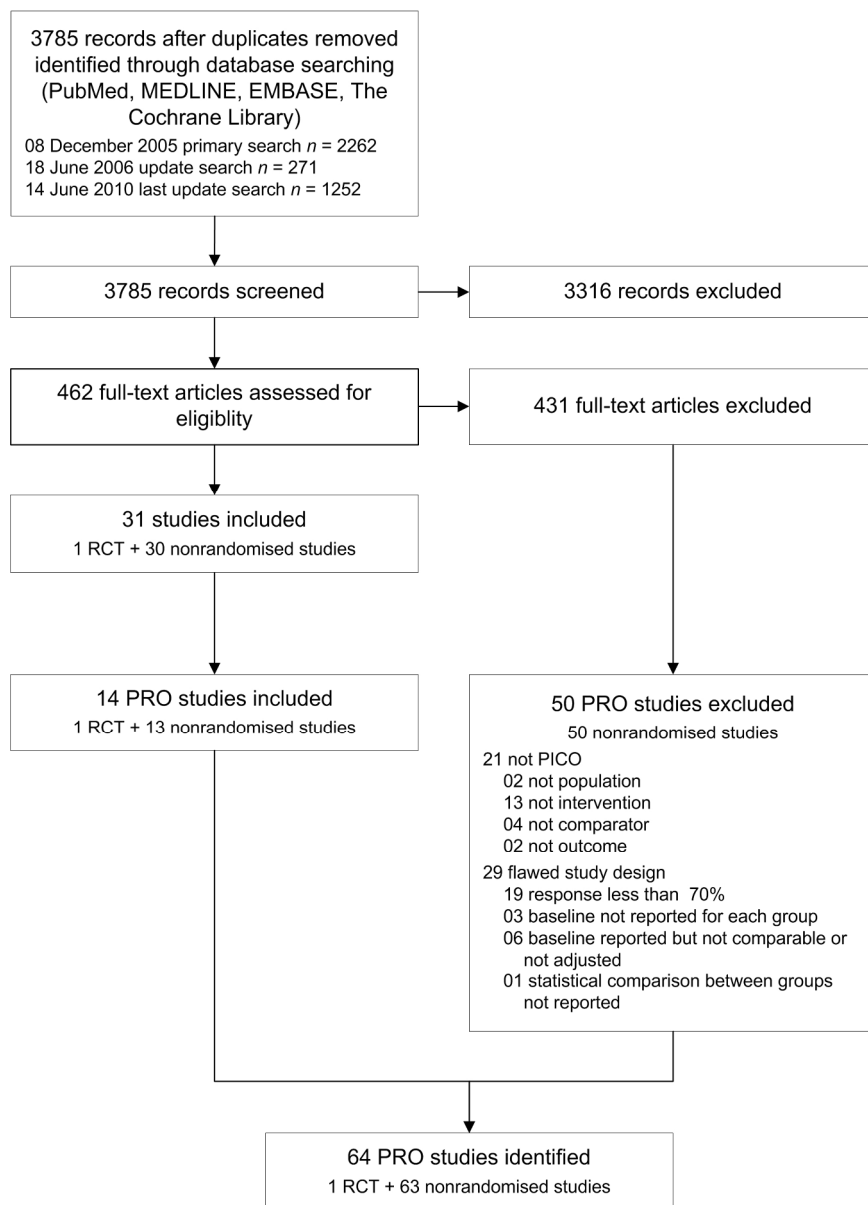

Abbreviation. PICO: population, intervention, comparator, outcome; PRO: patient-reported outcomes; RCT: randomised controlled trial  
170x235mm (300 x 300 DPI)

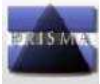

# PRISMA 2009 Checklist

| Section/topic                      | #  | Checklist item                                                                                                                                                                                                                                                                                              | Reported on page # |
|------------------------------------|----|-------------------------------------------------------------------------------------------------------------------------------------------------------------------------------------------------------------------------------------------------------------------------------------------------------------|--------------------|
| <b>TITLE</b>                       |    |                                                                                                                                                                                                                                                                                                             |                    |
| Title                              | 1  | Identify the report as a systematic review, meta-analysis, or both.                                                                                                                                                                                                                                         |                    |
| <b>ABSTRACT</b>                    |    |                                                                                                                                                                                                                                                                                                             |                    |
| Structured summary                 | 2  | Provide a structured summary including, as applicable: background; objectives; data sources; study eligibility criteria, participants, and interventions; study appraisal and synthesis methods; results; limitations; conclusions and implications of key findings; systematic review registration number. | 2                  |
| <b>INTRODUCTION</b>                |    |                                                                                                                                                                                                                                                                                                             |                    |
| Rationale                          | 3  | Describe the rationale for the review in the context of what is already known.                                                                                                                                                                                                                              | 5-6                |
| Objectives                         | 4  | Provide an explicit statement of questions being addressed with reference to participants, interventions, comparisons, outcomes, and study design (PICOS).                                                                                                                                                  | 7                  |
| <b>METHODS</b>                     |    |                                                                                                                                                                                                                                                                                                             |                    |
| Protocol and registration          | 5  | Indicate if a review protocol exists, if and where it can be accessed (e.g., Web address), and, if available, provide registration information including registration number.                                                                                                                               |                    |
| Eligibility criteria               | 6  | Specify study characteristics (e.g., PICOS, length of follow-up) and report characteristics (e.g., years considered, language, publication status) used as criteria for eligibility, giving rationale.                                                                                                      | 7-8                |
| Information sources                | 7  | Describe all information sources (e.g., databases with dates of coverage, contact with study authors to identify additional studies) in the search and date last searched.                                                                                                                                  | figure 1           |
| Search                             | 8  | Present full electronic search strategy for at least one database, including any limits used, such that it could be repeated.                                                                                                                                                                               | 9                  |
| Study selection                    | 9  | State the process for selecting studies (i.e., screening, eligibility, included in systematic review, and, if applicable, included in the meta-analysis).                                                                                                                                                   | 9                  |
| Data collection process            | 10 | Describe method of data extraction from reports (e.g., piloted forms, independently, in duplicate) and any processes for obtaining and confirming data from investigators.                                                                                                                                  | 9-10               |
| Data items                         | 11 | List and define all variables for which data were sought (e.g., PICOS, funding sources) and any assumptions and simplifications made.                                                                                                                                                                       | 9-10               |
| Risk of bias in individual studies | 12 | Describe methods used for assessing risk of bias of individual studies (including specification of whether this was done at the study or outcome level), and how this information is to be used in any data synthesis.                                                                                      | 10                 |
| Summary measures                   | 13 | State the principal summary measures (e.g., risk ratio, difference in means).                                                                                                                                                                                                                               |                    |
| Synthesis of results               | 14 | Describe the methods of handling data and combining results of studies, if done, including measures of consistency (e.g., $I^2$ for each meta-analysis)                                                                                                                                                     |                    |



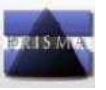

# PRISMA 2009 Checklist

1  
2  
3  
4  
5  
6  
7  
8  
9  
10  
11  
12  
13  
14  
15  
16  
17  
18  
19  
20  
21  
22  
23  
24  
25  
26  
27  
28  
29  
30  
31  
32  
33  
34  
35  
36  
37  
38  
39  
40  
41  
42  
43  
44  
45  
46  
47  
48  
49

| Section/topic                 | #  | Checklist item                                                                                                                                                                                           | Reported on page # |
|-------------------------------|----|----------------------------------------------------------------------------------------------------------------------------------------------------------------------------------------------------------|--------------------|
| Risk of bias across studies   | 15 | Specify any assessment of risk of bias that may affect the cumulative evidence (e.g., publication bias, selective reporting within studies).                                                             |                    |
| Additional analyses           | 16 | Describe methods of additional analyses (e.g., sensitivity or subgroup analyses, meta-regression), if done, indicating which were pre-specified.                                                         |                    |
| <b>RESULTS</b>                |    |                                                                                                                                                                                                          |                    |
| Study selection               | 17 | Give numbers of studies screened, assessed for eligibility, and included in the review, with reasons for exclusions at each stage, ideally with a flow diagram.                                          | figure 1           |
| Study characteristics         | 18 | For each study, present characteristics for which data were extracted (e.g., study size, PICOS, follow-up period) and provide the citations.                                                             | table 1            |
| Risk of bias within studies   | 19 | Present data on risk of bias of each study and, if available, any outcome level assessment (see item 12).                                                                                                |                    |
| Results of individual studies | 20 | For all outcomes considered (benefits or harms), present, for each study: (a) simple summary data for each intervention group (b) effect estimates and confidence intervals, ideally with a forest plot. | 11                 |
| Synthesis of results          | 21 | Present results of each meta-analysis done, including confidence intervals and measures of consistency.                                                                                                  |                    |
| Risk of bias across studies   | 22 | Present results of any assessment of risk of bias across studies (see Item 15).                                                                                                                          |                    |
| Additional analysis           | 23 | Give results of additional analyses, if done (e.g., sensitivity or subgroup analyses, meta-regression [see Item 16]).                                                                                    |                    |
| <b>DISCUSSION</b>             |    |                                                                                                                                                                                                          |                    |
| Summary of evidence           | 24 | Summarize the main findings including the strength of evidence for each main outcome; consider their relevance to key groups (e.g., healthcare providers, users, and policy makers).                     | 12                 |
| Limitations                   | 25 | Discuss limitations at study and outcome level (e.g., risk of bias), and at review-level (e.g., incomplete retrieval of identified research, reporting bias).                                            | 12-15              |
| Conclusions                   | 26 | Provide a general interpretation of the results in the context of other evidence, and implications for future research.                                                                                  | 14-15              |
| <b>FUNDING</b>                |    |                                                                                                                                                                                                          |                    |
| Funding                       | 27 | Describe sources of funding for the systematic review and other support (e.g., supply of data); role of funders for the systematic review.                                                               | 17                 |

From: Moher D, Liberati A, Tetzlaff J, Altman DG, The PRISMA Group (2009). Preferred Reporting Items for Systematic Reviews and Meta-Analyses: The PRISMA Statement. PLoS Med 6(6): e1000097. doi:10.1371/journal.pmed1000097

For more information, visit: [www.prisma-statement.org](http://www.prisma-statement.org).
